# 1 Focal seizures are organized by feedback between neural 2 activity and ion concentration changes

3 Damiano Gentiletti,<sup>1</sup> Marco de Curtis,<sup>2</sup> Vadym Gnatkovsky,<sup>2,3</sup> and Piotr Suffczynski,<sup>1\*</sup>

4

## 5 Author affiliations:

6 1 Department of Biomedical Physics, Faculty of Physics, University of Warsaw, 02-093  
7 Warsaw, Poland

8 2 Epilepsy Unit, Fondazione IRCCS Istituto Neurologico *Carlo Besta*, 20133 Milan, Italy

9 3 Department of Epileptology, University Hospital Bonn, 53127 Bonn, Germany

10

11 \*Corresponding author: [suffa@fuw.edu.pl](mailto:suffa@fuw.edu.pl)

12

## 13 Abstract

14 Human and animal EEG data demonstrate that focal seizures start with low-voltage fast activity,  
15 evolve into rhythmic burst discharges and are followed by a period of suppressed background  
16 activity. This suggests that processes with dynamics in the range of tens of seconds govern focal  
17 seizure evolution. We investigate the processes associated with seizure dynamics by  
18 complementing the Hodgkin-Huxley mathematical model with the physical laws that dictate ion  
19 movement and maintain ionic gradients. Our biophysically realistic computational model closely  
20 replicates the electrographic pattern of a typical human focal seizure characterized by low  
21 voltage fast activity onset, tonic phase, clonic phase and postictal suppression. Our study  
22 demonstrates, for the first time *in silico*, the potential mechanism of seizure initiation by  
23 inhibitory interneurons via the initial build-up of extracellular  $K^+$  due to intense interneuronal  
24 spiking. The model also identifies ionic mechanisms that may underlie a key feature in seizure  
25 dynamics, i.e., progressive slowing down of ictal discharges towards the end of seizure. Our  
26 model prediction of specific scaling of inter-burst intervals is confirmed by seizure data recorded

27 in the whole guinea pig brain *in vitro* and in humans, suggesting that the observed termination  
28 pattern may hold across different species. Our results emphasize ionic dynamics as elementary  
29 processes behind seizure generation and indicate targets for new therapeutic strategies.

## 30 **Introduction**

31 Focal seizure patterns recorded with intracranial and intracerebral electrodes in patients  
32 submitted to presurgical evaluation often consist of distinct phases (Fraszczuk et al., 1998;  
33 Spencer et al., 1992; Velasco et al., 2000). A frequently observed onset pattern in patients with  
34 temporal lobe epilepsy (TLE) is characterized by low-voltage fast (LVF) activity in the gamma  
35 range (30–80 Hz) (Avoli et al., 2016; de Curtis & Gnatkovsky, 2009; Lagarde et al., 2019;  
36 Perucca et al., 2014). LVF seizure onset is followed by the recruitment of irregular spiking  
37 behavior which evolves into periodic burst discharges that gradually decrease in frequency and  
38 suddenly cease. Seizures are often followed by a period of reduced EEG amplitude known as  
39 postictal EEG suppression. The traditional view on epileptic seizures is that they result from an  
40 imbalance of synaptic excitation and inhibition (Bradford, 1995; Bragin et al., 2009). It is unclear  
41 how this concept may account for the electroencephalographic complexity of TLE seizures and  
42 their characteristic progression from one phase to the next. The findings of several studies have  
43 not confirmed the role of synaptic interaction in seizure generation or progression. It has been  
44 shown that blocking synaptic transmission via a low  $\text{Ca}^{2+}$  solution led to the development of  
45 synchronized seizure-like events (SLE) in hippocampal CA1 slices (Jefferys & Haas, 1982;  
46 Yaari et al., 1983) and in the intact hippocampus (Feng & Durand, 2003). Moreover, the  
47 synchronized epileptiform activity can be recorded across two hippocampal regions separated  
48 by a mechanical lesion, without the involvement of electrochemical synaptic communication  
49 (Lian et al., 2001). Finally, in photosensitive baboons, light-induced neocortical seizure  
50 discharges were accompanied by depletion of extracellular  $\text{Ca}^{2+}$  to levels incompatible with the  
51 chemical synaptic transmission (Pumain et al., 1985). Additionally, a paradoxical increase in  
52 inhibitory cell firing and a decrease in pyramidal cell activity at seizure onset was documented  
53 in *in vitro* rodent slices (Derchansky et al., 2008; Fujiwara-Tsukamoto et al., 2007; Lévesque et  
54 al., 2016; Lillis et al., 2012; Ziburkus et al., 2006), in the *in vitro* whole guinea pig brain  
55 (Gnatkovsky et al., 2008; Uva et al., 2015), and in human and animal *in vivo* recordings (Elahian  
56 et al., 2018; Grasse et al., 2013; Miri et al., 2018; Toyoda et al., 2015; Truccolo et al., 2011).  
57 The above-mentioned studies suggest that processes at the network level related to changes in

58 synaptic gains cannot be the sole mechanisms that control seizure generation and progression,  
59 and that other factors must be involved in the process of ictogenesis.

60 Although several non-synaptic mechanisms have been proposed to influence abnormal  
61 synchronization (Blauwblomme et al., 2014; de Curtis et al., 2018; Jefferys et al., 2012;  
62 Raimondo et al., 2015), the specific mechanisms responsible for seizure induction, evolution and  
63 termination remain unclear. Specifically, the relative contribution of raised extracellular  
64 potassium (Avoli et al., 1996; Gnatkovsky et al., 2008) vs. increased intracellular chloride  
65 leading to depolarizing GABA responses (Alfonsa et al., 2015; Lillis et al., 2012) remains to be  
66 established. In the present study, we investigated the possible mechanisms of the LVF seizure  
67 pattern using a realistic computational model of the hippocampal network that included activity-  
68 dependent ion concentration changes. We based our simulations on the data recorded in the *in*  
69 *vitro* isolated guinea pig brain preparation because SLE in this model closely resemble human  
70 temporal lobe seizures (de Curtis et al., 2006; de Curtis & Gnatkovsky, 2009) and are initiated  
71 by enhanced firing of inhibitory interneurons (Gnatkovsky et al., 2008). We used these  
72 experimental recordings to guide our *in silico* study due to the availability of data at the network,  
73 cellular and ionic levels. A computer model showed that simulated seizures initiated via  
74 increased interneuron discharges, evolved and terminated autonomously due to activity-  
75 dependent ion concentration shifts and homeostatic mechanisms that worked continuously to  
76 restore physiological transmembrane ion levels. Our modelling results suggest a link between  
77 the seizure termination mechanism and postictal suppression state and predict a specific scaling  
78 law of inter-bursting intervals observed at the end of seizures, which was validated  
79 experimentally.

## 80 **Results**

81 The model consisted of five cells, four pyramidal neurons (PY) and a fast-spiking inhibitory  
82 interneuron (IN), arranged as a chain structure (Figure 1). The ionic dynamics of  $K^+$ ,  $Na^+$ ,  $Ca^{2+}$   
83 and  $Cl^-$  were incorporated and activity-dependent changes in their concentrations were  
84 computed. Concentration changes in each extracellular or intracellular compartment were  
85 dependent on several mechanisms such as active and passive membrane currents, inhibitory  
86 synaptic GABA<sub>A</sub> currents,  $Na^+/K^+$ -pump, KCC2 cotransporter, glial  $K^+$  buffer,  $Ca^{2+}$  pump and  
87 buffer, radial diffusion, longitudinal diffusion and volume changes. Additionally, we included

88 impermeant anions ( $A^-$ ) with concentration-dependent volume changes and bicarbonate ions  
89 ( $HCO_3^-$ ) that contributed to GABA<sub>A</sub> currents.

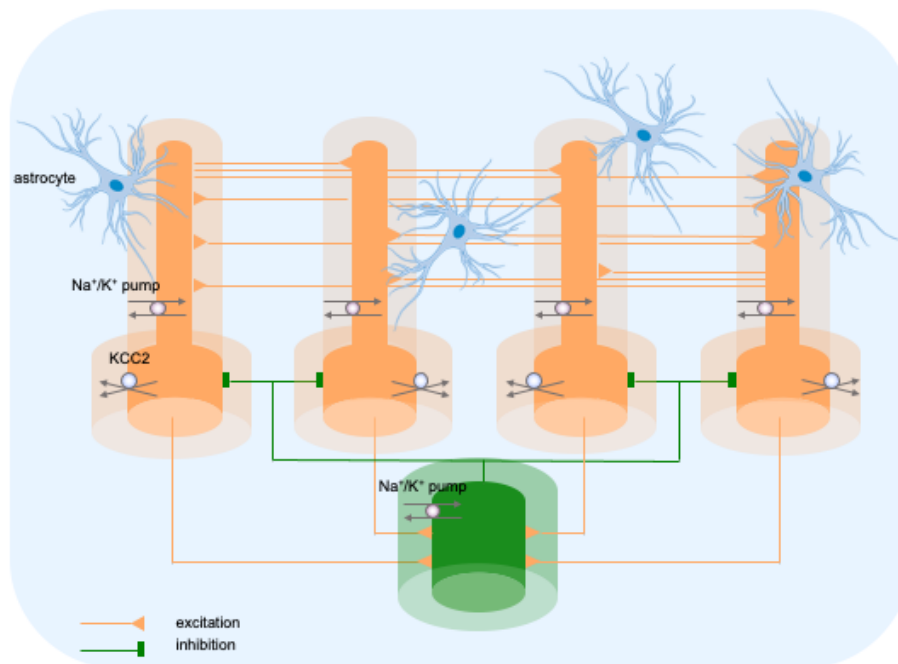

90  
91 **Figure 1. Model diagram.** The model consisted of four pyramidal cells (orange) and an  
92 interneuron (green) linked by excitatory (AMPA) and inhibitory (GABA<sub>A</sub>) synaptic connections.  
93 Each cellular compartment was surrounded by an interstitial compartment. The interstitial space  
94 was enclosed in a common bath (blue) which represented the surrounding tissue and vasculature  
95 not included in the model. The model included variable intracellular and extracellular ion  
96 concentrations computed according to ionic currents flowing across neuronal membranes,  
97 longitudinal diffusion between the dendritic and somatic compartments, radial diffusion between  
98 neighboring interstitial compartments and diffusion to/from the bath. Additionally, the model  
99 included ionic regulation mechanisms: a Na<sup>+</sup>/K<sup>+</sup>-pump, a KCC2 cotransporter and K<sup>+</sup> buffering  
100 by astrocytes.

### 101 **Three phases of an LVF onset SLE**

102 Brief perfusions (3 minutes) of 50 microM bicuculline in the isolated guinea pig brain transiently  
103 reduces GABAergic inhibition to 60-70% and leads to strong interneuron bursting in the absence  
104 of principal cells activity (Gnatkovsky et al., 2008; Uva et al., 2015). Therefore, to initiate a SLE  
105 in the model we choose to selectively and transiently enhance discharge of the inhibitory

106 interneuron. In this way we made our model more general and applicable to other experimental  
107 data in which paradoxical increase in GABAergic cell firing is observed at seizure onset.

108 A simulated seizure emerging from normal background activity is shown in Figure 2. The SLE  
109 was triggered by depolarizing current applied to the IN at second 60 (Figure 2C, yellow trace).  
110 Strong firing (initial rate of 150 Hz) of the IN (Figure 2C) led to small amplitude fast activity in  
111 the LFP signal (Figure 2A between the 60 and 68-second timestamps) associated with the onset  
112 of the simulated SLE. After approximately 10 seconds, the PY cells began to generate a strong  
113 tonic discharge, resulting in an irregular LFP spiking signal with increased amplitude typically  
114 associated with the SLE tonic phase (Figure 2B; 65–80 seconds). Approximately 20 seconds  
115 after the onset of the SLE, the cellular firing pattern of PY cells switched from tonic to bursting  
116 discharge, leading to LFP oscillations which corresponded to the bursting phase (Figure 2A, after  
117 80 seconds). The three types of PY cell activity are shown in an extended time scale in Appendix  
118 I – figure 1A. As the SLE progressed, the burst rate gradually decreased and ictal discharges  
119 spontaneously terminated. Postictally, the SLE was followed by a period of silence for  
120 approximately 90 seconds which was visible in the LFP signal and in the PY and IN traces  
121 (Figure 2A–C). After the postictal depression, the background firing reappeared and gradually  
122 returned to a baseline level. The SLE discharges were accompanied by significant changes in the  
123 intracellular and extracellular ionic concentrations. At the onset of the seizure, extracellular  
124 potassium concentration ( $[K^+]_o$ ) increased sharply in the somatic compartment, remained  
125 elevated throughout the SLE and slightly decreased toward the end of the episode (Figure 2D).  
126 Intracellular sodium concentration ( $[Na^+]_i$ ) steadily increased during the bursting phase in both  
127 somatic and dendritic compartments and reached a plateau around the offset of the SLE (Figure  
128 2E). Intracellular chloride concentration ( $[Cl^-]_i$ ) exhibited a gradual increase from the beginning  
129 of the SLE and was highest at the end of the paroxysmal firing (Figure 2F).

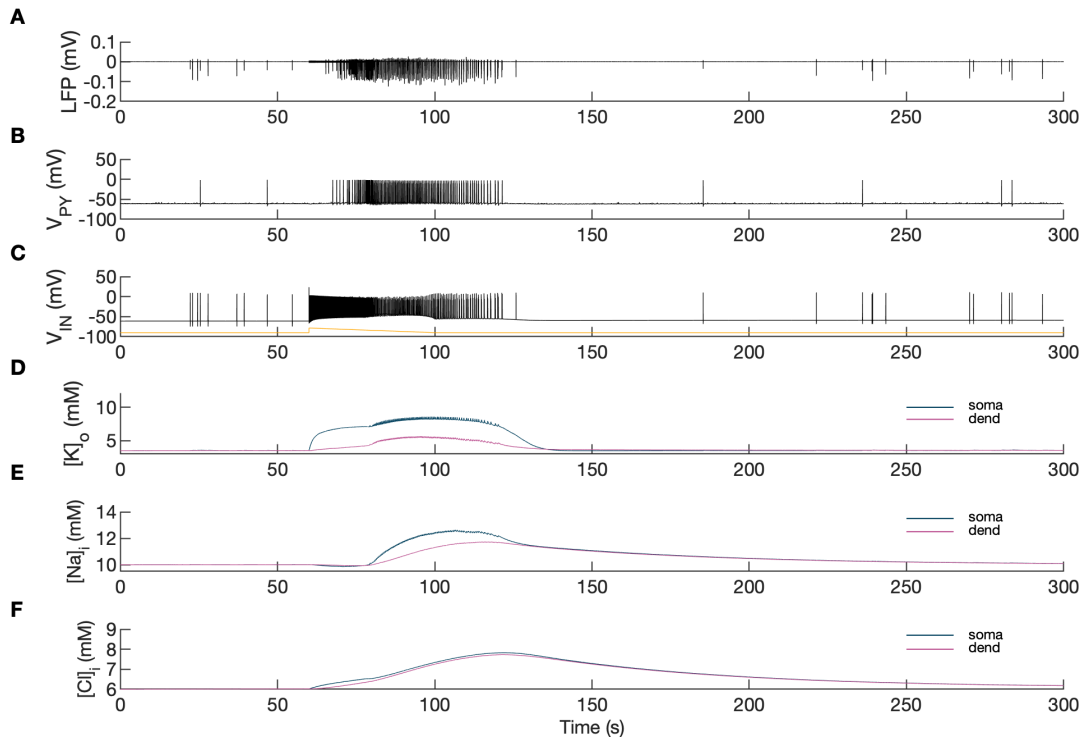

130

131 **Figure 2. Model behavior during an SLE. (A)** Local field potential (LFP) signal. **(B)**  
132 Pyramidal cell (PY) membrane potential. **(C)** Interneuron (IN) membrane potential. **(D)**  
133 Extracellular potassium concentration. **(E)** Intracellular sodium concentration. **(F)** Intracellular  
134 chloride concentration. In the interictal phase (0–60 seconds), the model generated irregular  
135 background firing and the ion concentrations were at their resting values (**A–F**). The current  
136 injected into the interneuron at second 60 (**C**, yellow) triggered fast IN spiking (**C**, black) which  
137 also manifested as low voltage fast activity in the LFP signal (**A**). Approximately 10 seconds  
138 after the initiation of the SLE, PY cells initiated tonic firing that subsequently shifted to bursting  
139 (**B**). The behavior of the PY cells was reflected in the LFP trace which showed irregular activity  
140 and synchronized bursting (**A**). The SLE terminated at approximately second 120 and was  
141 followed by a period of reduced excitability (**A–C**). The cellular activity was accompanied by  
142 significant ion concentration shifts. Extracellular potassium in the somatic compartment  
143 increased sharply and remained elevated throughout the SLE (**D**, dark blue). The  $[K^+]_o$  increase  
144 in the dendritic compartment was slower and less pronounced (**D**, violet). The intracellular  
145 sodium increased gradually toward a plateau (**E**). The intracellular chloride accumulated steadily  
146 throughout the SLE (**F**).

147 A comparison of the simulation results with the available experimental data is shown in  
148 Figure 3. In the isolated guinea pig brain, the SLE activity with an LVF onset pattern (Figure

149 3A, top trace) was induced by 3-min arterial application of bicuculine. The transition from  
150 preictal to ictal state which occurred at approximately second 10 was associated with a strong  
151 discharge of fast-spiking interneurons (Figure 3A, third trace) and transient silencing of the PY  
152 cells (Figure 3A, second trace). Within a few seconds from the initiation of the sustained  
153 interneuron discharge, the principal PY cells were recruited first into tonic firing and  
154 subsequently into bursting discharges which were visible in the PY membrane potential and LFP  
155 signals.  $[K^+]_o$  sharply increased at the onset of the SLE and remained elevated afterward (Figure  
156 3A, bottom trace). The *in silico* results (shown for comparison in the same timescale in Figure  
157 3B) replicated the experimental data in many respects including LFP signal characteristics,  
158 cellular firing pattern and  $[K^+]_o$  time course.

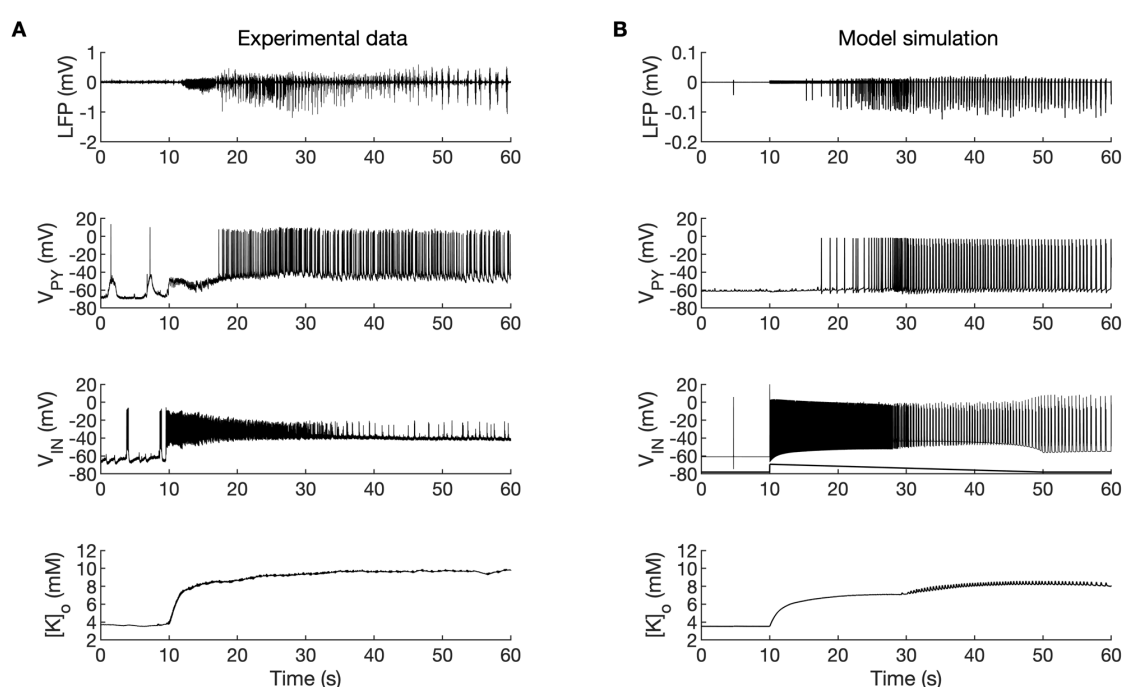

159

160 **Figure 3. A comparison between the experimental data and the model simulation. (A)**  
161 Experimental recordings of a seizure-like event (SLE) in the *in vitro* isolated whole guinea pig  
162 brain preparation (de Curtis et al., 2006; Gnatkovsky et al., 2008; Uva et al., 2015). From top to  
163 bottom: LFP signal, intracellular recording of the pyramidal cell (PY) and interneuron (IN),  
164 extracellular potassium. The onset of the SLE was associated with increased IN firing, silencing  
165 PY and low-voltage fast (LVF) activity in the LFP signal. Approximately 10 seconds after the  
166 onset of the SLE, the PY exhibited a tonic and then burst firing behavior. The extracellular  
167 potassium increased up to approximately 10 mM at the onset of the SLE and remained elevated



168 afterward. **(B)** The activity patterns in the LFP signal, pyramidal cells, interneuron and  $[K^+]_o$ .  
169 were reproduced accurately by the model. Signals presented in Figure 3A were recorded in  
170 different experiments. LFP and interneuron data have been published previously (Gentiletti et  
171 al., 2017; Gnatkovsky et al., 2008) while pyramidal cell and  $[K^+]_o$  data have never been published  
172 before.

173 In the simulations, the excitatory and inhibitory synaptic conductances were “clamped”  
174 throughout the entire simulation period, hence, they could not contribute to the progression from  
175 one phase to another. Conversely, variations in ion concentrations were expected to affect  
176 neuronal excitability. For example, an increase in  $[K^+]_o$  reduces the driving force of  $K^+$  currents  
177 responsible for hyperpolarized resting membrane potential and spike repolarization.  $[Cl^-]_i$   
178 accumulation causes depolarizing shift in  $E_{GABAa}$  reducing the efficacy of GABAa inhibition.  
179  $[Na^+]_i$  and  $[K^+]_o$  affect the rate of the  $Na^+/K^+$ -pump that transports three  $Na^+$  ions out of the cell  
180 for every two  $K^+$  ions pumped into the cell, thus producing an outward current. Accumulation of  
181  $[K^+]_o$  and  $[Na^+]_i$  increases the pump rate and enhances the hyperpolarizing pump current. Hence,  
182 to determine the intrinsic mechanism that modulates excitability, we first investigated the  
183 behavior of the model in response to variations in extracellular potassium and intracellular  
184 sodium concentrations and next we considered the role of chloride dynamics.

### 185 **The effects of $[K^+]_o$ and $[Na]_i$ on the network model**

186 Activity-dependent changes in ion concentrations are slow compared to neuronal dynamics,  
187 which are relatively fast. To analyze such a system, with slow and fast timescales, it is possible  
188 to decouple the fast variables (e.g., membrane potential) from the slow variables (e.g., ionic  
189 concentrations). Accordingly, to analyze the role of  $[K^+]_o$  and  $[Na^+]_i$  in shaping single-cell and  
190 network dynamics, we disabled all mechanisms controlling ionic concentrations and analyzed  
191 the behavior of the model for different values of  $[K^+]_o$  and  $[Na^+]_i$ . The values of these variables  
192 were modified externally and treated as control parameters. To obtain improved affinity with the  
193 reference simulation (Figure 2), the chloride concentration in the somatic and dendritic  
194 compartments of the PY cells was set to 7 mM, which corresponded to its mean value during the  
195 SLE (Figure 2F). In the single cell analysis, all synaptic connections were removed. In the  
196 network analysis, all synaptic connections were intact except afferent excitatory input, which  
197 was removed from PY cells to eliminate the stochastic component from the analysis;  
198 depolarizing current injection was removed from the interneuron. The behavior of a single PY  
199 cell was analyzed for different values of extracellular potassium concentration in the dendritic



200 ( $[K^+]_{o,dend}$ ) and somatic compartments ( $[K^+]_{o,soma}$ ). During the analysis, for each fixed value of  
201  $[K^+]_{o,dend}$ , we performed simulations when sweeping the  $[K^+]_{o,soma}$  value from 3 mM to 12 mM  
202 (in steps of 0.25 mM) in the forward and backward direction. The initial conditions for each  
203  $[K^+]_{o,soma}$  value corresponded to the final states in the previous step. For each  $[K^+]_{o,soma}$  step, we  
204 simulated 5 seconds of activity. After a full sweep with all  $[K^+]_{o,soma}$  steps in both directions, the  
205  $[K^+]_{o,dend}$  was increased and the analysis was repeated. The analysis was performed for the  
206  $[K^+]_{o,dend}$  values in the range of 3–6 mM, in steps of 0.5 mM (or 0.25 mM and 0.125 mM if a  
207 better resolution was required). We found that the behavior of the single cell and network models  
208 was the same for increasing and decreasing steps of  $[K^+]_{o,soma}$  with small domains of bistability  
209 not larger than one step (0.25 mM) between the activity phases. Analysis of the dynamics of a  
210 single isolated cell for a reference value of  $[Na^+]_i$  at 10 mM can be found in Appendix I – figure  
211 1. In the network analysis, a full sweep with all  $[K^+]_{o,soma}$  and  $[K^+]_{o,dend}$  steps (as described above)  
212 was performed for three different values of  $[Na^+]_{i,soma}$  namely, 10 mM, 11 mM and 12 mM.  
213 Following Figure 2E we assumed, that corresponding values of  $[Na^+]_{i,dend}$  were lower and were  
214 10 mM, 10.5 mM and 11 mM, respectively. The analysis results are shown in Figure 4A, in  
215 which the various activity patterns, i.e., rest, tonic firing and bursting are color-coded (as shown  
216 on the right). A comparison of the network activities for different values of  $[Na^+]_i$  in the three  
217 graphs in Figure 4A demonstrates that the main effect of an increase in  $[Na^+]_i$  was a shrinking of  
218 the tonic and bursting domains and an expansion of the resting domain due to upregulation of  
219 the hyperpolarizing effect of increased  $[Na^+]_i$  on the pump current.

## 220 **The evolution of the SLE mediated by $[K^+]_o$ and $[Na]_i$**

221 In the previous section, the influence of  $[K^+]_o$  and  $[Na]_i$  on network behavior was examined  
222 without accounting for the time factor. Here, we present a fast-slow system analysis approach  
223 that considers the time evolution of ionic concentrations, as shown in Figure 2. Hence, we  
224 assessed the dependence of the evolution of an SLE on externally manipulated changes in  $[K^+]_o$   
225 and  $[Na]_i$  with fixed concentrations of all other ions. As in Figure 4A, the chloride concentration  
226 in the somatic and dendritic compartments of the PY cells was set to 7 mM. To schematically  
227 describe the extracellular potassium concentration time course from preictal to postictal state (as  
228 shown in Figure 2D), we identified four distinct stages (as shown in Figure 4B top panel): I) a  
229 sharp increase in  $[K^+]_{o,soma}$ , II) elevated  $[K^+]_{o,soma}$ , a slow increase in  $[K^+]_{o,dend}$ , III) a slow  
230 decrease in  $[K^+]_{o,soma}$  and  $[K^+]_{o,dend}$ , IV) a decrease in  $[K^+]_{o,soma}$  and  $[K^+]_{o,dend}$  back to their resting  
231 values. Variations in potassium concentrations were accompanied by changes in  $[Na^+]_i$  (Figure

232 2E). In the preictal period and during the SLE tonic firing phase,  $[\text{Na}^+]_i$  in the soma and dendrite  
233 was stable, while it increased during the burst firing phase and reached a plateau toward the end  
234 of the episode. In the postictal period,  $[\text{Na}^+]_i$  in both compartments slowly returned to the initial  
235 value. The time course of  $[\text{Na}^+]_i$  approximating intracellular somatic and dendritic sodium  
236 evolution is shown in Figure 4B (middle panel). The corresponding representative PY cell  
237 activity is shown in Figure 4B (bottom trace). To distinguish different SLE phases, the PY cell  
238 activity pattern was marked using a color-code, as in Figure 4A. As  $[\text{K}^+]_o$  and  $[\text{Na}^+]_i$  followed  
239 their predefined time course, PY cells exhibited transition from rest to tonic firing, progressed  
240 into bursting with a slowing-down pattern and eventually returned to the resting state. In the  
241 postictal period (after stage IV), the  $[\text{Na}^+]_i$  remained elevated for more than 40 seconds (Figure  
242 4B middle panel) giving rise to an enhanced hyperpolarizing  $\text{Na}^+/\text{K}^+$ -pump current that reduced  
243 the excitability of the network and contributed to postictal depression, as described in the last  
244 paragraph (Figure 7). To further observe the time evolution of the SLE in the  $[\text{K}^+]_{o,\text{soma}}$ ,  $[\text{K}^+]_{o,\text{dend}}$   
245 parameter space, we superimposed potassium changes on the bifurcation diagrams in Figure 4A.  
246 The distinct stages of the potassium time course are marked by arrows. The crossing of a color  
247 border by an arrow corresponds to a transition between different firing regimes. The initial  
248 increase of somatic  $[\text{K}^+]_o$  (stage I) led to a transition from the resting state to tonic firing (Figure  
249 4A, first panel), while a subsequent increase of dendritic  $[\text{K}^+]_o$  (stage II) led to a transition from  
250 tonic firing to bursting (Figure 4A, middle panel). A subsequent decrease in somatic and  
251 dendritic  $[\text{K}^+]_o$  (stage III) led to the termination of the SLE, as the cell activity reentered the  
252 resting state region (Figure 4A, last panel). After termination of the SLE,  $[\text{K}^+]_{o,\text{soma}}$  and  $[\text{K}^+]_{o,\text{dend}}$   
253 returned to their resting values (stage IV in Figure 4A, last panel).

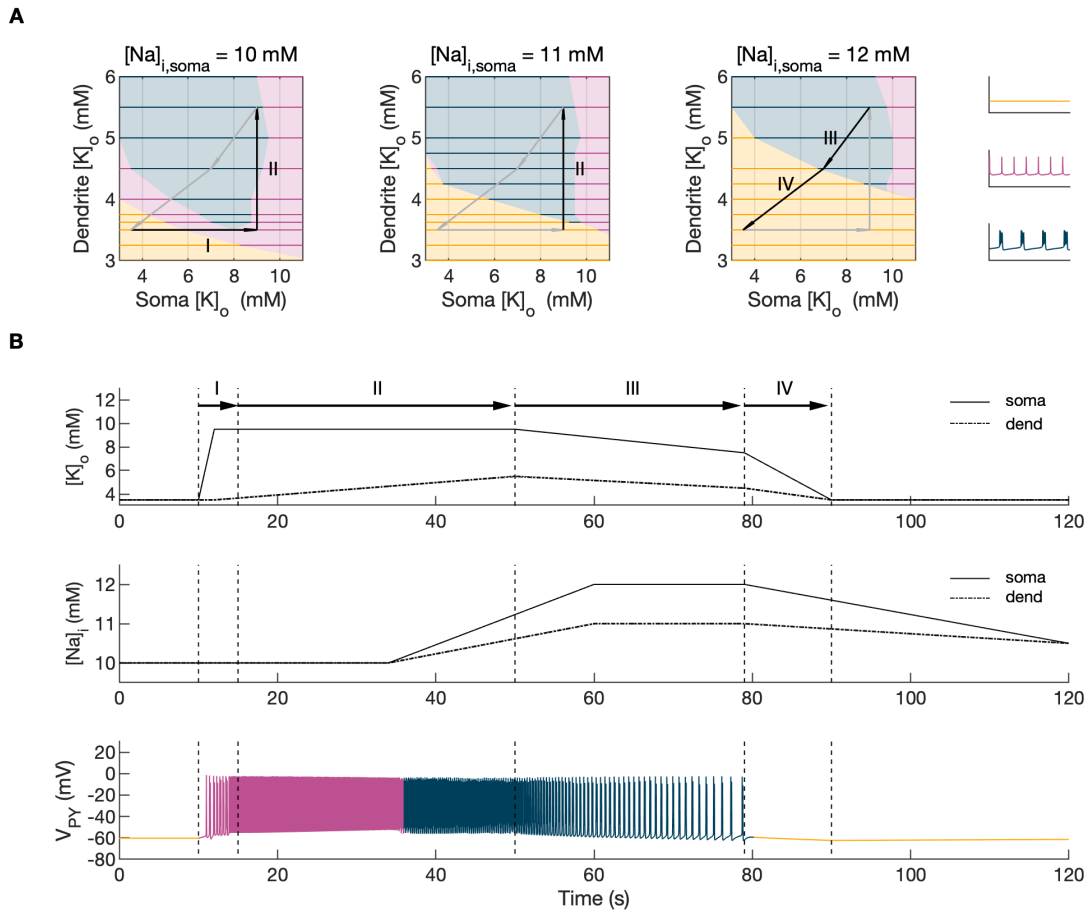

254  
 255 **Figure 4. Analysis of the model.** In the bifurcation analysis extracellular potassium and  
 256 intracellular sodium concentrations in the PY and IN cells were control parameters.  
 257 Concentrations of all other ions were fixed at their reference values (except chloride: [Cl<sup>-</sup>]<sub>i,soma</sub>,  
 258 [Cl<sup>-</sup>]<sub>i,dend</sub> equal to 7 mM), all ion accumulation mechanisms were blocked and background input  
 259 was removed. **(A)** Bifurcation diagrams showing the dependence of the behavior of the model  
 260 on [K<sup>+</sup>]<sub>o,dend</sub> and [K<sup>+</sup>]<sub>o,soma</sub> for varying values of [Na<sup>+</sup>]<sub>i,soma</sub>, [Na<sup>+</sup>]<sub>i,dend</sub>. The diagram colors  
 261 correspond to types of activity shown on the right: rest (yellow), tonic firing (violet) and bursting  
 262 (dark blue). An increase in [Na<sup>+</sup>]<sub>i</sub> progressively decreased the domains of tonic firing and  
 263 bursting and increased the resting domain indicating a general decrease in network excitability.  
 264 The black and gray arrows correspond to the evolution of [K<sup>+</sup>]<sub>o,soma</sub>, [K<sup>+</sup>]<sub>o,dend</sub> during different  
 265 phases of the SLE, shown in part **B**. **(B)** A simulation of the model with [K<sup>+</sup>]<sub>o,soma</sub>, [K<sup>+</sup>]<sub>o,dend</sub> and  
 266 [Na<sup>+</sup>]<sub>i,soma</sub>, [Na<sup>+</sup>]<sub>i,dend</sub> as the external control parameters, that illustrated the occurrence of  
 267 transitions between different types of activity during the SLE. The top two panels show the time  
 268 course of [K<sup>+</sup>]<sub>o,soma</sub>, [K<sup>+</sup>]<sub>o,dend</sub> and [Na<sup>+</sup>]<sub>i,soma</sub>, [Na<sup>+</sup>]<sub>i,dend</sub> and approximate their evolution during  
 269 the SLE (Figure 2). The third panel shows the resulting PY cell behavior. The parameter

270 evolution is divided into four phases indicated by the arrows denoted as I–IV in part **A** and **B**.  
271 Phase I corresponds to a sharp increase in  $[K^+]_{o,soma}$  which led to a transition from rest to tonic  
272 firing (marked as a black arrow ‘I’ in the first panel in **A**). Phase II corresponds to a slow increase  
273 in  $[K^+]_{o,dend}$  which led to a transition from tonic firing to bursting (marked as a black arrow ‘II’  
274 in the first and second panels in **A**). Phase III represents a period of increased  $[Na^+]_{i,soma}$ ,  
275  $[Na^+]_{i,dend}$  and decreasing  $[K^+]_{o,soma}$  and  $[K^+]_{o,dend}$  which led to the termination of the SLE  
276 (represented by a black arrow ‘III’ with its tip in the yellow domain in the third panel in **A**).  
277 Phase IV corresponds to the postictal period with elevated  $[Na^+]_i$  and a return of  $[K^+]_{o,soma}$ ,  
278  $[K^+]_{o,dend}$  to their baseline values (marked as a black arrow ‘IV’ in the third panel in **A**).

### 279 **The role of $[Cl^-]_i$**

280 Chloride accumulation depends on  $Cl^-$  influx through chloride leak and GABA<sub>A</sub> receptor  
281 channels, but it is also affected by variations in potassium concentrations mediated via KCC2  
282 cotransport. Hence, chloride and potassium could not be considered as independent control  
283 parameters in the fast-slow system analysis approach. Furthermore, visualization of the results  
284 with five control parameters ( $[K^+]_{o,soma}$ ,  $[K^+]_{o,dend}$ ,  $[Na^+]_{i,soma}$ ,  $[Na^+]_{i,dend}$  and  $[Cl^-]_i$ ) is challenging.  
285 Therefore, to evaluate the role of chloride accumulation, we compared the reference model with  
286 the model in which chloride dynamics was excluded (Figure 5). When considering the role of  
287 chloride homeostasis mediated via KCC2, the direction of K–Cl cotransport depends on the  $E_{Cl}$   
288 vs  $E_K$  or the ratio  $[K^+]_i[Cl^-]_i/[K^+]_o[Cl^-]_o$  (Payne et al., 2003). If the ratio is greater than 1, KCC2  
289 extrudes  $Cl^-$  and  $K^+$ . If  $E_K$  is greater than  $E_{Cl}$ , the KCC2 flow is reversed and  $Cl^-$  and  $K^+$  ions are  
290 transported into the cell. When chloride accumulation was removed (Figure 5A), the reversal  
291 potentials of the  $Cl^-$  and GABA<sub>A</sub> currents ( $E_{Cl}$  and  $E_{GABA_A}$ ) were fixed (blue and light blue lines  
292 in Figure 5A, second panel). Under such conditions, the firing of the interneuron (Figure 5A,  
293 third panel) exerted a steady inhibitory influence on the PY cells. Additionally, it increased  $[K^+]_o$   
294 above fixed  $[Cl^-]_i$  level (Figure 5A, fourth panel). As a result,  $E_K$  exceeded  $E_{Cl}$  and the KCC2  
295 transported  $K^+$  and  $Cl^-$  into the cells (Figure 5A, fifth panel) and reduced the external  $K^+$   
296 concentration. All these effects transiently increased the PY cells tonic firing but the bursting  
297 SLE phase was not manifested (Figure 5A, first and second panel). Conversely, activation of the  
298 IN in the reference model, with chloride dynamics intact, led to a typical SLE (Figure 5B, top  
299 panel). The  $[Cl^-]_i$  accumulation was dominated by  $Cl^-$  influx through GABA<sub>A</sub> receptors and to  
300 lesser degree by KCC2 cotransport (Figure 5B, fifth and bottom panel). It led to enhanced  
301 excitability in two ways: i) by increasing the chloride reversal potential (blue line in Figure 5B,

302 second panel) toward the PY membrane potential, reducing the hyperpolarizing chloride leak  
 303 current; ii) by increasing the GABA<sub>A</sub> reversal potential (Figure 5B, second panel, light blue) that  
 304 approached the PY cell membrane potential, reducing the postsynaptic inhibitory current. These  
 305 changes led to the stronger tonic firing of the PY cells, which contributed to enhanced  $[K^+]_o$   
 306 accumulation (Figure 5B, third panel) leading to the transition into the SLE bursting phase.

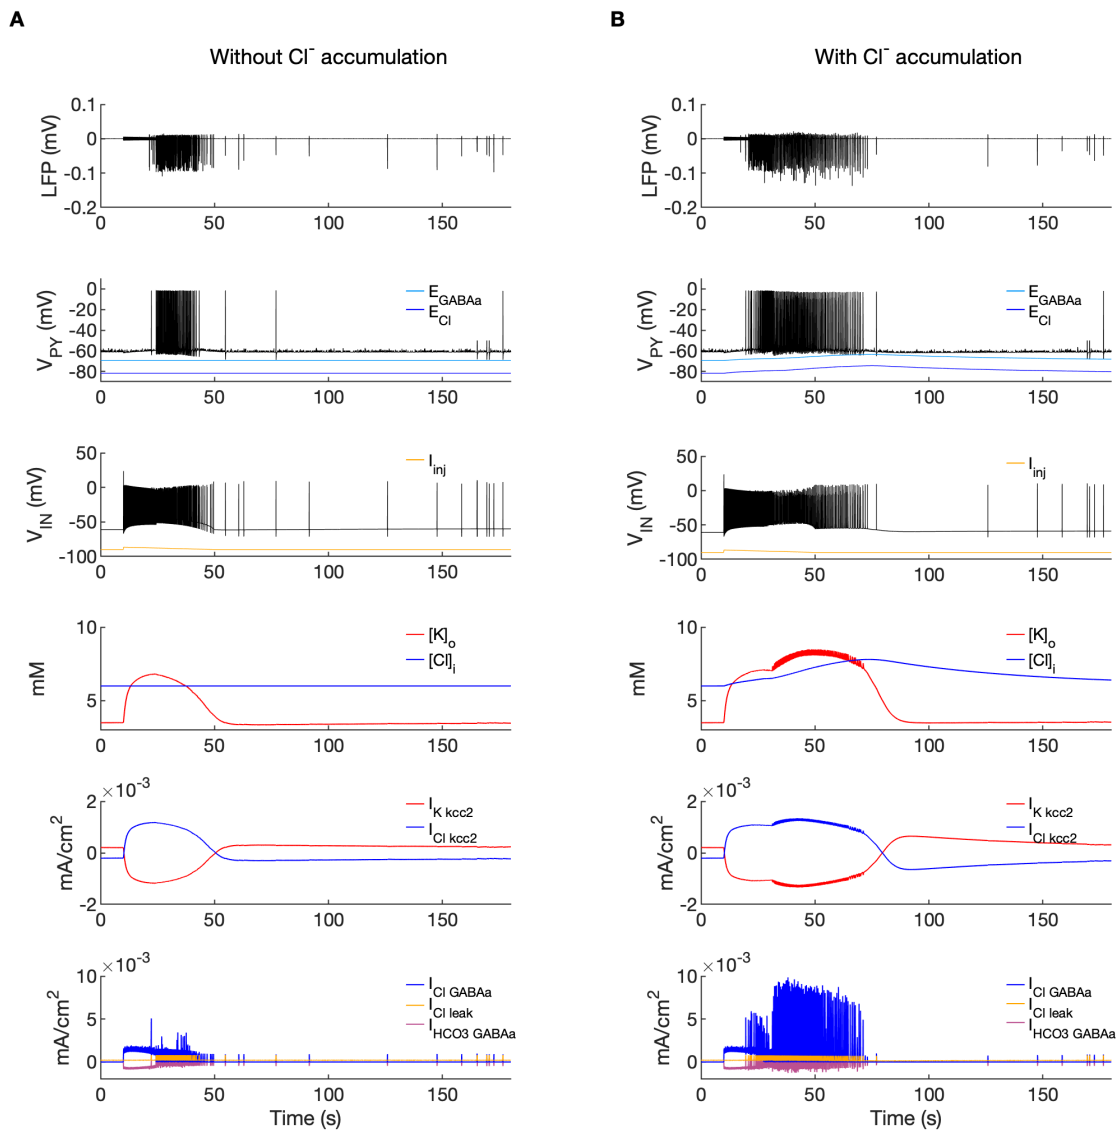

307  
 308 **Figure 5. A comparison of the model without and with chloride accumulation.** The six  
 309 panels in each column show respectively (from top to bottom): the LFP signal, the PY cell  
 310 membrane potential, the IN membrane potential, the extracellular potassium concentration and  
 311 intracellular chloride concentration, the chloride and potassium KCC2 currents in the somatic  
 312 compartments and the GABA<sub>A</sub> synaptic currents ( $Cl^-$  and  $HCO_3^-$ ) together with the leak chloride

313 current. Additionally, the equilibrium potential of chloride and GABA<sub>A</sub> are shown in the second  
314 panel from the top. **(A)** When the  $[Cl^-]_i$  accumulation mechanism was blocked, the chloride  
315 concentration was fixed at the reference value (fourth panel, blue). Without chloride  
316 accumulation, the PY cell (second panel) fired tonic train of spikes due to transient rise in  $[K^+]_o$   
317 (fourth panel, red) mediated by the IN discharge triggered by the current injection (third panel,  
318 yellow). Elevated  $[K^+]_o$  and fixed  $[Cl^-]_i$  promoted  $K^+$  influx via KCC2 (fifth panel, red), thus  
319 lowering  $[K^+]_o$  and further preventing the generation of the full SLE. **(B)** With chloride  
320 accumulation, the IN discharge led to an increase in  $E_{Cl}$  and  $E_{GABA_A}$  (second panel, blue and light  
321 blue) which reduced the hyperpolarizing  $I_{Cl,leak}$  and  $I_{GABA_A}$  currents and enhanced excitability.  
322 The increase in firing rate of the PY cells led to prolonged  $[K^+]_o$  accumulation (fourth panel, red)  
323 leading to the full SLE.

## 324 **Model predictions**

325 The computer model generated predictions about features that were not explicitly implemented  
326 but were consequences of the elementary neurobiological mechanisms used to create the model.  
327 These phenomena are described below. The experimental confirmation of features predicted by  
328 a model is an essential step in model validation.

### 329 *The evolution of the inter-burst interval duration*

330 It is well known that muscle jerking during the clonic phase of a tonic-clonic seizure slows down  
331 before ceasing when seizure ends (Bromfield et al., 2006). Frequency slowing has also been  
332 observed in video sequences (Kalitzin et al., 2016) and electrographic counterparts of a seizure  
333 revealed by either EEG (Franaszczuk et al., 1998; Schiff et al., 2000) or EMG (Conradsen et al.,  
334 2013). In the model, a gradual increase in the interval between ictal bursts (IBI) was visible  
335 (Figure 2A and 3B). To observe the evolution of the IBI more precisely and identify the scaling  
336 pattern, the background noise was removed from the simulation. The absence of excitatory  
337 dendritic synaptic input was compensated with a steady depolarizing DC current of 1.85 pA  
338 injected into the dendrites of all PY cells. Current intensity was adjusted to preserve the original  
339 duration of the SLE as observed in the model with the background noise present. A simulated  
340 SLE trace and the detected ictal bursts (short bars) are shown in Figure 6A (top panel). The  
341 evolution of the IBI is shown below with either linear (Figure 6A, middle panel) or a logarithmic  
342 (Figure 6A, bottom panel) y-axis. The IBI on the semi-log graph laid on a straight line suggesting  
343 an exponential relationship. The evolution of the IBI during an SLE in a whole-brain *in vitro*

344 preparation (Figure 6B) and a human TLE seizure (Figure 6C) exhibited the same characteristics.  
345 Based on literature we considered four different scenarios of IBI evolution: linear, exponential,  
346 square root and logarithmic. The fits were evaluated by the root mean square error (RMSE).  
347 Exact RMSE values depended on the duration of the analyzed IBI sequence. In the model, RMSE  
348 values for logarithmic and exponential fits were often comparable. In the experimental data the  
349 exponential fit always had the lowest RMSE. Next, we used the fast-slow system analysis  
350 approach, as in Figure 4, to demonstrate how separate variations in  $[K^+]_o$ ,  $[Na^+]_i$  and  $[Cl^-]_i$  affect  
351 IBI slowing towards the end of an SLE. Linear decrease in  $[K^+]_o$  led to exponential IBI evolution,  
352 while linear increase in  $[Na^+]_i$  or decrease in  $[Cl^-]_i$  led to SLE termination with logarithmic  
353 scaling of IBI as determined by RMSE (Figure 6 – figure supplement 1). Note, that in this figure  
354 we simulated a decrease in  $[Cl^-]_i$  unlike increasing trend in  $[Cl^-]_i$  seen in Figure 2F. We observed  
355 that a linear increase in  $[Cl^-]_i$  didn't lead to IBI slowing and SLE termination, when simulated  
356 for up to 20 min (not shown). These results suggest that in the model, slowing of inter-burst  
357 interval towards the end of an SLE is mediated by simultaneous changes in  $[K^+]_o$  and  $[Na^+]_i$ .

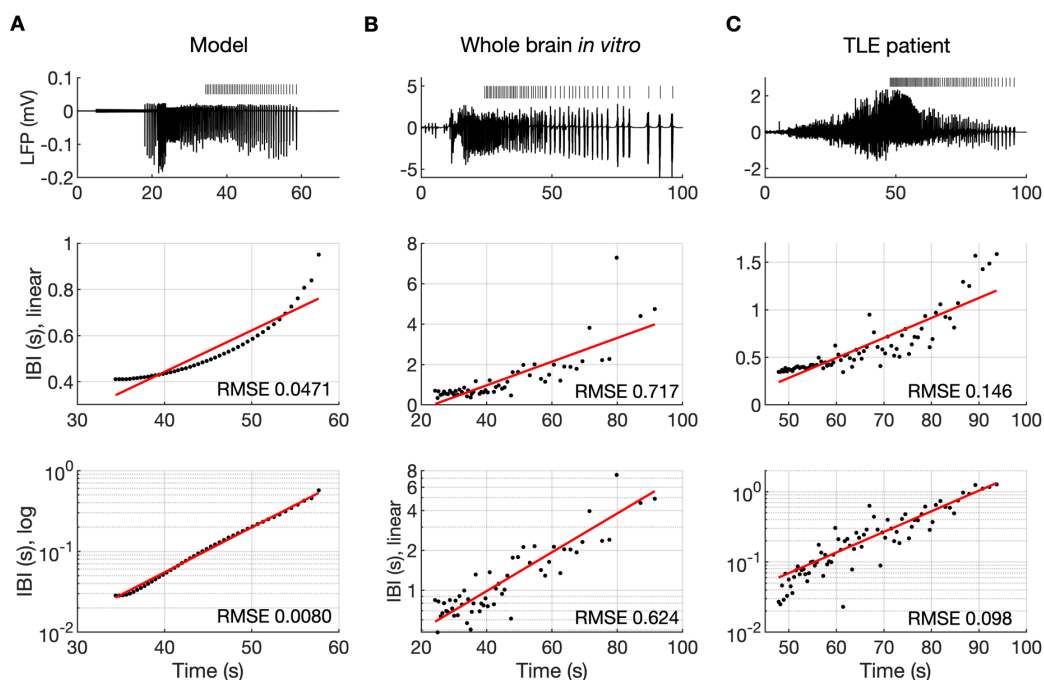

358  
359 **Figure 6. The evolution of inter-burst intervals (IBI) in the model and experimental data.**  
360 (A) In the simulation, the background input was removed and compensated with a small  
361 depolarizing current injected into the PY cells to preserve the duration of the SLE. A decreasing  
362 rate of bursting is visible in the LFP signal and in the detected bursts marked above the trace (top  
363 panel). The evolution of the IBI is shown with the y-axis on a linear scale (middle panel) and a



364 log scale (bottom). On a linear y-axis plot, the data appear curved while on a semi-log plot they  
365 lay on a straight line, suggesting exponential scaling of the IBI with time. The red line in each  
366 plot represents the best fit for the detected IBI; linear function (middle panel) and exponential  
367 function providing a linear relationship on a semi-log plot (bottom panel). The root mean square  
368 error (RMSE) between the data points and fitted function is shown in each window. The  
369 exponential function fit yielded a smaller RMSE compared to the linear, logarithmic or square  
370 root fits (see Methods), providing quantitative confirmation that at the end of the simulated SLE,  
371 the IBI duration increased exponentially with time. **(B)** The evolution of the IBI during the SLE  
372 induced by application of bicuculline in the whole-brain *in vitro* preparation (Boido et al., 2014;  
373 Gnatkovsky et al., 2008). **(C)** IBI evolution during a seizure recorded with intracerebral  
374 electrodes positioned in the temporal lobe in a patient submitted to presurgical evaluation  
375 (courtesy of Laura Tassi, Epilepsy Surgery Center, Niguarda Hospital, Milano, Italy). In **B** and  
376 **C**, the detected IBI lay on a straight line on the semi-log plot and the exponential fit resulted in  
377 a smaller RMSE compared to the linear, logarithmic or square root fits, validating the model  
378 prediction of an exponential increase in the IBI at the end of a seizure. Only linear and  
379 exponential fits are shown. The results for all considered fits are provided in Figure 6 – source  
380 data 1.

### 381 *The postictal period*

382 An additional model prediction concerned the postictal period which is characterized by reduced  
383 excitability and firing. As shown in Figure 2A–C, after the termination of an SLE there was an  
384 approximate 90-second period during which firing was either absent or reduced with respect to  
385 the interictal period. The exact duration of the postictal period was difficult to assess, as the gap  
386 in firing after the SLE was dependent on background fluctuations. To directly investigate the  
387 network excitability, we analyzed the responsiveness of the model to external periodic  
388 stimulation (see Boido et al. (2014)). The background noise was removed and was compensated  
389 with a steady depolarizing current, as in Figure 6. Stimulation was delivered by activating the  
390 excitatory synapses every 5 seconds at each PY soma (arrows in Figure 7B). The amplitude of  
391 the excitatory postsynaptic current was set at just above the threshold for triggering the spike in  
392 the interictal period (before the timestamp at 60 seconds). The external stimulation triggered a  
393 burst and two single spike responses after the SLE termination (Figure 7, vertical broken line)  
394 and failed to trigger a suprathreshold response for approximately 90 seconds afterwards. In line  
395 with the PY response pattern, no response to the simulated stimulation was observed in the LFP

396 signal during the postictal suppression period (Figure 7A). The high excitability immediately  
397 after termination of the SLE (timestamps between seconds 110 and 125) was correlated with  
398 elevated  $[K^+]_o$  which was present shortly after the SLE (Figure 7C). The subsequent postictal  
399 reduction of excitability was associated with decay of  $[K^+]_o$  and an increased hyperpolarizing  
400  $Na^+/K^+$ -pump current in somatic and dendritic compartments. The pump current decayed with a  
401 slower time constant associated with a gradual clearance of  $[Na^+]_i$  by the pump (Figure 7DE).

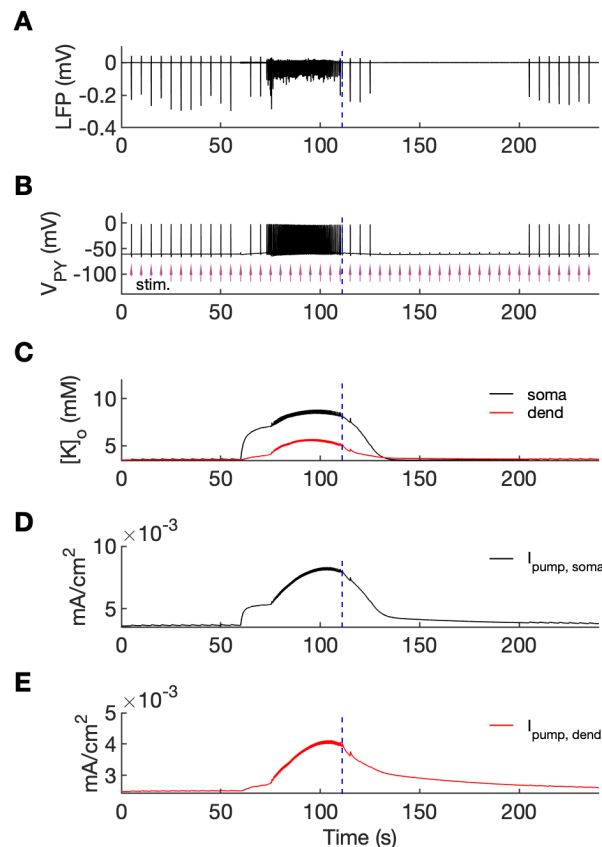

402  
403 **Figure 7. An analysis of network excitability in the postictal period.** In this figure, the  
404 background input was removed from the simulation and compensated with a small depolarizing  
405 current injected into the PY cells, as in Figure 6. (A) The LFP signal. (B) The PY cell membrane  
406 potential with external periodic stimulation delivered every 5 seconds, marked by the arrows  
407 (violet, stim.). The amplitude of the stimulation was set at just above the threshold for triggering  
408 a spike in the interictal period. (C) The extracellular potassium in the somatic and dendritic  
409 compartments. (D and E) The net  $Na^+/K^+$ -pump current in the somatic and dendritic  
410 compartment, respectively. The vertical broken line (blue) in all panels marks the SLE offset  
411 time without periodic stimulation. Immediately after termination of the SLE, the network was  
412 still excitable due to increased  $[K^+]_o$ . Shortly afterward, the excitability decreased due to an

413 increased  $\text{Na}^+/\text{K}^+$ -pump current that outlasted the increase in  $[\text{K}^+]_o$ . Increased  $I_{\text{pump}}$  and decreased  
414  $[\text{K}^+]_o$  which occurred shortly after the termination of the SLE, led to a postictal period during  
415 which the network did not respond to external stimulation for approximately 90 seconds.

## 416 **Discussion**

417 The present study aimed to better define the mechanisms underlying focal seizures. The ictal  
418 pattern most frequently observed in human and experimental TLE, i.e., the LVF onset pattern,  
419 exhibits a stereotypical sequence of fast activity, irregular spiking and periodic bursting (as  
420 shown in Figure 3A, first panel) (Avoli et al., 2016; de Curtis & Avoli, 2016; Devinsky et al.,  
421 2018; Velasco et al., 2000). We successfully reproduced this pattern in the computer model by  
422 transiently increasing the firing of the IN. After this trigger, the simulated SLE phases evolved  
423 autonomously. Our study suggests that various seizure phases and transitions from one phase to  
424 another are mediated by feedback mechanisms between neuronal activities, ion concentration  
425 changes and ion homeostasis processes. The distinct mechanisms that shape the activities at  
426 various seizure stages are discussed below.

### 427 **Seizure initiation**

428 There is increasing evidence showing that seizures with LVF onset are initiated by discharges of  
429 fast-spiking GABAergic interneurons (de Curtis & Avoli, 2016; de Curtis & Gnatkovsky, 2009;  
430 Devinsky et al., 2018). Increased interneuron discharges and decreased PY activity around the  
431 time of seizure onset were first evidenced in *in vitro* and *in vivo* animal models (Gnatkovsky et  
432 al., 2008; Grasse et al., 2013; Lévesque et al., 2016; Lopantsev & Avoli, 1998; Miri et al., 2018;  
433 Toyoda et al., 2015; Ziburkus et al., 2006). A similar scenario was observed with single-unit  
434 recordings performed during intracerebral presurgical monitoring in neocortical and temporal  
435 lobe epilepsy patients (Elahian et al., 2018; Truccolo et al., 2011). Causal relationship between  
436 increased interneuron firing and ictogenesis may include intracellular chloride accumulation  
437 resulting in a shift in  $E_{\text{GABA}_a}$  and/or the elevation of  $[\text{K}^+]_o$ , which leads to subsequent  
438 depolarization of PY cells and seizure development (Magloire, Mercier, et al., 2019). The  
439 hypothesis suggested by Jensen & Yaari (1997) that seizure initiation is related to an elevation  
440 in  $[\text{K}^+]_o$  caused by a strong initial discharge has been tested in computational models with ion  
441 concentration changes. In these simulations, seizure-like activity has been induced by DC  
442 stimulation of the PY cells alone (Bazhenov et al., 2004; Buchin et al., 2016; Kager et al., 2002),

443 by a brief increase in  $[K^+]_o$  (Fröhlich et al., 2006), by stimulation of the IN and PY cells (Ho &  
444 Truccolo, 2016) or by varying the extracellular concentration of  $K^+$  and  $O_2$  (Wei, Ullah, & Schiff,  
445 2014). However, as mentioned above, transitions to spontaneous seizures that begin with LFV  
446 pattern were not associated with increased excitatory activity, but with increased firing of  
447 inhibitory interneurons. Pyramidal cell – interneuron interplay during SLE was first investigated  
448 in the computational model of Wei, Ullah, Ingram, et al. (2014) which mimicked 4-  
449 aminopyridine (4-AP) and decreased magnesium *in vitro* conditions (Ziburkus et al. 2006). They  
450 showed that when potassium diffusion rate around the IN was lower than around the PY cell, the  
451 IN depolarized and increased its activity and eventually entered depolarization block giving way  
452 to the strong firing of the PY cell during an SLE. The following *in silico* tests on seizure initiation  
453 by selective involvement of fast-spiking interneurons were conducted by us (Gentiletti et al.,  
454 2017) and others (González et al., 2018). We demonstrated that an increase in interneuron firing  
455 triggered a transition to a self-sustained SLE during which both IN and PY cells were active  
456 simultaneously. González et al. (2018) showed that interneuron stimulation by current pulses led  
457 to the development of an SLE via a gradual increase in  $[K^+]_o$  mediated the KCC2 cotransporter.  
458 Activation of the KCC2 pump was  $[Cl^-]_i$  dependent, while  $[K^+]_o$  influenced cotransporter time  
459 constant.

460 In the current study, an SLE was initiated by increased IN firing rate in response to  
461 depolarizing current injection. We didn't attempt to demonstrate the mechanism leading to  
462 increase in IN activity following bicuculline application in the isolated guinea pig brain, as the  
463 mechanisms underlying this phenomenon are not fully understood. A decrease in GABA<sub>A</sub>  
464 conductance by bicuculline likely affects interneuron-interneuron inhibition more than  
465 interneuron-principal cell inhibition (Gnatkovsky et al., 2008). Accordingly, reciprocal release  
466 of inhibition between the IN cells (i.e., disinhibition) may lead to preictal interneuronal spikes  
467 contributing to increase in extracellular potassium. It would further depolarize interneuronal  
468 network and initiate SLE (de Curtis & Avoli, 2016; Figure 4). In an alternative scenario,  
469 increased excitability of interneurons could lead to a transition in a bistable IN network, from  
470 asynchronous low firing mode to synchronous high firing rate mode due to small perturbation  
471 (Rich et al., 2020). In order to fully investigate these effects using a model, one should consider  
472 extended interneuronal network with mutual inhibitory interactions. In the current study we  
473 focused on SLE initiation mediated by increased discharge of interneurons, without simulating  
474 the underlying processes. It makes the model more general and corresponding to commonly  
475 observed paradoxical increase in GABAergic cell firing at the LVF seizure onset. In our present

476 model, the IN was activated by a depolarizing, decreasing current ramp of 40 seconds. The IN  
477 discharge initially led to the silencing of the PY cells, which was correlated with low amplitude  
478 fast activity in the LFP signal. The sustained interneuron activity caused a gradual increase in  
479  $[Cl^-]_i$  and  $[K^+]_o$  in the PY cells. The increase in  $[K^+]_o$  produced a positive shift in the  $K^+$  reversal  
480 potential which led to a reduction in the  $K^+$  leak current and membrane depolarization. The  
481 accumulation of  $[Cl^-]_i$  increased the  $Cl^-$  reversal potential and decreased the driving force of the  
482  $Cl^-$  ions, which led to a reduction in GABA<sub>A</sub> IPSC and the  $Cl^-$  leak current. A depolarization in  
483 the  $E_K$ ,  $E_{Cl}$  and  $E_{GABA_A}$ , and a weakening of the associated hyperpolarizing currents resulted in a  
484 gradual depolarization of the PY cells and sustained firing, which was correlated with the tonic  
485 SLE phase.

486 To address the role of potassium and chloride accumulation in seizure initiation, we  
487 considered the elevation of  $[K^+]_o$  and  $[Cl^-]_i$  separately. As shown in Figure 5, a selective increase  
488 in  $[K^+]_o$  with a fixed concentration of  $Cl^-$  did not trigger full SLE. When  $[Cl^-]_i$  was increased and  
489 the concentration of  $K^+$  remained fixed at the reference level the PY cells exhibited normal  
490 background firing (not shown). This suggests that in our model a change in both  $[K^+]_o$  and  $[Cl^-]_i$   
491 act in synergy to mediate full SLE. These findings corroborate the results of a study by Alfonsa  
492 et al. (2015) which demonstrated that optogenetic chloride loading of PY cells did not trigger  
493 ictal events, while the addition of a subictal dose of 4-AP led to full ictal activity. Our results  
494 don't contradict *in vitro* experimental observations that elevated  $[K^+]_o$  alone is sufficient to  
495 induce epileptiform activity (Jensen & Yaari, 1997; Traynelis & Dingledine, 1988). As shown  
496 by a bifurcation diagram (Figure 4A and Appendix I – figure 1) an increase in  $[K^+]_o$  may lead to  
497 a transition from a silent state to tonic and burst firing.

498 Although in our model chloride accumulation increased  $E_{GABA_A}$  and lowered synaptic  
499 inhibition contributing to full-blown SLE, we didn't observe depolarizing GABA responses as  
500 seen in some *in vitro* studies (Cossart et al., 2005; Miles et al., 2012; Ellender et al., 2014). It  
501 should be kept in mind that depolarizing GABA responses were found mainly in immature  
502 neurons, which have more depolarized  $Cl^-$  gradient (Cherubini et al., 1991). Another possible  
503 explanation of the limited shift in  $E_{GABA_A}$  in the model may be related to somatic localisation of  
504 inhibitory input from the IN. Following the observation that activation of parvalbumin-positive  
505 (PV) interneurons was implicated in spontaneous seizures (Toyoda et al., 2015) we simulated  
506 soma-targeting, PV interneurons but not dendrite-targeting, somatostatin-expressing (SST)  
507 interneurons. To see if a more pronounced shift in  $E_{GABA_A}$  could be observed in SST interneuron

508 mediated dendritic responses we reduced the size of all model compartments to account for distal  
509 dendrites. Under these conditions, strong activation of inhibitory interneuron as in Kaila et al.  
510 (1997) led to biphasic, hyperpolarizing-depolarizing GABA<sub>A</sub> response shown in Appendix I –  
511 figure 3. These results are in agreement with other studies suggesting that  $[Cl^-]_i$  can change  
512 rapidly and contribute to depolarizing GABA<sub>A</sub> responses especially in the structures with low  
513 volume to GABA<sub>A</sub> receptor density ratio (Staley et al., 1995; Staley & Proctor, 1999).

514 The observation that the development of seizures may be related to an increase in  $[K^+]_o$   
515 beyond the physiological values suggests that the modulation of  $[K^+]_o$  by the use of  $K^+$  chelators  
516 is a potential strategy for the control of seizures. In our previous work, we demonstrated that an  
517 artificial potassium buffer, which mimicked the function of astrocytes by balancing neuronal  $K^+$   
518 release, could reduce neuronal excitability and prevent an SLE (Suffczynski et al., 2017).

### 519 **The mechanisms of $[K^+]_o$ accumulation**

520 A question arises: what causes  $[K^+]_o$  accumulation? The buildup of  $Cl^-$  inside the PY neurons  
521 during interneuron-induced GABA release results in the activation of the KCC2 cotransporter,  
522 which extrudes  $Cl^-$  and  $K^+$  into the extracellular space. This hypothesis is supported by *in vitro*  
523 experiments which showed that activation of GABA<sub>A</sub> receptors led to an increase in  $[K^+]_o$  and  
524 cell depolarization, which were eliminated by the KCC2 inhibitor, furosemide (Viitanen et al.,  
525 2010). The above-mentioned hypothesis is also consistent with the findings that the application  
526 of the KCC2 blockers VU0240551 and bumetanide prevented SLEs during 4-AP application in  
527 rat brain slices (Hamidi & Avoli, 2015). However, it is not clear whether the ictal activity is  
528 consistently based on  $K^+$  efflux through KCC2. In the pilocarpine model, the enhancement of  
529 KCC2 in principal cortical neurons is associated with a reduction in seizure duration (Magloire,  
530 Cornford, et al., 2019). Based on these results, the authors suggested that KCC2 activity does  
531 not affect seizure initiation, but influences seizure maintenance during a prolonged period of  $Cl^-$   
532 accumulation. The antiepileptic role of enhanced KCC2 activity has also been suggested by  
533 Moore et al. (2018), who showed that KCC2 potentiation delayed the onset of an SLE after 4-  
534 AP application *in vitro* and reduced the severity of kainate-induced seizures *in vivo*. When  
535 considering the role of KCC2 in  $[K^+]_o$  and  $[Cl^-]_i$  accumulation, it is necessary to note that the  
536 direction and magnitude of KCC2 transport depend on the concentration gradients of  $Cl^-$  and  $K^+$   
537 (Kaila et al., 2014). Under normal conditions, when  $[K^+]_o$  is sufficiently controlled by  
538 homeostatic mechanisms, GABAergic activity leads to the extrusion of  $Cl^-$  and  $K^+$  by KCC2.  
539 However, an increase in  $[K^+]_o$  may reverse the  $K^+-Cl^-$  cotransport, thus contributing to  $[K^+]_o$ .



540 buffering rather than accumulation (Payne, 1997; Thompson & Gahwiler, 1989) The activation  
541 of IN in our model led to a rapid increase in  $[K^+]_o$  in the narrow extracellular interstitial  
542 compartments, while intracellular  $Cl^-$  accumulation was more gradual (Figure 2). This generated  
543 an influx of  $K^+$  and  $Cl^-$  via KCC2 (Figure 5B), which led to  $[K^+]_o$  buffering and  $[Cl^-]_i$   
544 accumulation. The exclusion of KCC2 involvement in the increase in  $[K^+]_o$  suggests that the  
545 primary mechanism of  $[K^+]_o$  accumulation in our model was due to other processes, such as the  
546 outward  $K^+$  current that repolarizes action potentials in activated IN and PY cells. This  
547 observation is consistent with *in vivo* experimental evidence that showed a significant local  $[K^+]_o$   
548 rise due to increased spiking activity following electrical stimulation of the cat cerebral cortex  
549 (Heinemann & Lux, 1975).

550 It is worth noting that in our model KCC2 resumes extruding  $Cl^-$  shortly after SLE  
551 termination (Figure 5B). Accordingly,  $[Cl^-]_i$  build up is observed over the whole SLE.  
552 Intracellular chloride imaging during SLE induced *in vitro* by  $Mg^{2+}$ -free solution showed that  
553  $[Cl^-]_i$  started to decline before the end of SLE (Raimondo, 2013), while during SLE induced *in*  
554 *vivo* by 4-AP  $[Cl^-]_i$  recovery begun instantly after SLE offset (Sato et al., 2017). These dissimilar  
555 observations might be related to distinct firing patterns of inhibitory and excitatory neurons in  
556 4-AP and low  $Mg^{2+}$  seizure models (Codadu et al., 2019), which in turn could lead to different  
557  $Cl^-$  and  $K^+$  and accumulation patterns.

## 558 **The tonic-to-bursting transition**

559 Potassium ions released by interneuron discharges initially diffused to the somatic extracellular  
560 compartments of the PY cells and contributed to PY soma depolarization and tonic firing, as  
561 described above. The initial fast rise of  $[K^+]_o$  in the somatic compartment and slower rise in  
562 dendritic segment (Figure 2D) was related to the localization of inhibitory neuron near the PY  
563 soma. Subsequently,  $K^+$  diffusion from the somatic to dendritic compartments promoted  
564 regenerative dendritic spikes in PY cells. In the model, the dendritic conductance of voltage-  
565 gated  $K^+$  currents associated with spiking was about 10% of the somatic conductance (Fransen  
566 et al., 2002) hence release of  $K^+$  ions into the dendritic interstitial space was smaller than in the  
567 somatic compartment. On the other hand, radial diffusion and glial buffering processes had the  
568 same efficiency in both compartments maintaining lower dendritic  $[K^+]_o$ . This model prediction  
569 appears to agree with experimental data of simultaneous recordings of  $[K^+]_o$  in somatic and  
570 dendritic layers during hippocampal seizures in anesthetized rats. During paroxysmal firing



571 induced by electrical stimulation,  $[K^+]_o$  in dentate gyrus reached significantly higher levels in  
572 cell body layers than in the layers containing dendrites (Somjen & Giacchino, 1985). High  $[K^+]_o$   
573 in the soma and moderately increased  $[K^+]_o$  in dendrites favored burst firing (Figure 4A and  
574 Appendix I – figure 1) through the reduction of repolarizing  $K^+$  currents, the activation of a  $Na^+$   
575 persistent current, and a shift from spike after-hyperpolarization toward depolarizing after-  
576 potentials. Prolonged depolarization led to the activation of slow M-type  $K^+$  conductance  
577 (Appendix I – figure 2), which hyperpolarized the PY cells after a series of fast spikes. The  
578 bursting mechanism in our model originated from currents used in the original entorhinal cortex  
579 cells model (Fransen et al., 2002) and was similar to the mechanism in CA1 neurons (Golomb  
580 et al., 2006).

581 We note that in our model a transition from resting to tonic and then to bursting activity  
582 in PY cells was not critically dependent on perisomatic inhibition and would be also observed if  
583 we simulated dendrite-targeting, SST interneurons. As shown by the bifurcation diagram in  
584 Figure 4A (first panel) an increase in either somatic or dendritic  $[K^+]_o$  may lead to a transition  
585 from rest to tonic spiking and then bursting. This observation is in agreement with the study  
586 showing that optogenetic activation of either PV or SST inhibitory interneurons can trigger SLE  
587 (Yekhlef et al., 2015).

## 588 **Seizure termination**

589 Various mechanisms underlying seizure termination have been suggested (Lado & Moshé, 2008;  
590 Zubler et al., 2014), however, researchers have not yet reached a consensus regarding which one  
591 plays a dominant role. In our model, the SLE terminated spontaneously. Following the fast-slow  
592 analysis approach (Fröhlich et al., 2006) we created a simplified model in which  $[K^+]_{o,soma}$ ,  
593  $[K^+]_{o,dend}$  together with  $[Na^+]_{i,soma}$  and  $[Na^+]_{i,dend}$  were treated as control parameters. Hence, the  
594 influence of neuronal activity on ionic variations was removed and the dependence of network  
595 activity on  $K^+$  and  $Na^+$  concentrations was analyzed (Figure 4A). When the time course of the  
596 concentration changes of these two ions were tuned to reproduce the decrease in  $[K^+]_o$  and  
597 maintained increased level of  $[Na^+]_i$  observed in the late SLE phase, the ictal activity  
598 spontaneously terminated (Figure 4B). This indicates that SLE cessation in the model can be  
599 explained by two coincident factors, namely the decrease in  $[K^+]_o$  during stable levels of  
600 increased  $[Na^+]_i$ . An increase in  $[Na^+]_i$  led to an increased hyperpolarizing  $Na^+/K^+$ -pump current,  
601 which increased the firing threshold in the neurons. The increased pump activity also contributed

602 to a progressive decrease in  $[K^+]_o$ . Potassium repolarization currents increased after each burst  
603 and eventually prevented the initiation of a new cycle of the oscillation. The idea that negative  
604 feedback between  $[Na^+]_i$  accumulation and neuronal firing is responsible for seizure termination  
605 was first formulated by Jensen & Yaari (1997). Even though it has not been tested  
606 experimentally, this hypothesis is consistent with the observation that the inhibition of  $Na^+/K^+$ -  
607 pump activity occurring during hypoxia prolongs SLE discharges and shortens post-SLE period  
608 in hippocampal slices with blocked synaptic transmission (Haas & Jefferys, 1984). It was also  
609 observed that a decrease in  $Na^+$  channel conductance via the antiepileptic drug phenytoin,  
610 increased the seizure threshold but prolonged the afterdischarges and seizure durations in the rat  
611 kindling model of epilepsy (Ebert et al., 1997). In the computational model developed by the  
612 Bazhenov team (Krishnan et al., 2015; Krishnan & Bazhenov, 2011) and Chizhov et al. (2018),  
613 a progressive increase in  $[Na^+]_i$  and activation of the electrogenic  $Na^+/K^+$ -pump were identified  
614 as the primary factor of SLE termination. The seizure termination mechanism in the above-  
615 mentioned studies is similar to the mechanism observed in the present study, even though  
616 different specifications of neuronal mechanisms, network characteristics and seizure  
617 morphologies were used.

618 It should be also noted that activation of the  $Na^+/K^+$ -pump by  $[Na^+]_i$  is not the only  
619 proposed mechanism of seizure termination. An alternative mechanism, also linked to an  
620 increase in  $[Na^+]_i$ , is dependent on the  $Na^+$ -activated  $K^+$  channels (Igelström, 2013). Moreover,  
621 many other mechanisms such as acidosis (Ziemann et al., 2008), the upregulation of inhibitory  
622 neurons (Wen et al., 2015), glutamate depletion (Lado & Moshé, 2008), the depolarization block  
623 of neurons mediated by  $K^+$  release from astrocytes (Bragin et al., 1997), after-hyperpolarization  
624 due to  $K^+$  channels (Timofeev & Steriade, 2004), postburst depression (Boido et al., 2014),  
625 increased synchrony (Schindler et al., 2007) and the release of adenosine (During & Spencer,  
626 1992; Uva & de Curtis, 2020) have been suggested to play a role in seizure termination.

627 The abrupt termination of a seizure across the entire brain (Salami et al., 2022) requires  
628 long-range communication which may involve thalamocortical interactions (Aracri et al., 2018;  
629 Evangelista et al., 2015), travelling waves (Martinet et al., 2017; Proix et al., 2018) and ephaptic  
630 interactions (Jefferys, 1995; Shivacharan et al., 2019). Multiple neuromodulatory, ionic, synaptic  
631 and neuronal components likely cooperate to terminate a seizure. Further insight into these  
632 mechanisms may be obtained by their selective blockage (Uva & de Curtis, 2020), the tracking

633 of EEG signal changes as seizure offset approaches (Boido et al., 2014; Saggio et al., 2020) and  
634 from analysis of the duration of postictal suppression (Payne et al., 2018).

### 635 **Frequency Slowing**

636 The approach of seizure termination is often (but not always) accompanied by an increase in the  
637 intervals between successive bursts that form the late seizure phase. Saggio et al. (2020) analyzed  
638 frequency slowing in human focal onset seizures and estimated that approximately 40%  
639 exhibited unequivocal discharge slowing down toward the end. Burst frequency slowing was  
640 confirmed in a study on the entorhinal cortex of the isolated brain preparation during bicuculline-  
641 and 4AP-induced SLE (Boido et al., 2014). Our model prediction of the exponential increase in  
642 the IBI toward the SLE offset (Figure 6A) was confirmed with experimental data (Figure 6BC).  
643 These findings are also consistent with those of Bauer et al. (2017), which demonstrated that  
644 inter-burst intervals in focal epilepsy patients were predominantly described by the exponential  
645 scaling law. Conversely, it has been suggested that depending on the bifurcation which leads to  
646 seizure termination, the burst oscillation frequency can be constant or decrease according to the  
647 logarithmic or square root relationship (Izhikevich, 2000; Jirsa et al., 2014). This theory has not  
648 been confirmed by our model and experimental seizure data (Figure 6). On the other hand, when  
649 specific ion types were varied linearly and led to linearly decreasing membrane current (not  
650 shown), logarithmic increase in IBI was observed (Figure 6 – figure supplement 1BC). It shows  
651 that when the assumption of slow linear membrane current dynamics was satisfied, the IBI  
652 evolved according to the bifurcation theory. However, when various processes influenced  
653 seizure termination and the current changed non linearly, the IBI slowing deviated from the  
654 predicted scaling laws.

655 In our model, progressive decrease in neuronal excitability related to simultaneous  
656 decrease in  $[K^+]_o$  and increase in  $[Na^+]_i$ , was responsible for the IBI slowing towards an SLE  
657 end. Alternative explanations for the increasing inter-burst intervals have been proposed. Bauer  
658 et al. (2017) included a plasticity parameter that progressively decoupled spatially distributed  
659 neural mass units based on the synchrony level. This mechanism accounted for seizure  
660 termination, exponential IBI increase and the presence of a transient postictal state. In the model  
661 of Liou et al. (2020) the IBI was constant during seizure expansion and only when the spatial  
662 propagation of ictal discharge ceased, the seizure entered the pre-termination stage with a  
663 slowing-down trend. An increase in the IBI in this phase was related to the recovery of inhibition

664 and restoration of the  $\text{Cl}^-$  concentration gradient. These studies indicate that spatial properties  
665 related to seizure propagation and synchrony are other factors that may affect the evolution of  
666 the IBI.

### 667 **The postictal period**

668 Seizures are followed by the suppression of physiological rhythms known as postictal EEG  
669 suppression (PES) that lasts for seconds or minutes (Pottkämper et al., 2020). Using the  
670 stimulation protocol, we investigated the duration of PES in the model. Our results showed that  
671 shortly after termination of the SLE, burst responses were still triggered, however, after few  
672 seconds, the excitability decreased and remained reduced for approximately 90 seconds (Figure  
673 7B). The PES duration in our model is consistent with a typical ‘seconds to minutes’ timescale  
674 although available estimates depend on the PES duration assessment method. In single-unit  
675 recordings in epileptic patients with neocortical seizures neuronal spiking was fully suppressed  
676 for 5 to 30 seconds after seizure termination (Truccolo et al., 2011). Average duration of postictal  
677 suppression based on EEG features in focal seizure patients was estimated at 17 s (Grigorovsky  
678 et al., 2020; Table 1), 120 s (D. E. Payne et al., 2018; Table 1) and around 50-100 s (Bauer et  
679 al., 2017; Figure 5). Our *in silico*-derived prediction that postictal ‘silence’ depends on the  
680 increased rate of hyperpolarizing  $\text{Na}^+/\text{K}^+$ -pump has been previously suggested (Fisher &  
681 Schachter, 2000) and simulated (Krishnan et al., 2015; Krishnan & Bazhenov, 2011). In these  
682 models, postictal state was generated via both, reduced  $[\text{K}^+]_o$  to below baseline level and  
683 increased  $[\text{Na}^+]_i$  after termination of an SLE.  $[\text{K}^+]_o$  decrease below baseline resulted in a negative  
684 shift in  $E_K$  and membrane hyperpolarization, while elevated  $[\text{Na}^+]_i$  increased  $\text{Na}^+/\text{K}^+$ -pump  
685 hyperpolarizing current. A below-reference value of  $[\text{K}^+]_o$  was indeed observed after seizure  
686 termination (Heinemann et al., 1977). On the other hand, in other studies,  $[\text{K}^+]_o$  decayed to  
687 baseline level after an SLE offset (Fisher et al., 1976; Futamachi et al., 1974) and couldn’t  
688 contribute to the postictal state. Also in our model  $[\text{K}^+]_o$  undershoot was not observed (Figure  
689 7C), suggesting that the main cause of postictal reduction in excitability was hyperpolarizing  
690 effect of the  $\text{Na}^+/\text{K}^+$ -pump current, which remained elevated above baseline for about 100 s after  
691 SLE termination (Figure 7DE). The findings generated by our computational model suggest that  
692 ion homeostatic processes activated and sustained by the excessive seizure discharges provide a  
693 negative feedback mechanism, eventually leading to the cessation of the seizure itself and to the  
694 restoration of the normal state after a transitional period of postictal silence.

## 695 **Methods**

### 696 **Geometry**

697 The cell morphology was based on entorhinal cortex PY cells and an interneuron model (Fransen  
698 et al., 2002), further reduced to equivalent cylinder models. The PY consisted of two  
699 compartments: a soma with a length of 20  $\mu\text{m}$  and a diameter of 15  $\mu\text{m}$ , and a dendrite with a  
700 length of 450  $\mu\text{m}$  and a diameter of 6.88  $\mu\text{m}$ . The interneuron only had a somatic compartment  
701 with a length of 20  $\mu\text{m}$  and a diameter of 15  $\mu\text{m}$ . Each compartment was surrounded by its own  
702 extracellular space (ECS). The extracellular compartments were embedded in a common bathing  
703 medium which represented the surrounding neural tissue and vasculature. The size of the ECS  
704 was estimated by the extracellular volume fraction,  $\alpha$  defined as the ratio volume of extracellular  
705 space/volume of tissue. We used  $\alpha = 0.131$  which corresponded to the CA1 *st. pyramidale* and  
706 a  $\text{K}^+$  concentration of 3.5 mM (McBain et al., 1990).

### 707 **Biophysics**

708 The active membrane currents in the PY were the fast  $\text{Na}^+$  and  $\text{K}^+$  currents ( $I_{\text{Na}}$  and  $I_{\text{Kdr}}$ ,  
709 respectively) in both compartments and were responsible for action potential generation; a  
710 persistent  $\text{Na}^+$  current,  $I_{\text{NaP}}$  in the soma; a high-threshold  $\text{Ca}^{2+}$  current,  $I_{\text{CaL}}$  in both compartments;  
711 a calcium-dependent after-hyperpolarization  $\text{K}^+$  current,  $I_{\text{KAHP}}$  in both compartments; a fast  
712 calcium- and voltage-dependent  $\text{K}^+$  current,  $I_{\text{KC}}$  in both compartments; and a noninactivating  
713 muscarinic  $\text{K}^+$  current,  $I_{\text{KM}}$  in the soma. The IN included only the  $I_{\text{Na}}$  and  $I_{\text{Kdr}}$  currents responsible  
714 for spike generation. All the equations for the active currents were initially based on those  
715 described by Fransen et al. (2002), however, an additional modification of the parameters  
716 described below was required to account for ionic regulation mechanisms. Simulations were  
717 performed using the NEURON simulator with a fixed integration step of 0.05 ms.

718

#### 719 *Passive properties*

720 The reversal potentials were obtained via the Nernst equation:

$$721 \quad E_x = 2.3 \frac{RT}{zF} \log \left( \frac{[X]_o}{[X]_i} \right)$$

722 where  $[X]_i$  and  $[X]_o$  are intra- and extracellular concentrations, respectively, of the ions.  $X =$   
723  $\{\text{Na}^+, \text{K}^+, \text{Ca}^{2+}, \text{Cl}^-, \text{HCO}_3^-\}$ ,  $F$  is the Faraday constant,  $R$  is the gas constant,  $z$  is the valence of

724 the ions and  $T = 273,16 + 32$  is the absolute temperature (Gnatkovsky et al., 2008). A leak  
725 current,  $I_{leak}$ , was present in all compartments of both cells and was a sum of the leak currents of  
726  $\text{Na}^+$ ,  $\text{K}^+$  and  $\text{Cl}^-$ , modelled as:

$$727 \quad I_{i,leak} = g_{i,leak}(V - E_i)$$

728 where  $g_{i,leak}$  is the leak current conductance of the ion of interest  $i = \{\text{Na}^+, \text{K}^+, \text{Cl}^-\}$ . The resting  
729 membrane potential was -61 mV in the pyramidal cell and in the interneuron. The specific axial  
730 resistance in both cells was set to  $R_a = 100 \text{ Ohm} \cdot \text{cm}$  and the specific membrane capacitance was  
731 set to  $C_m = 1 \mu\text{F}/\text{cm}^2$ , as in Fransen et al. (2002). Based on the  $R_a$  and PY cell geometry, the  
732 somato-dendritic coupling conductance,  $g_c$ , was calculated as 1.5 mS.

733

### 734 *Active currents*

735 The original equations used time constant units in seconds (s) and voltage units in volts (V), with  
736 0 V corresponding to the resting membrane potential. All equations were modified to account  
737 for the millivolt (mV) and millisecond (ms) units used in our model and the voltage was shifted  
738 by -60 mV to correspond to the membrane potential relative to the extracellular space, which  
739 was assumed to be 0 mV. Additional modifications of the parameters were required to account  
740 for the ionic regulation mechanisms that were not present in the original model.  $I_{NaP}$ : the  
741 activation gate exponent was 2 and the inactivation gate time constant,  $\tau_h$ , was estimated by  
742 fitting the activation function form described by Fransen et al. (2002) to the experimental data  
743 (Magistretti & Alonso, 1999).  $I_{Kdr}$ : the steady-state activation function,  $n_{inf}$ , and the activation  
744 gate time constant,  $\tau_n$ , were estimated by empirical fit to the experimental data (Sah et al., 1988).  
745 To increase the firing threshold, the activation curve was shifted toward positive potentials by  
746 18 mV in the soma and 10 mV in the dendrites. The model generated spontaneous fast spiking  
747 otherwise.  $I_{KAHP}$ ,  $I_{KC}$ : these  $\text{Ca}^{2+}$ -dependent currents were modelled according to the model  
748 described by Traub et al. (2003) and were implemented in ModelDB  
749 (<https://senselab.med.yale.edu/ModelDB/>), accession number 20756. Due to the arbitrary units  
750 for  $\text{Ca}^{2+}$  concentration in Traub's model, we modified the current formula to correspond to mM  
751 units and resting level of  $[\text{Ca}^{2+}]_i$  used in our model. In pyramidal cells, the soma and dendrite  
752 membrane potentials,  $V_s$  and  $V_d$ , respectively, were governed by the following Hodgkin-Huxley  
753 equations:

$$754 \quad C \frac{dV_s}{dt} = -I_{Na,soma} - I_{NaP} - I_{Kdr,soma} - I_{CaL} - I_{KAHP} - I_{KC} - I_{KM}$$
$$755 \quad - I_{leak} - I_{NaKpump} - I_{Capump} - g_c(V_s - V_d) - I_{syn}$$

756  $C \frac{dV_d}{dt} = -I_{Na,dend} - I_{Kdr,dend} - I_{CaL} - I_{KAHP} - I_{KC} - I_{NaKpump} - I_{CaPump} - g_c(V_d - V_s)$

757  $- I_{syn}$

758 Transient sodium current

759  $I_{Na,soma} = g_{Na,PYsoma} m^3 h (V - E_{Na})$

760  $I_{Na,dend} = g_{Na,PYdend} m^2 h (V - E_{Na})$

761 Persistent sodium current:

762  $I_{NaP} = g_{NaP} m^2 h (V - E_{Na})$

763 Delayed rectifier:

764  $I_{Kdr,soma} = g_{Kdr,PYsoma} n^4 (V - E_K)$

765  $I_{Kdr,dend} = g_{Kdr,PYdend} n^2 (V - E_K)$

766 High-threshold  $Ca^{2+}$  current:

767  $I_{CaL} = g_{CaL} m^2 (V - E_{Ca})$

768  $Ca^{2+}$ -dependent  $K^+$  (afterhyperpolarization) current:

769  $I_{KAHP} = g_{KAHP} m (V - E_K)$

770 Fast  $Ca^{2+}$ - and voltage-dependent  $K^+$  current

771  $I_{KC} = g_{KC} \min([Ca^{2+}]_i/250, 1) m (V - E_K)$

772 Muscarinic current:

773  $I_{KM} = g_{KM} m (V - E_K)$

774 Equations of gating variables are given in Table 1. Conductance values are given in Table 2.

775

776 Table 1. Gating variables of the ionic currents in pyramidal cell model

| Current           | Kinetics/time constant (ms)                                                   |                                                                            |
|-------------------|-------------------------------------------------------------------------------|----------------------------------------------------------------------------|
| $I_{Na,soma}$     | $\alpha_m = \frac{0.8(-V - 39.8)}{\exp\left(\frac{-V - 39.8}{4}\right) - 1}$  | $\beta_m = \frac{0.7(V + 14.8)}{\exp\left(\frac{V + 14.8}{5}\right) - 1}$  |
|                   | $\alpha_h = 0.32 \exp\left(\frac{-V - 15}{18}\right)$                         | $\beta_h = \frac{10}{\exp\left(\frac{-V - 15}{5}\right) + 1}$              |
| $I_{Na,dendrite}$ | $\alpha_m = \frac{0.32(-V - 48.9)}{\exp\left(\frac{-V - 48.9}{4}\right) - 1}$ | $\beta_m = \frac{0.28(V + 21.9)}{\exp\left(\frac{V + 21.9}{5}\right) - 1}$ |
|                   | $\alpha_h = 0.128 \exp\left(\frac{-V - 44}{18}\right)$                        | $\beta_h = \frac{4}{\exp\left(\frac{-V - 21}{5}\right)}$                   |



|                              |                                                                                      |                                                                                                                                                                                                                                                                                                                                                   |
|------------------------------|--------------------------------------------------------------------------------------|---------------------------------------------------------------------------------------------------------------------------------------------------------------------------------------------------------------------------------------------------------------------------------------------------------------------------------------------------|
| $I_{NaP}$                    | $m_{\infty} = \frac{1}{1 + \exp\left(\frac{-48.7 - V}{4.4}\right)}$                  | $\tau_m = \frac{1}{\frac{0.091(V + 38)}{1 - \exp\left(\frac{-V - 38}{5}\right)} - \frac{0.062(V + 38)}{1 - \exp\left(\frac{V + 38}{5}\right)}}$                                                                                                                                                                                                   |
|                              | $h_{\infty} = \frac{1}{1 + \exp\left(\frac{48.8 + V}{9.98}\right)}$                  | if $V_m \leq -60$ :<br>$\tau_m = 3700 + \frac{2000}{\frac{0.091(V+60)}{1 - \exp\left(\frac{-V-60}{5}\right)} - \frac{0.062(V+60)}{1 - \exp\left(\frac{V+60}{5}\right)}}$<br>if $V_m > -60$ :<br>$\tau_m = 1200 + \frac{8000}{\frac{0.091(V+74)}{1 - \exp\left(\frac{-V-74}{5}\right)} - \frac{0.062(V+74)}{1 - \exp\left(\frac{V+74}{5}\right)}}$ |
| $I_{Kdr,soma}$               | $n_{\infty} = \frac{1}{1 + \exp\left(\frac{-20.8 - V}{13.6}\right)}$                 | $\tau_m = \frac{1.6(C + \exp(\frac{V}{5}))}{D \exp(-\frac{V}{40})(C + \exp(\frac{V}{5})) + 0.016 \exp(\frac{V}{5})(64.9 + V)}$<br>$C = -0.00000230599; D = 0.0338338$                                                                                                                                                                             |
| $I_{Kdr,dend}$               | $n_{\infty} = \frac{1}{1 + \exp\left(\frac{-11.8 - V}{13.6}\right)}$                 | $\tau_m = \frac{1.6(C + \exp(\frac{V}{5}))}{D \exp(-\frac{V}{40})(C + \exp(\frac{V}{5})) + 0.016 \exp(\frac{V}{5})(64.9 + V)}$<br>$C = -0.00000230599; D = 0.0338338$                                                                                                                                                                             |
| $I_{CaL}$                    | $\alpha_m = \frac{1.6}{1 + \exp(-0.072(V - 5))}$                                     | $\beta_m = \frac{0.02(V + 8.9)}{\exp\left(\frac{V + 8.9}{5}\right) - 1}$                                                                                                                                                                                                                                                                          |
| $I_{KAHP}$                   | $\alpha_m = 2000([Ca]_i - [Ca]_{i,rest})$                                            | $\beta_m = 0.01$                                                                                                                                                                                                                                                                                                                                  |
| $I_{KC}$ , if $V_m \leq -10$ | $\alpha_m = \frac{\exp\left(\frac{V + 50}{11} - \frac{V + 53.5}{27}\right)}{18.975}$ | $\beta_m = 2 \exp\left(-\frac{V + 53.5}{27}\right) - \alpha_m$                                                                                                                                                                                                                                                                                    |
| $I_{KC}$ , if $V_m > -10$    | $\alpha_m = 2 \exp\left(-\frac{V + 53.5}{27}\right)$                                 | $\beta_m = 0$                                                                                                                                                                                                                                                                                                                                     |
| $I_{KM}$                     | $m_{\infty} = \frac{1}{1 + \exp\left(-\frac{V + 35}{5}\right)}$                      | $\tau_m = \frac{1000}{3.3 \left[ \exp\left(\frac{V+35}{40}\right) \right] + \left[ \exp\left(-\frac{V+35}{20}\right) \right]}$                                                                                                                                                                                                                    |

777  
778 Membrane potential of the interneuron was governed by the following Hodgkin-Huxley  
779 equations:

$$780 \quad C \frac{dV}{dt} = -I_{Na} - I_{Kdr} - I_{leak} - I_{NaKpump} - I_{syn} - I_{stim}$$

781 Current equations, kinetics and time constants of these currents were the same as in pyramidal  
782 cell soma. To prevent depolarization block of the IN during current stimulation, activation curve  
783 of  $I_{Na}$  was shifted 3 mV towards more negative potential values, while activation curve of  $I_{Kdr}$   
784 was shifted 19 mV towards more negative potential values.

785

786 Table2. Conductances used in the model

| Current conductance  | Description                                       | Values (S/cm <sup>2</sup> ) |
|----------------------|---------------------------------------------------|-----------------------------|
| $g_{Na,leak,PYsoma}$ | $I_{Na,leak}$ conductance in PY soma              | $1.5 \cdot 10^{-5}$         |
| $g_{Na,leak,PYdend}$ | $I_{Na,leak}$ conductance in PY dendrite          | $1.1 \cdot 10^{-5}$         |
| $g_{K,leak,PY}$      | $I_{K,leak}$ conductance in PY soma and dendrite  | $3 \cdot 10^{-5}$           |
| $g_{Cl,leak,PY}$     | $I_{Cl,leak}$ conductance in PY soma and dendrite | $1 \cdot 10^{-5}$           |
| $g_{Na,PYsoma}$      | $I_{Na}$ conductance in PY soma                   | 0.014                       |
| $g_{Na,PYdend}$      | $I_{Na}$ conductance in PY dendrite               | 0.0014                      |
| $g_{Kdr,PYsoma}$     | $I_{Kdr}$ conductance in PY soma                  | 0.032                       |
| $g_{Kdr,PYdend}$     | $I_{Kdr}$ conductance in PY dendrite              | 0.0032                      |
| $g_{NaP}$            | $I_{NaP}$ conductance in PY soma                  | $60 \cdot 10^{-5}$          |
| $g_{CaL}$            | $I_{CaL}$ conductance in PY soma and dendrite     | $15 \cdot 10^{-5}$          |
| $g_{KAHP}$           | $I_{KAHP}$ conductance in PY soma and dendrite    | $5 \cdot 10^{-5}$           |
| $g_{KC}$             | $I_{KC}$ conductance in PY soma and dendrite      | $0.196 \cdot 1e3$           |
| $g_{KM}$             | $I_{KM}$ conductance in PY soma                   | 0.006                       |
| $g_{Na,leak,IN}$     | $I_{Na,leak}$ conductance in IN                   | $2.9 \cdot 10^{-5}$         |
| $g_{K,leak,IN}$      | $I_{K,leak}$ conductance in IN                    | $6 \cdot 10^{-5}$           |
| $g_{Cl,leak,IN}$     | $I_{Cl,leak}$ conductance in IN                   | $1 \cdot 10^{-5}$           |
| $g_{Na,IN}$          | $I_{Na}$ conductance in IN                        | 0.013                       |
| $g_{Kdr,IN}$         | $I_{Kdr}$ conductance in IN                       | 0.027                       |

787

788

789 *Ionic dynamics*

790 The model included six types of ions ( $K^+$ ,  $Na^+$ ,  $Cl^-$ ,  $Ca^{2+}$ ,  $A^-$  and  $HCO_3^-$ ) with variable intra- and  
 791 extracellular concentrations, except for  $HCO_3^-$ , which equilibrium is rapidly attained  
 792 (Theparambil et al., 2020). The evolution of the ion concentrations was based on the following  
 793 equations:

794 
$$\frac{d[K^+]_i}{dt} = J_K^i + J_{K,longitudinal}^i + J_{K,KCC2}^i + J_{K,Pump}^i + J_{K,vol}^i$$

$$795 \quad \frac{d[K^+]_o}{dt} = J_K^o + J_{K,radial} + J_{K,longitudinal}^o + J_{K,bath} + J_{K,KCC2}^o + J_{K,Pump}^o + J_{glia} + J_{K,vol}^o$$

$$796 \quad \frac{d[Na^+]_i}{dt} = J_{Na}^i + J_{Na,longitudinal}^i + J_{Na,Pump}^i + J_{Na,vol}^i$$

$$797 \quad \frac{d[Na^+]_o}{dt} = J_{Na}^o + J_{Na,radial} + J_{Na,longitudinal}^o + J_{Na,bath} + J_{Na,Pump}^o + J_{Na,vol}^o$$

$$798 \quad \frac{d[Cl^-]_i}{dt} = J_{Cl}^i + J_{Cl,GABAA}^i + J_{Cl,longitudinal}^i + J_{Cl,KCC2}^i + J_{Cl,vol}^i$$

$$799 \quad \frac{d[Cl^-]_o}{dt} = J_{Cl}^o + J_{Cl,GABAA}^o + J_{Cl,longitudinal}^o + J_{Cl,bath} + J_{Cl,KCC2}^o + J_{Cl,vol}^o$$

$$800 \quad \frac{d[Ca^{2+}]_{i,tot}}{dt} = J_{Ca}^i + J_{Ca,longitudinal}^i + J_{CaPump}^i + J_{Ca,vol}^i$$

$$801 \quad \frac{d[Ca^+]_o}{dt} = J_{Ca}^o + J_{Ca,longitudinal}^o + J_{CaPump}^o + J_{Ca,vol}^o$$

$$802 \quad \frac{d[A^-]_i}{dt} = J_{A,vol}^i$$

803 where  $[Ca^{2+}]_{i,tot}$  is the total intracellular calcium concentration (see calcium buffer below). All  
804 fluxes (mM/ms) are specified below.

805

### 806 *Membrane currents*

807 The contribution of transmembrane currents to variations in intra- and extracellular ion  
808 concentrations was obtained via the following equations:

$$809 \quad J_X^i = -\frac{\sum I_X S}{zFV_i}$$

$$810 \quad J_X^o = \frac{\sum I_X S}{zFV_o}$$

811 where the sum of  $I_X$  is a net membrane current carrying ion  $X$ ,  $S$  is the surface area of the  
812 compartment,  $z$  is the valence of the ions,  $F$  is the Faraday constant and  $V_i$  and  $V_o$  are the volumes  
813 of the intra- and extracellular compartments.

814

### 815 *Longitudinal diffusion.*

816 Longitudinal diffusion of  $K^+$ ,  $Na^+$ ,  $Ca^{2+}$  and  $Cl^-$  was implemented between the somatic and  
817 dendritic compartments in the intracellular and extracellular space of the same cell. It was  
818 described by Fick's first law:

$$819 \quad J_{X,longitudinal}^{io} = D_x \frac{([X]_{io,a} - [X]_{io})S}{LV_{io}}$$

820 where  $D_x$  is the diffusion coefficient for the ion  $X$ ,  $[X]_{io}$  is the ion concentration in a given intra-  
821 or extracellular compartment,  $[X]_{oi,a}$  is the ion concentration in the adjacent compartment,  $S$  is  
822 the cross-sectional area between the compartments,  $V_{io}$  is the compartment volume,  $L$  is the  
823 distance between the centers of the compartments. The diffusion coefficients were (in  $\text{um}^2/\text{ms}$ ):  
824  $D_{Na} = 1.33$ ,  $D_K = 1.96$ ,  $D_{Ca} = 0.6$ ,  $D_{Cl} = 2.03$  (as in Somjen et al., 2008).

825  
826 *Radial diffusion.*  
827  $\text{Na}^+$  and  $\text{K}^+$  ions diffused radially between adjacent extracellular compartments modeled as  
828 concentric shells around the neurons. The radial exchange of ions between adjacent shells was  
829 described by Fick's first law:

$$830 \quad J_{X,radial} = D_x \frac{\sum ([X]_{o,a} - [X]_o) S}{drV}$$

831 where  $[X]_o$  is the ion concentration in a given shell and the sum goes over all adjacent shells  
832 having concentrations  $[X]_{o,a}$ ,  $V$  is a given shell volume,  $dr$  is the distance between the centers of  
833 the shells and  $S$  is the surface contact area between the shells calculated at 16% of the total outer  
834 shell surface. The electrostatic drift of ions was neglected as the ion movement due to the  
835 electrical potential gradient in the extracellular space was small compared to the diffusion.

836  
837 *Diffusion to/from the bath*  
838 Radial diffusion of  $\text{K}^+$ ,  $\text{Na}^+$  and  $\text{Cl}^-$  between the ECS and the bath was described by Fick's first  
839 law:

$$840 \quad J_{X,bath} = \frac{1}{s} D_x \frac{([X]_{bath} - [X]_o) S}{drV}$$

841 where  $D_x$  is the diffusion coefficient for the ion  $X$ ,  $s$  is the scaling constant,  $S$  is the outer surface  
842 of the shell,  $[X]_{bath}$  is the bath concentration of the ion  $X$ ,  $[X]_o$  is the ion concentration in a given  
843 shell,  $V$  is the shell volume,  $dr$  is the distance between the extracellular space and the bath  
844 (assumed to be half of the shell thickness). Flux  $J_{bath}$  represents various processes such as  
845 diffusion to more distant areas of the brain and cerebrospinal fluid, active transport of potassium  
846 into capillaries and potassium spatial buffering by astrocytes. The effective time constant of these  
847 joint processes is likely to be much slower than that of radial and longitudinal diffusion and is  
848 described by the scaling constant  $s = 4.4 * 10^4$ .

849  
850 *The  $\text{Na}^+/\text{K}^+$  pump*

851 The  $\text{Na}^+/\text{K}^+$  pump was modelled as the sodium and potassium transmembrane currents (Kager  
852 et al., 2000):

$$853 \quad I_{\text{Na,Pump}} = 3I_{\text{max}}\text{flux}([\text{Na}^+]_i, [\text{K}^+]_o)$$

$$854 \quad I_{\text{K,Pump}} = -2I_{\text{max}}\text{flux}([\text{Na}^+]_i, [\text{K}^+]_o)$$

$$855 \quad \text{flux}([\text{Na}^+]_i, [\text{K}^+]_o) = \left(1 + \frac{Km_K}{[\text{K}^+]_o}\right)^{-2} \left(1 + \frac{Km_{\text{Na}}}{[\text{Na}^+]_i}\right)^{-3}$$

856 with  $Km_K = 2$  mM and  $Km_{\text{Na}} = 10$  mM.  $I_{\text{max}}$  values were computed for each cell and compartment  
857 to balance  $\text{Na}^+$  and  $\text{K}^+$  membrane currents at rest and were as follows (in mA/cm<sup>2</sup>): 0.014 (PY  
858 soma), 0.009 (PY dendrite), 0.025 (IN).

859

860 *KCC2 cotransport*

861 The KCC2 cotransporter currents were modelled according to Wei et al. (2014):

$$862 \quad I_{\text{K,KCC2}} = U_{\text{KCC2}} \log\left(\frac{[\text{K}^+]_i[\text{Cl}^-]_i}{[\text{K}^+]_o[\text{Cl}^-]_o}\right)$$

$$863 \quad I_{\text{Cl,KCC2}} = -I_{\text{K,KCC2}}$$

864 with cotransporter strength adjusted to balance chloride leak current at rest,  $U_{\text{KCC2}} = 0.002$   
865 mA/cm<sup>2</sup>.

866

867 *Glial uptake*

868 Potassium uptake by the glia was modelled as a set of differential equations (Kager et al., 2000):

$$869 \quad J_{\text{glia}} = -k_2[\text{K}^+]_o[B] + k_1[\text{KB}]$$

$$870 \quad \frac{d[B]}{dt} = -k_2[\text{K}^+]_o[B] + k_1[\text{KB}]$$

$$871 \quad \frac{d[\text{KB}]}{dt} = k_2[\text{K}^+]_o[B] - k_1[\text{KB}]$$

872 where  $[B]$  is the free buffer,  $[\text{KB}]$  is the bound buffer ( $= [B]_{\text{max}} - [B]$ ),  $B_{\text{max}} = 1100$  mM.  $k_1 =$   
873  $0.0008 \text{ ms}^{-1}$  and  $k_2 = \frac{k_1}{1 + \exp\left(\frac{[\text{K}]_o - 16}{-1.25}\right)}$  are backward and forward rate constants, respectively.

874

875 *The calcium pump and buffer*

876 The calcium pump and buffer which altered the intracellular  $\text{Ca}^{2+}$  were modelled according to  
877 the model implementation of Somjen et al. (2008) in ModelDB, accession number 113446. The  
878 calcium pump which extruded  $\text{Ca}^{2+}$  from the cells was modelled as a  $\text{Ca}^{2+}$  transmembrane  
879 current:

880 
$$I_{CaPump} = \frac{I_{max}}{1 + \frac{K_{pump}}{[Ca^{2+}]_i}}$$

881 with  $I_{max} = 2.55 \text{ mA/cm}^2$  and  $K_{pump} = 0.0069 \text{ mM}$ . Intracellular  $Ca^{2+}$  was buffered by first-order  
 882 chemical  $Ca^{2+}$  buffer with a total concentration of  $[B]_i$  and an equilibrium constant of  $K_d$ .  
 883 Calcium buffering was fast and under the assumption of equilibrium conditions, the relationship  
 884 between the total and free intracellular calcium concentrations,  $[Ca^{2+}]_{i,tot}$  and  $[Ca^{2+}]_i$ , was given  
 885 by (Borgdorff, 2002, pg. 27):

886 
$$[Ca^{2+}]_{i,tot} = [Ca^{2+}]_i \frac{[B]_i + K_d + [Ca^{2+}]_i}{K_d + [Ca^{2+}]_i}$$

887 where  $[B]_i = 1.562 \text{ mM} \cdot (V_i^0/V_i)$ ,  $V_i$  is the intracellular compartment volume,  $V_i^0$  is the  
 888 intracellular compartment volume at rest and  $K_d = 0.008 \text{ mM}$ .

889  
 890 *Volume changes*  
 891 Volume changes were modelled according to Somjen et al. (2008). The rates of intra- and  
 892 extracellular volume changes were proportional to the difference in osmotic pressure between  
 893 the intra- and extracellular compartments and fulfilled the conservation of total volume.

894 
$$\frac{dV_i}{dt} = \Delta$$

895 
$$\frac{dV_o}{dt} = -\Delta$$

896 where

897 
$$\Delta = \frac{c(\pi_i - \pi_o)}{\tau}$$

898 
$$\pi_i = [Na^+]_i + [K^+]_i + [Cl^-]_i + [Ca^{2+}]_i + [HCO_3^-]_i + [A^-]_i$$

899 
$$\pi_o = [Na^+]_o + [K^+]_o + [Cl^-]_o + [Ca^{2+}]_o + [HCO_3^-]_o + [A^-]_o$$

900  $V_i$  and  $V_o$  are the volumes of the intra- and extracellular compartments and  $\tau = 250 \text{ ms}$ . The  
 901 constant  $c$  is introduced for unit conversion and is equal to  $1 \text{ um}^3/\text{mM}$ , hence units of  $\Delta$  are  
 902  $\text{um}^3/\text{ms}$ . The extracellular volume was initially 13.1% of the cellular volume and was allowed to  
 903 shrink maximally down to 4%. Volume changes affected concentrations but not the total mass  
 904 of each ion within a compartment. The conservation of mass required additional fluxes:

905 Intracellular

906 
$$J_{X,vol}^i = -\frac{\Delta}{V_i} [X]_i$$

907 Extracellular

908 
$$J_{X,vol}^o = \frac{\Delta}{V_o} [X]_o$$

909 Extracellular space (ES) volume shrinks maximally by about 27%, comparable to average  
910 reduction of 30% during self-sustained epileptiform discharges (Dietzel et al., 1980).  
911 Intracellular space (IS) volume expands about 4%, being a consequence of constant total volume  
912 (ES+IS = const). Volume changes and resulting shifts in representative ion concentrations are  
913 shown in Appendix I – figure 4. We note that volume changes in our model didn't have big  
914 impact on the observed model dynamics. Shifts in ionic gradients contributed by slow volume  
915 changes were efficiently compensated by other homeostatic mechanisms, which acted on a faster  
916 time scale. In the real tissue astrocyte swelling may be significant and may reduce flow of ions  
917 and oxygen (affecting Na<sup>+</sup>/K<sup>+</sup>-pump activity) contributing to seizures and spreading depression  
918 (Hübel & Ullah, 2016). In our model glial cell swelling was not included and its effects on  
919 diffusion and the Na<sup>+</sup>/K<sup>+</sup>-pump were not simulated which is one of the model limitations.

920  
921 *Initial ion concentrations*  
922 The initial concentrations were based on existing literature: [Na<sup>+</sup>]<sub>i</sub>, [Ca<sup>2+</sup>]<sub>i</sub>, [Na<sup>+</sup>]<sub>o</sub>, [K<sup>+</sup>]<sub>o</sub>, [Ca<sup>2+</sup>]<sub>o</sub>  
923 and [A<sup>-</sup>]<sub>o</sub> (Somjen et al., 2008); [Cl<sup>-</sup>]<sub>i</sub>, [HCO<sub>3</sub><sup>-</sup>]<sub>i</sub>, [HCO<sub>3</sub><sup>-</sup>]<sub>o</sub> (Doyon et al., 2011); [K<sup>+</sup>]<sub>i</sub> [Cl<sup>-</sup>]<sub>o</sub>  
924 (Payne et al., 2003). In setting chloride and potassium concentrations we additionally aimed to  
925 fulfill  $E_K < E_{Cl}$  and  $E_{GABAa} \sim -70$  mV (Andersen et al., 1980). The [A<sup>-</sup>]<sub>i</sub> concentration was set to  
926 fulfill osmotic equilibrium condition. Hence, the initial concentrations were as follows (in mM):  
927 [Na<sup>+</sup>]<sub>i</sub> = 10, [Na<sup>+</sup>]<sub>o</sub> = 140, [K<sup>+</sup>]<sub>i</sub> = 87, [K<sup>+</sup>]<sub>o</sub> = 3.5, [Cl<sup>-</sup>]<sub>o</sub> = 135, [Cl<sup>-</sup>]<sub>i</sub> = 6, [Ca<sup>2+</sup>]<sub>i</sub> = 5e-5, [Ca<sup>2+</sup>]<sub>o</sub>  
928 = 2, [A<sup>-</sup>]<sub>i</sub> = 187.5, [A<sup>-</sup>]<sub>o</sub> = 0, [HCO<sub>3</sub><sup>-</sup>]<sub>i</sub> = 15, [HCO<sub>3</sub><sup>-</sup>]<sub>o</sub> = 25. These values gave the following  
929 Nernst potentials (in mV):  $E_{Na} = 69.4$ ,  $E_K = -84.5$ ,  $E_{Cl} = -81.8$ ,  $E_{Ca} = 139.3$ ,  $E_{HCO3} = -13.4$ ,  $E_{GABAa}$   
930 = -69.5.

931  
932 *Resting state*  
933 Steady-state conditions at rest were characterized by no net flux of the ions at the resting potential  
934 (-61 mV). These conditions were determined separately for each cell and compartment. For  
935 chloride, KCC2 cotransport strength  $U_{KCC2}$  was adjusted to balance Cl<sup>-</sup> leak current at rest, i.e.:

936 
$$I_{Cl,leak} = -I_{Cl,KCC2}$$

937 For sodium and potassium, first, Na<sup>+</sup> leak current conductance  $g_{Na,leak}$  was adjusted to ensure  
938 that at rest all passive and voltage-gated membrane currents  $I_{Na}$  and  $I_K$  are in the ratio -3/2, i.e.,:

939 
$$I_{Na} = -\frac{3}{2}I_K$$



940 Next, the  $\text{Na}^+/\text{K}^+$ -pump strength  $I_{max}$  was adjusted such that  $I_{Na}$  and  $I_K$  currents were balanced by  
941 equal and opposite pump currents:

$$942 \quad -I_{Na} = I_{Na,pump}$$

$$943 \quad -I_K = I_{K,Pump}$$

944

### 945 **Synaptic connections and model inputs**

946 The pyramidal cells created excitatory AMPA synaptic connections with the interneuron and all  
947 other pyramidal cells. The interneuron created an inhibitory GABA<sub>a</sub> synaptic connection with  
948 each pyramidal cell. Excitatory synapses were placed in the middle of the PY dendrite and the  
949 middle of the IN soma. Inhibitory synapses were placed in the middle of the PY soma. The time  
950 course of synaptic conductance was modelled with a built-in NEURON mechanism Exp2Syn,  
951 implementing a dual exponential function:

$$952 \quad g = g_{max} \left[ \exp\left(-\frac{t}{\tau_2}\right) - \exp\left(-\frac{t}{\tau_1}\right) \right]$$

953 where the rise and decay time constants,  $\tau_1$  and  $\tau_2$ , were 2 ms and 6 ms, respectively, for all  
954 synapses.  $g_{max} = \text{weight} * \text{factor}$ , where the factor was defined so that the normalized peak was 1.  
955 The weights for the synapses between the PY and from the PY to the IN were  $w_{ee} = 0.0002 \mu\text{S}$   
956 and  $w_{ei} = 0.0017 \mu\text{S}$ , respectively. The inhibitory synaptic weight,  $w_{ie}$ , was  $0.0005 \mu\text{S}$ . All  
957 pyramidal cells received background input modelled as a Poisson spike train, which was different  
958 in each cell, activated an excitatory synapse at a rate of 5 Hz and had a synaptic weight  $w_{input} =$   
959  $0.0004 \mu\text{S}$ . To initiate the SLE, a depolarizing ramp current,  $I_{inj}$ , was injected into the  
960 interneuron, with the initial amplitude of 0.35 nA linearly decreasing toward 0 over 40 seconds.  
961 The inhibitory GABA<sub>a</sub> postsynaptic currents were carried by  $\text{Cl}^-$  and  $\text{HCO}_3^-$  ions (Jedlicka et  
962 al., 2010):

$$963 \quad I_{GABAa} = I_{Cl GABAa} + I_{HCO3 GABAa}$$

$$964 \quad I_{Cl GABAa} = (1 - P)g(V - E_{Cl})$$

$$965 \quad I_{HCO3 GABAa} = Pg(V - E_{HCO3})$$

$$966 \quad E_{GABAa} = (1 - P)E_{Cl} + PE_{HCO3}$$

967 where relative permeability  $P$  was 0.18.

968

### 969 **Calculation of the LFP**

970 The local field potentials were calculated based on all transmembrane currents in all cells using  
971 the following equation (Nunez & Srinivasan, 2006):

972 
$$\phi(r, t) = \frac{1}{4\pi\sigma} \sum_{n=1}^N \frac{I_n(t)}{|r - r_n|}$$

973 Where  $I_n$  is a point current source at position  $r_n$  (taken as the position of a mid-point of a  
974 compartment) and  $r$  is the position of the electrode.  $\sigma = 0.3$  S/m is the extracellular conductivity  
975 (Lindén et al., 2014). The electrode was located in the middle of the somatic layer of the PY and  
976 IN cells, approximately 16  $\mu$ m from the centers of the somas of two neighbouring PY cells. The  
977 currents from the interneuron were taken with a weight of 0.2 to decrease their contribution.  
978 Also, the influence of the injected current on the LFP was removed. The amplitude of the  
979 simulated LFP signal was an order of magnitude smaller than the experimental data. This was  
980 due to current point-source approximation and the small number of cells in the modeled network.

981

### 982 **Inter-burst interval fitting**

983 Inter-burst intervals were fitted in Matlab with linear, exponential, logarithmic and square root  
984 relationships. The linear function,  $IBI(t) = A + Bt$ , was fitted using the *polyfit* procedure. The  
985 exponential function,  $IBI(t) = A + B\exp(Ct)$ , was fitted using the *fminsearch* procedure. The  
986 logarithmic and square root fits were based on the bifurcation theory, which suggests that close  
987 to bifurcation, the oscillation frequency may be constant or decay as square root or inverse of a  
988 logarithm of the distance to the bifurcation (Izhikevich, 2000). Accordingly, we fitted IBI (i.e.,  
989 inverse of frequency) with logarithmic and inverse square root functions  $IBI(\lambda) = A + B\log(\lambda)$ ,  
990 where  $\log()$  denotes the natural logarithm function, and  $IBI(\lambda) = A + B/\text{sqrt}(\lambda)$ , where  $\text{sqrt}()$   
991 denotes the square root function. Both functions were fitted using the *polyfit* procedure with  
992  $\log(\lambda)$  and  $1/\text{sqrt}(\lambda)$  treated as a predictor variable. The distance to the bifurcation point was  
993 computed as  $\lambda = t_{end} - t + I$ , where  $t_{end}$  denotes bifurcation point, i.e., time of an SLE end while  
994  $t$  is time since the beginning of an SLE. One second offset in  $\lambda$  was necessary to avoid infinity  
995 in the predictor variables when  $t = t_{end}$ . The goodness of fit was evaluated by Root Mean Square  
996 Error (RMSE).

997

### 998 **Software Accessibility**

999 If accepted, the model will be publicly available in the ModelDB

1000 (<https://senselab.med.yale.edu/modeldb/>)

## 1001 **Acknowledgements**

1002 We are grateful to Laura Uva and Laura Librizzi for helpful discussions throughout the  
1003 preparation of this work and for providing the SLE data from the *in vitro* isolated whole guinea  
1004 pig brain. We thank Laura Tassi from the *Claudio Munari* Epilepsy Surgery Center of the  
1005 Niguarda Hospital in Milano, Italy, for providing the intracerebral data on human seizures. The  
1006 work of MdC and VG was supported by the EPICARE grant of the Associazione Paolo Zorzi  
1007 for the Neuroscience.

## 1008 **Competing interests**

1009 The authors report no competing interests.

## 1010 **References**

1011 Alfonsa, H., Merricks, E. M., Codadu, N. K., Cunningham, M. O., Deisseroth, K., Racca, C., &  
1012 Trevelyan, A. J. (2015). The Contribution of Raised Intra-neuronal Chloride to Epileptic  
1013 Network Activity. *Journal of Neuroscience*, *35*(20), 7715–7726.  
1014 <https://doi.org/10.1523/JNEUROSCI.4105-14.2015>

1015 Andersen, P., Dingledine, R., Gjerstad, L., Langmoen, I. A., & Laursen, A. M. (1980). Two  
1016 different responses of hippocampal pyramidal cells to application of gamma-amino  
1017 butyric acid. *The Journal of Physiology*, *305*(1), 279–296.  
1018 <https://doi.org/10.1113/jphysiol.1980.sp013363>

1019 Aracri, P., de Curtis, M., Forcaia, G., & Uva, L. (2018). Enhanced thalamo-hippocampal  
1020 synchronization during focal limbic seizures. *Epilepsia*, *59*(9), 1774–1784.  
1021 <https://doi.org/10.1111/epi.14521>

1022 Avoli, M., Barbarosie, M., Lücke, A., Nagao, T., Lopantsev, V., & Köhling, R. (1996).  
1023 Synchronous GABA-Mediated Potentials and Epileptiform Discharges in the Rat Limbic  
1024 System In Vitro. *The Journal of Neuroscience*, *16*(12), 3912–3924.  
1025 <https://doi.org/10.1523/JNEUROSCI.16-12-03912.1996>

1026 Avoli, M., De Curtis, M., Gnatkovsky, V., Gotman, J., Köhling, R., Lévesque, M., Manseau,  
1027 F., Shiri, Z., & Williams, S. (2016). Specific imbalance of excitatory/inhibitory signaling  
1028 establishes seizure onset pattern in temporal lobe epilepsy. *Journal of Neurophysiology*,

- 1029           115(6), 3229–3237. <https://doi.org/10.1152/jn.01128.2015>
- 1030   Bauer, P. R., Thijs, R. D., Lamberts, R. J., Velis, D. N., Visser, G. H., Tolner, E. A., Sander, J.  
1031       W., Lopes da Silva, F. H., & Kalitzin, S. N. (2017). Dynamics of convulsive seizure  
1032       termination and postictal generalized EEG suppression. *Brain*, 140(3), 655–668.  
1033       <https://doi.org/10.1093/brain/aww322>
- 1034   Bazhenov, M., Timofeev, I., Steriade, M., & Sejnowski, T. J. (2004). Potassium model for  
1035       slow (2-3 Hz) in vivo neocortical paroxysmal oscillations. *Journal of Neurophysiology*,  
1036       92(2), 1116–1132. <https://doi.org/10.1152/jn.00529.2003>
- 1037   Blauwblomme, T., Jiruska, P., & Huberfeld, G. (2014). Mechanisms of ictogenesis. In  
1038       *International Review of Neurobiology* (Vol. 114, pp. 155–185). Academic Press Inc.  
1039       <https://doi.org/10.1016/B978-0-12-418693-4.00007-8>
- 1040   Boido, D., Gnatkovsky, V., Uva, L., Francione, S., & De Curtis, M. (2014). Simultaneous  
1041       enhancement of excitation and postburst inhibition at the end of focal seizures. *Annals of*  
1042       *Neurology*, 76(6), 826–836. <https://doi.org/10.1002/ana.24193>
- 1043   Borgdorff, J. A. (2002). *Calcium dynamics in hippocampal neurones* [University of  
1044       Amsterdam]. <https://hdl.handle.net/11245/1.201021>
- 1045   Bradford, H. F. (1995). Glutamate, GABA and epilepsy. *Progress in Neurobiology*, 47(6),  
1046       477–511. [https://doi.org/10.1016/0301-0082\(95\)00030-5](https://doi.org/10.1016/0301-0082(95)00030-5)
- 1047   Bragin, A., Azizyan, A., Almajano, J., & Engel, J. (2009). The Cause of the Imbalance in the  
1048       Neuronal Network Leading to Seizure Activity Can Be Predicted by the Electrographic  
1049       Pattern of the Seizure Onset. *Journal of Neuroscience*, 29(11), 3660–3671.  
1050       <https://doi.org/10.1523/JNEUROSCI.5309-08.2009>
- 1051   Bragin, Anatol, Penttonen, M., & Buzsáki, G. (1997). Termination of Epileptic Afterdischarge  
1052       in the Hippocampus. *The Journal of Neuroscience*, 17(7), 2567–2579.  
1053       <https://doi.org/10.1523/JNEUROSCI.17-07-02567.1997>
- 1054   Bromfield, E. B., Cavazos, J. E., & Sirven, J. I. (Eds.). (2006). *An Introduction to Epilepsy*  
1055       [Internet]. West Hartford (CT): American Epilepsy Society.

- 1056 <https://www.ncbi.nlm.nih.gov/books/NBK2508/>
- 1057 Buchin, A., Chizhov, A., Huberfeld, G., Miles, R., & Gutkin, B. S. (2016). Reduced efficacy of  
1058 the KCC2 cotransporter promotes epileptic oscillations in a subiculum network model.  
1059 *Journal of Neuroscience*, *36*(46), 11619–11633.  
1060 <https://doi.org/10.1523/JNEUROSCI.4228-15.2016>
- 1061 Cherubini, E., Gaiarsa, J. L., & Ben-Ari, Y. (1991). GABA: an excitatory transmitter in early  
1062 postnatal life. *Trends in Neurosciences*, *14*(12), 515–519. [https://doi.org/10.1016/0166-](https://doi.org/10.1016/0166-2236(91)90003-D)  
1063 [2236\(91\)90003-D](https://doi.org/10.1016/0166-2236(91)90003-D)
- 1064 Chizhov, A. V., Zefirov, A. V., Amakhin, D. V., Smirnova, E. Y., & Zaitsev, A. V. (2018).  
1065 Minimal model of interictal and ictal discharges “Epileptor-2.” *PLoS Computational*  
1066 *Biology*, *14*(5), 1–25. <https://doi.org/10.1371/journal.pcbi.1006186>
- 1067 Codadu, N. K., Graham, R. T., Burman, R. J., Jackson-Taylor, R. T., Raimondo, J. V.,  
1068 Trevelyan, A. J., & Parrish, R. R. (2019). Divergent paths to seizure-like events.  
1069 *Physiological Reports*, *7*(19). <https://doi.org/10.14814/phy2.14226>
- 1070 Conradsen, I., Moldovan, M., Jennum, P., Wolf, P., Farina, D., & Beniczky, S. (2013).  
1071 Dynamics of muscle activation during tonic–clonic seizures. *Epilepsy Research*, *104*(1–  
1072 2), 84–93. <https://doi.org/10.1016/j.eplepsyres.2012.09.004>
- 1073 Cossart, R., Bernard, C., & Ben-Ari, Y. (2005). Multiple facets of GABAergic neurons and  
1074 synapses: multiple fates of GABA signalling in epilepsies. *Trends in Neurosciences*,  
1075 *28*(2), 108–115. <https://doi.org/10.1016/j.tins.2004.11.011>
- 1076 de Curtis, M., & Avoli, M. (2016). GABAergic networks jump-start focal seizures. *Epilepsia*,  
1077 *57*(5), 679–687. <https://doi.org/10.1111/epi.13370>
- 1078 de Curtis, M., & Gnatkovsky, V. (2009). Reevaluating the mechanisms of focal ictogenesis:  
1079 The role of low-voltage fast activity. *Epilepsia*, *50*(12), 2514–2525.  
1080 <https://doi.org/10.1111/j.1528-1167.2009.02249.x>
- 1081 de Curtis, M., Librizzi, L., & Uva, L. (2006). In Vitro Isolated Guinea Pig Brain. In A.  
1082 Pitkänen, P. A. Schwartzkroin, & S. L. Moshé (Eds.), *Models of Seizures and Epilepsy*

- 1083 (pp. 103–109). Academic Press Inc. <https://doi.org/10.1016/B978-012088554-1/50011-6>
- 1084 de Curtis, M., Uva, L., Gnatkovsky, V., & Librizzi, L. (2018). Potassium dynamics and  
1085 seizures: Why is potassium ictogenic? *Epilepsy Research*, *143*(April), 50–59.  
1086 <https://doi.org/10.1016/j.eplepsyres.2018.04.005>
- 1087 Derchansky, M., Jahromi, S. S., Mamani, M., Shin, D. S., Sik, A., & Carlen, P. L. (2008).  
1088 Transition to seizures in the isolated immature mouse hippocampus: a switch from  
1089 dominant phasic inhibition to dominant phasic excitation. *The Journal of Physiology*,  
1090 *586*(2), 477–494. <https://doi.org/10.1113/jphysiol.2007.143065>
- 1091 Devinsky, O., Vezzani, A., O'Brien, T. J., Jette, N., Scheffer, I. E., de Curtis, M., & Perucca, P.  
1092 (2018). Epilepsy. *Nature Reviews Disease Primers*, *4*(1), 18024.  
1093 <https://doi.org/10.1038/nrdp.2018.24>
- 1094 Dietzel, I., Heinemann, U., Hofmeier, G., & Lux, H. D. (1980). Transient changes in the size of  
1095 the extracellular space in the sensorimotor cortex of cats in relation to stimulus-induced  
1096 changes in potassium concentration. *Experimental Brain Research*, *40*(4).  
1097 <https://doi.org/10.1007/BF00236151>
- 1098 Dietzel, I., Heinemann, U., Hofmeier, G., & Lux, H. D. (1982). Stimulus-induced changes in  
1099 extracellular Na<sup>+</sup> and Cl<sup>-</sup> concentration in relation to changes in the size of the  
1100 extracellular space. *Experimental Brain Research*, *46*(1), 73–84.  
1101 <https://doi.org/10.1007/BF00238100>
- 1102 Doyon, N., Prescott, S. A., Castonguay, A., Godin, A. G., Kröger, H., & De Koninck, Y.  
1103 (2011). Efficacy of Synaptic Inhibition Depends on Multiple, Dynamically Interacting  
1104 Mechanisms Implicated in Chloride Homeostasis. *PLoS Computational Biology*, *7*(9),  
1105 e1002149. <https://doi.org/10.1371/journal.pcbi.1002149>
- 1106 During, M. J., & Spencer, D. D. (1992). Adenosine: A potential mediator of seizure arrest and  
1107 postictal refractoriness. *Annals of Neurology*, *32*(5), 618–624.  
1108 <https://doi.org/10.1002/ana.410320504>
- 1109 Ebert, U., Cramer, S., & Löscher, W. (1997). Phenytoin's effect on the spread of seizure  
1110 activity in the amygdala kindling model. *Naunyn-Schmiedeberg's Archives of*

- 1111 *Pharmacology*, 356(3), 341–347. <https://doi.org/10.1007/PL00005060>
- 1112 Elahian, B., Lado, N. E., Mankin, E., Vangala, S., Misra, A., Moxon, K., Fried, I., Sharan, A.,  
1113 Yeasin, M., Staba, R., Bragin, A., Avoli, M., Sperling, M. R., Engel, J., & Weiss, S. A.  
1114 (2018). Low-voltage fast seizures in humans begin with increased interneuron firing.  
1115 *Annals of Neurology*, 84(4), 588–600. <https://doi.org/10.1002/ana.25325>
- 1116 Ellender, T. J., Raimondo, J. V., Irkle, A., Lamsa, K. P., & Akerman, C. J. (2014). Excitatory  
1117 effects of parvalbumin-expressing interneurons maintain hippocampal epileptiform  
1118 activity via synchronous afterdischarges. *Journal of Neuroscience*, 34(46), 15208–15222.  
1119 <https://doi.org/10.1523/JNEUROSCI.1747-14.2014>
- 1120 Evangelista, E., Bénar, C., Bonini, F., Carron, R., Colombet, B., Régis, J., & Bartolomei, F.  
1121 (2015). Does the Thalamo-Cortical Synchrony Play a Role in Seizure Termination?  
1122 *Frontiers in Neurology*, 6. <https://doi.org/10.3389/fneur.2015.00192>
- 1123 Feng, Z., & Durand, D. M. (2003). Low-Calcium Epileptiform Activity in the Hippocampus In  
1124 Vivo. *Journal of Neurophysiology*, 90(4), 2253–2260.  
1125 <https://doi.org/10.1152/jn.00241.2003>
- 1126 Fisher, R. S., Pedley, T. A., Moody, W. J., & Prince, D. A. (1976). The Role of Extracellular  
1127 Potassium in Hippocampal Epilepsy. *Archives of Neurology*, 33(2), 76–83.  
1128 <https://doi.org/10.1001/archneur.1976.00500020004002>
- 1129 Fisher, Robert S., & Schachter, S. C. (2000). The Postictal State: A Neglected Entity in the  
1130 Management of Epilepsy. *Epilepsy and Behavior*, 1(1), 52–59.  
1131 <https://doi.org/10.1006/ebch.2000.0023>
- 1132 Franaszczuk, P. J., Bergey, G. K., Durka, P. J., & Eisenberg, H. M. (1998). Time-frequency  
1133 analysis using the matching pursuit algorithm applied to seizures originating from the  
1134 mesial temporal lobe. *Electroencephalography and Clinical Neurophysiology*, 106(6),  
1135 513–521. [https://doi.org/10.1016/S0013-4694\(98\)00024-8](https://doi.org/10.1016/S0013-4694(98)00024-8)
- 1136 Fransen, E., Alonso, A. A., & Hasselmo, M. E. (2002). Simulations of the role of the  
1137 muscarinic-activated calcium-sensitive nonspecific cation current INCM in entorhinal  
1138 neuronal activity during delayed matching tasks. *Journal of Neuroscience*, 22(3), 1081–



- 1139 1097. <https://doi.org/10.1523/jneurosci.22-03-01081.2002>
- 1140 Fröhlich, F., Bazhenov, M., Timofeev, I., Steriade, M., & Sejnowski, T. J. (2006). Slow state  
1141 transitions of sustained neural oscillations by activity-dependent modulation of intrinsic  
1142 excitability. *Journal of Neuroscience*, *26*(23), 6153–6162.  
1143 <https://doi.org/10.1523/JNEUROSCI.5509-05.2006>
- 1144 Fujiwara-Tsukamoto, Y., Isomura, Y., Imanishi, M., Fukai, T., & Takada, M. (2007). Distinct  
1145 types of ionic modulation of GABA actions in pyramidal cells and interneurons during  
1146 electrical induction of hippocampal seizure-like network activity. *European Journal of*  
1147 *Neuroscience*, *25*(9), 2713–2725. <https://doi.org/10.1111/j.1460-9568.2007.05543.x>
- 1148 Futamachi, K. J., Mutani, R., & Prince, D. A. (1974). Potassium activity in rabbit cortex. *Brain*  
1149 *Research*, *75*(1), 5–25. [https://doi.org/10.1016/0006-8993\(74\)90767-7](https://doi.org/10.1016/0006-8993(74)90767-7)
- 1150 Gentiletti, D., Suffczynski, P., Gnatkovsky, V., & De Curtis, M. (2017). Changes of Ionic  
1151 Concentrations during Seizure Transitions-A Modeling Study. *International Journal of*  
1152 *Neural Systems*, *27*(4), 1–16. <https://doi.org/10.1142/S0129065717500046>
- 1153 Gnatkovsky, V., Librizzi, L., Trombin, F., & De Curtis, M. (2008). Fast activity at seizure  
1154 onset is mediated by inhibitory circuits in the entorhinal cortex in vitro. *Annals of*  
1155 *Neurology*, *64*(6), 674–686. <https://doi.org/10.1002/ana.21519>
- 1156 Golomb, D., Yue, C., & Yaari, Y. (2006). Contribution of Persistent Na<sup>+</sup> Current and M-Type  
1157 K<sup>+</sup> Current to Somatic Bursting in CA1 Pyramidal Cells: Combined Experimental and  
1158 Modeling Study. *Journal of Neurophysiology*, *96*(4), 1912–1926.  
1159 <https://doi.org/10.1152/jn.00205.2006>
- 1160 González, O. C., Shiri, Z., Krishnan, G. P., Myers, T. L., Williams, S., Avoli, M., & Bazhenov,  
1161 M. (2018). Role of KCC2-dependent potassium efflux in 4-Aminopyridine-induced  
1162 Epileptiform synchronization. *Neurobiology of Disease*, *109*(August 2017), 137–147.  
1163 <https://doi.org/10.1016/j.nbd.2017.10.011>
- 1164 Grasse, D. W., Karunakaran, S., & Moxon, K. A. (2013). Neuronal synchrony and the  
1165 transition to spontaneous seizures. *Experimental Neurology*, *248*, 72–84.  
1166 <https://doi.org/10.1016/j.expneurol.2013.05.004>

- 1167 Grigorovsky, V., Jacobs, D., Breton, V. L., Tufa, U., Lucasius, C., del Campo, J. M.,  
1168 Chinvarun, Y., Carlen, P. L., Wennberg, R., & Bardakjian, B. L. (2020). Delta-gamma  
1169 phase-amplitude coupling as a biomarker of postictal generalized EEG suppression. *Brain*  
1170 *Communications*, 2(2). <https://doi.org/10.1093/braincomms/fcaa182>
- 1171 Haas, H. L., & Jefferys, J. G. (1984). Low-calcium field burst discharges of CA1 pyramidal  
1172 neurones in rat hippocampal slices. *The Journal of Physiology*, 354(1), 185–201.  
1173 <https://doi.org/10.1113/jphysiol.1984.sp015371>
- 1174 Hamidi, S., & Avoli, M. (2015). KCC2 function modulates in vitro ictogenesis. *Neurobiology*  
1175 *of Disease*, 79, 51–58. <https://doi.org/10.1016/j.nbd.2015.04.006>
- 1176 Heinemann, U., Lux, H. D., & Gutnick, M. J. (1977). Extracellular free calcium and potassium  
1177 during paroxysmal activity in the cerebral cortex of the cat. *Experimental Brain Research*,  
1178 27(3–4), 237–243. <https://doi.org/10.1007/BF00235500>
- 1179 Heinemann, Uwe, & Lux, H. D. (1975). Undershoots following stimulus-induced rises of  
1180 extracellular potassium concentration in cerebral cortex of cat. *Brain Research*, 93(1), 63–  
1181 76. [https://doi.org/10.1016/0006-8993\(75\)90286-3](https://doi.org/10.1016/0006-8993(75)90286-3)
- 1182 Ho, Y. E. C., & Truccolo, W. (2016). Interaction between synaptic inhibition and glial-  
1183 potassium dynamics leads to diverse seizure transition modes in biophysical models of  
1184 human focal seizures. *Journal of Computational Neuroscience*, 41(2), 225–244.  
1185 <https://doi.org/10.1007/s10827-016-0615-7>
- 1186 Hübel, N., & Ullah, G. (2016). Anions Govern Cell Volume: A Case Study of Relative  
1187 Astrocytic and Neuronal Swelling in Spreading Depolarization. *PLOS ONE*, 11(3),  
1188 e0147060. <https://doi.org/10.1371/journal.pone.0147060>
- 1189 Igelström, K. M. (2013). Is Slack an Intrinsic Seizure Terminator? *The Neuroscientist*, 19(3),  
1190 248–254. <https://doi.org/10.1177/1073858412446311>
- 1191 IZHIKEVICH, E. M. (2000). NEURAL EXCITABILITY, SPIKING AND BURSTING.  
1192 *International Journal of Bifurcation and Chaos*, 10(06), 1171–1266.  
1193 <https://doi.org/10.1142/S0218127400000840>

- 1194 Jedlicka, P., Deller, T., Gutkin, B. S., & Backus, K. H. (2010). Activity-dependent intracellular  
1195 chloride accumulation and diffusion controls GABAA receptor-mediated synaptic  
1196 transmission. *Hippocampus*, n/a-n/a. <https://doi.org/10.1002/hipo.20804>
- 1197 Jefferys, J. G. (1995). Nonsynaptic modulation of neuronal activity in the brain: electric  
1198 currents and extracellular ions. *Physiological Reviews*, 75(4), 689–723.  
1199 <https://doi.org/10.1152/physrev.1995.75.4.689>
- 1200 Jefferys, J. G. R., & Haas, H. L. (1982). Synchronized bursting of CA1 hippocampal pyramidal  
1201 cells in the absence of synaptic transmission. *Nature*, 300(5891), 448–450.  
1202 <https://doi.org/10.1038/300448a0>
- 1203 Jefferys, J., Jiruska, P., de Curtis, M., & Avoli, M. (2012). Limbic Network Synchronization  
1204 and Temporal Lobe Epilepsy. In J. Noebels, M. Avoli, M. Rogawski, R. Olsen, & A.  
1205 Delgado-Escueta (Eds.), *Jasper's Basic Mechanisms of the Epilepsies*. Bethesda (MD):  
1206 National Center for Biotechnology Information (US).  
1207 <http://www.ncbi.nlm.nih.gov/pubmed/22787650>
- 1208 Jensen, M. S., & Yaari, Y. (1997). Role of intrinsic burst firing, potassium accumulation, and  
1209 electrical coupling in the elevated potassium model of hippocampal epilepsy. *Journal of*  
1210 *Neurophysiology*, 77(3), 1224–1233. <https://doi.org/10.1152/jn.1997.77.3.1224>
- 1211 Jirsa, V. K., Stacey, W. C., Quilichini, P. P., Ivanov, A. I., & Bernard, C. (2014). On the nature  
1212 of seizure dynamics. *Brain*, 137(8), 2210–2230. <https://doi.org/10.1093/brain/awu133>
- 1213 Kager, H., Wadman, W. J., & Somjen, G. G. (2000). Simulated Seizures and Spreading  
1214 Depression in a Neuron Model Incorporating Interstitial Space and Ion Concentrations.  
1215 *Journal of Neurophysiology*, 84(1), 495–512. <https://doi.org/10.1152/jn.2000.84.1.495>
- 1216 Kager, H., Wadman, W. J., & Somjen, G. G. (2002). Conditions for the triggering of spreading  
1217 depression studied with computer simulations. *Journal of Neurophysiology*, 88(5), 2700–  
1218 2712. <https://doi.org/10.1152/jn.00237.2002>
- 1219 Kaila, K., Lamsa, K., Smirnov, S., Taira, T., & Voipio, J. (1997). Long-lasting GABA-  
1220 mediated depolarization evoked by high-frequency stimulation in pyramidal neurons of  
1221 rat hippocampal slice is attributable to a network-driven, bicarbonate-dependent K<sup>+</sup>

- 1222 transient. *Journal of Neuroscience*, 17(20), 7662–7672.  
1223 <https://doi.org/10.1523/jneurosci.17-20-07662.1997>
- 1224 Kaila, K., Price, T. J., Payne, J. A., Puskarjov, M., & Voipio, J. (2014). Cation-chloride  
1225 cotransporters in neuronal development, plasticity and disease. *Nature Reviews*  
1226 *Neuroscience*, 15(10), 637–654. <https://doi.org/10.1038/nrn3819>
- 1227 Kalitzin, S. N., Bauer, P. R., Lamberts, R. J., Velis, D. N., Thijs, R. D., & Da Silva, F. H. L.  
1228 (2016). Automated Video Detection of Epileptic Convulsion Slowing as a Precursor for  
1229 Post-Seizure Neuronal Collapse. *International Journal of Neural Systems*, 26(8), 100–  
1230 104. <https://doi.org/10.1142/S0129065716500271>
- 1231 Krishnan, G. P., & Bazhenov, M. (2011). Ionic dynamics mediate spontaneous termination of  
1232 seizures and postictal depression state. *Journal of Neuroscience*, 31(24), 8870–8882.  
1233 <https://doi.org/10.1523/JNEUROSCI.6200-10.2011>
- 1234 Krishnan, G. P., Filatov, G., Shilnikov, A., & Bazhenov, M. (2015). Electrogenic properties of  
1235 the Na<sup>+</sup>/K<sup>+</sup> ATPase control transitions between normal and pathological brain states.  
1236 *Journal of Neurophysiology*, 113(9), 3356–3374. <https://doi.org/10.1152/jn.00460.2014>
- 1237 Lado, F. A., & Moshé, S. L. (2008). How do seizures stop? *Epilepsia*, 49(10), 1651–1664.  
1238 <https://doi.org/10.1111/j.1528-1167.2008.01669.x>
- 1239 Lagarde, S., Buzori, S., Trebuchon, A., Carron, R., Scavarda, D., Milh, M., McGonigal, A., &  
1240 Bartolomei, F. (2019). The repertoire of seizure onset patterns in human focal epilepsies:  
1241 Determinants and prognostic values. *Epilepsia*, 60(1), 85–95.  
1242 <https://doi.org/10.1111/epi.14604>
- 1243 Lévesque, M., Herrington, R., Hamidi, S., & Avoli, M. (2016). Interneurons spark seizure-like  
1244 activity in the entorhinal cortex. *Neurobiology of Disease*, 87, 91–101.  
1245 <https://doi.org/10.1016/j.nbd.2015.12.011>
- 1246 Lian, J., Bikson, M., Shuai, J., & Durand, D. M. (2001). Propagation of non-synaptic  
1247 epileptiform activity across a lesion in rat hippocampal slices. *Journal of Physiology*,  
1248 537(1), 191–199. <https://doi.org/10.1111/j.1469-7793.2001.0191k.x>

- 1249 Lillis, K. P., Kramer, M. A., Mertz, J., Staley, K. J., & White, J. A. (2012). Pyramidal cells  
1250 accumulate chloride at seizure onset. *Neurobiology of Disease*, *47*(3), 358–366.  
1251 <https://doi.org/10.1016/j.nbd.2012.05.016>
- 1252 Lindén, H., Hagen, E., Leski, S., Norheim, E. S., Pettersen, K. H., & Einevoll, G. T. (2014).  
1253 LFPy: A tool for biophysical simulation of extracellular potentials generated by detailed  
1254 model neurons. *Frontiers in Neuroinformatics*, *7*(JAN), 1–15.  
1255 <https://doi.org/10.3389/fninf.2013.00041>
- 1256 Liou, J., Smith, E. H., Bateman, L. M., Bruce, S. L., McKhann, G. M., Goodman, R. R.,  
1257 Emerson, R. G., Schevon, C. A., & Abbott, L. (2020). A model for focal seizure onset,  
1258 propagation, evolution, and progression. *ELife*, *9*. <https://doi.org/10.7554/eLife.50927>
- 1259 Lopantsev, V., & Avoli, M. (1998). Participation of GABA(A)-mediated inhibition in ictal-like  
1260 discharges in the rat entorhinal cortex. *Journal of Neurophysiology*, *79*(1), 352–360.  
1261 <https://doi.org/10.1152/jn.1998.79.1.352>
- 1262 Magistretti, J., & Alonso, A. (1999). Biophysical Properties and Slow Voltage-Dependent  
1263 Inactivation of a Sustained Sodium Current in Entorhinal Cortex Layer-II Principal  
1264 Neurons. *Journal of General Physiology*, *114*(4), 491–509.  
1265 <https://doi.org/10.1085/jgp.114.4.491>
- 1266 Magloire, V., Cornford, J., Lieb, A., Kullmann, D. M., & Pavlov, I. (2019). KCC2  
1267 overexpression prevents the paradoxical seizure-promoting action of somatic inhibition.  
1268 *Nature Communications*, *10*(1), 1–13. <https://doi.org/10.1038/s41467-019-08933-4>
- 1269 Magloire, V., Mercier, M. S., Kullmann, D. M., & Pavlov, I. (2019). GABAergic Interneurons  
1270 in Seizures: Investigating Causality With Optogenetics. *The Neuroscientist*, *25*(4), 344–  
1271 358. <https://doi.org/10.1177/1073858418805002>
- 1272 Martinet, L.-E., Fiddymont, G., Madsen, J. R., Eskandar, E. N., Truccolo, W., Eden, U. T.,  
1273 Cash, S. S., & Kramer, M. A. (2017). Human seizures couple across spatial scales through  
1274 travelling wave dynamics. *Nature Communications*, *8*(1), 14896.  
1275 <https://doi.org/10.1038/ncomms14896>
- 1276 McBain, C., Traynelis, S., & Dingledine, R. (1990). Regional variation of extracellular space

- 1277 in the hippocampus. *Science*, 249(4969), 674–677.  
1278 <https://doi.org/10.1126/science.2382142>
- 1279 Miles, R., Blaesse, P., Huberfeld, G., Wittner, L., & Kaila, K. (2012). Chloride homeostasis  
1280 and GABA signaling in temporal lobe epilepsy. In D.-E. A. Noebels JL, Avoli M,  
1281 Rogawski MA, Olsen RW (Ed.), *Jasper's Basic Mechanisms of the Epilepsies*. National  
1282 Center for Biotechnology Information (US).  
1283 <http://www.ncbi.nlm.nih.gov/pubmed/22787654>
- 1284 Miri, M. L., Vinck, M., Pant, R., & Cardin, J. A. (2018). Altered hippocampal interneuron  
1285 activity precedes ictal onset. *ELife*, 7. <https://doi.org/10.7554/eLife.40750>
- 1286 Moore, Y. E., Deeb, T. Z., Chadchankar, H., Brandon, N. J., & Moss, S. J. (2018). Potentiating  
1287 KCC2 activity is sufficient to limit the onset and severity of seizures. *Proceedings of the*  
1288 *National Academy of Sciences of the United States of America*, 115(40), 10166–10171.  
1289 <https://doi.org/10.1073/pnas.1810134115>
- 1290 Nunez, P. L., & Srinivasan, R. (2006). *Electric Fields of the Brain*. Oxford University Press.  
1291 <https://doi.org/10.1093/acprof:oso/9780195050387.001.0001>
- 1292 Payne, D. E., Karoly, P. J., Freestone, D. R., Boston, R., D'Souza, W., Nurse, E., Kuhlmann,  
1293 L., Cook, M. J., & Grayden, D. B. (2018). Postictal suppression and seizure durations: A  
1294 patient-specific, long-term iEEG analysis. *Epilepsia*, 59(5), 1027–1036.  
1295 <https://doi.org/10.1111/epi.14065>
- 1296 Payne, J. A. (1997). Functional characterization of the neuronal-specific K-Cl cotransporter:  
1297 Implications for [K<sup>+</sup>]<sub>o</sub> regulation. *American Journal of Physiology - Cell Physiology*,  
1298 273(5 42-5). <https://doi.org/10.1152/ajpcell.1997.273.5.c1516>
- 1299 Payne, J. A., Rivera, C., Voipio, J., & Kaila, K. (2003). Cation-chloride co-transporters in  
1300 neuronal communication, development and trauma. *Trends in Neurosciences*, 26(4), 199–  
1301 206. [https://doi.org/10.1016/S0166-2236\(03\)00068-7](https://doi.org/10.1016/S0166-2236(03)00068-7)
- 1302 Perucca, P., Dubeau, F., & Gotman, J. (2014). Intracranial electroencephalographic seizure-  
1303 onset patterns: effect of underlying pathology. *Brain*, 137(1), 183–196.  
1304 <https://doi.org/10.1093/brain/awt299>



- 1305 Pottkämper, J. C. M., Hofmeijer, J., van Waarde, J. A., & van Putten, M. J. A. M. (2020). The  
1306 postictal state — What do we know? *Epilepsia*, *61*(6), 1045–1061.  
1307 <https://doi.org/10.1111/epi.16519>
- 1308 Proix, T., Jirsa, V. K., Bartolomei, F., Guye, M., & Truccolo, W. (2018). Predicting the  
1309 spatiotemporal diversity of seizure propagation and termination in human focal epilepsy.  
1310 *Nature Communications*, *9*(1), 1088. <https://doi.org/10.1038/s41467-018-02973-y>
- 1311 Pumain, R., Menini, C., Heinemann, U., Louvel, J., & Silva-Barrat, C. (1985). Chemical  
1312 synaptic transmission is not necessary for epileptic seizures to persist in the baboon *Papio*  
1313 *papio*. *Experimental Neurology*, *89*(1), 250–258. [https://doi.org/10.1016/0014-](https://doi.org/10.1016/0014-4886(85)90280-8)  
1314 [4886\(85\)90280-8](https://doi.org/10.1016/0014-4886(85)90280-8)
- 1315 Raimondo, J. (2013). A genetically-encoded chloride and pH sensor for dissociating ion  
1316 dynamics in the nervous system. *Frontiers in Cellular Neuroscience*, *7*.  
1317 <https://doi.org/10.3389/fncel.2013.00202>
- 1318 Raimondo, J. V., Burman, R. J., Katz, A. A., & Akerman, C. J. (2015). Ion dynamics during  
1319 seizures. *Frontiers in Cellular Neuroscience*, *9*, 1–14.  
1320 <https://doi.org/10.3389/fncel.2015.00419>
- 1321 Rich, S., Chameh, H. M., Rafiee, M., Ferguson, K., Skinner, F. K., & Valiante, T. A. (2020).  
1322 Inhibitory Network Bistability Explains Increased Interneuronal Activity Prior to Seizure  
1323 Onset. *Frontiers in Neural Circuits*, *13*. <https://doi.org/10.3389/fncir.2019.00081>
- 1324 Saggio, M. L., Crisp, D., Scott, J. M., Karoly, P., Kuhlmann, L., Nakatani, M., Murai, T.,  
1325 Dümpelmann, M., Schulze-Bonhage, A., Ikeda, A., Cook, M., Gliske, S. V, Lin, J.,  
1326 Bernard, C., Jirsa, V., & Stacey, W. C. (2020). A taxonomy of seizure dynamotypes.  
1327 *ELife*, *9*. <https://doi.org/10.7554/eLife.55632>
- 1328 Salami, P., Borzello, M., Kramer, M. A., Westover, M. B., & Cash, S. S. (2022). Quantifying  
1329 seizure termination patterns reveals limited pathways to seizure end. *Neurobiology of*  
1330 *Disease*, *165*, 105645. <https://doi.org/10.1016/j.nbd.2022.105645>
- 1331 Schiff, S. J., Colella, D., Jacyna, G. M., Hughes, E., Creekmore, J. W., Marshall, A., Bozek-  
1332 Kuzmicki, M., Benke, G., Gaillard, W. D., Conry, J., & Weinstein, S. R. (2000). Brain



- 1333 chirps: spectrographic signatures of epileptic seizures. *Clinical Neurophysiology*, *111*(6),  
1334 953–958. [https://doi.org/10.1016/S1388-2457\(00\)00259-5](https://doi.org/10.1016/S1388-2457(00)00259-5)
- 1335 Schindler, K., Leung, H., Elger, C. E., & Lehnertz, K. (2007). Assessing seizure dynamics by  
1336 analysing the correlation structure of multichannel intracranial EEG. *Brain*, *130*(1), 65–  
1337 77. <https://doi.org/10.1093/brain/awl304>
- 1338 Shivacharan, R. S., Chiang, C.-C., Zhang, M., Gonzalez-Reyes, L. E., & Durand, D. M.  
1339 (2019). Self-propagating, non-synaptic epileptiform activity recruits neurons by  
1340 endogenous electric fields. *Experimental Neurology*, *317*, 119–128.  
1341 <https://doi.org/10.1016/j.expneurol.2019.02.005>
- 1342 Somjen, G. G., & Giacchino, J. L. (1985). Potassium and calcium concentrations in interstitial  
1343 fluid of hippocampal formation during paroxysmal responses. *Journal of*  
1344 *Neurophysiology*, *53*(4), 1098–1108. <https://doi.org/10.1152/jn.1985.53.4.1098>
- 1345 Somjen, G. G., Kager, H., & Wadman, W. J. (2008). Computer simulations of neuron-glia  
1346 interactions mediated by ion flux. *Journal of Computational Neuroscience*, *25*(2), 349–  
1347 365. <https://doi.org/10.1007/s10827-008-0083-9>
- 1348 Spencer, S. S., Guimaraes, P., Katz, A., Kim, J., & Spencer, D. (1992). Morphological Patterns  
1349 of Seizures Recorded Intracranially. *Epilepsia*, *33*(3), 537–545.  
1350 <https://doi.org/10.1111/j.1528-1157.1992.tb01706.x>
- 1351 Staley, K. J., & Proctor, W. R. (1999). Modulation of mammalian dendritic GABA A receptor  
1352 function by the kinetics of Cl<sup>-</sup> and HCO<sub>3</sub><sup>-</sup> transport. *The Journal of Physiology*,  
1353 *519*(3), 693–712. <https://doi.org/10.1111/j.1469-7793.1999.0693n.x>
- 1354 Staley, K. J., Soldo, B. L., & Proctor, W. R. (1995). Ionic Mechanisms of Neuronal Excitation  
1355 by Inhibitory GABA A Receptors. *Science*, *269*(5226), 977–981.  
1356 <https://doi.org/10.1126/science.7638623>
- 1357 Suffczynski, P., Gentiletti, D., Gnatkovsky, V., & de Curtis, M. (2017). Extracellular  
1358 Potassium and Focal Seizures—Insight from In Silico Study. In P. Érdi, B. Sen  
1359 Bhattacharya, & A. Cochran (Eds.), *Computational Neurology and Psychiatry*. Springer  
1360 *Series in Bio-/Neuroinformatics* (pp. 49–72). Springer, Cham.

- 1361 [https://doi.org/10.1007/978-3-319-49959-8\\_3](https://doi.org/10.1007/978-3-319-49959-8_3)
- 1362 Sulis Sato, S., Artoni, P., Landi, S., Cozzolino, O., Parra, R., Pracucci, E., Trovato, F.,  
1363 Szczyrkowska, J., Luin, S., Arosio, D., Beltram, F., Cancedda, L., Kaila, K., & Ratto, G.  
1364 M. (2017). Simultaneous two-photon imaging of intracellular chloride concentration and  
1365 pH in mouse pyramidal neurons in vivo. *Proceedings of the National Academy of*  
1366 *Sciences*, *114*(41), E8770–E8779. <https://doi.org/10.1073/pnas.1702861114>
- 1367 Theparambil, S. M., Hosford, P. S., Ruminot, I., Kopach, O., Reynolds, J. R., Sandoval, P. Y.,  
1368 Rusakov, D. A., Barros, L. F., & Gourine, A. V. (2020). Astrocytes regulate brain  
1369 extracellular pH via a neuronal activity-dependent bicarbonate shuttle. *Nature*  
1370 *Communications*, *11*(1), 5073. <https://doi.org/10.1038/s41467-020-18756-3>
- 1371 Thompson, S. M., & Gahwiler, B. H. (1989). Activity-dependent disinhibition. II. Effects of  
1372 extracellular potassium, furosemide, and membrane potential on ECl<sup>-</sup> in hippocampal  
1373 CA3 neurons. *Journal of Neurophysiology*, *61*(3), 512–523.  
1374 <https://doi.org/10.1152/jn.1989.61.3.512>
- 1375 Timofeev, I., & Steriade, M. (2004). Neocortical seizures: initiation, development and  
1376 cessation. *Neuroscience*, *123*(2), 299–336.  
1377 <https://doi.org/10.1016/j.neuroscience.2003.08.051>
- 1378 Toyoda, I., Fujita, S., Thamattoor, A. K., & Buckmaster, P. S. (2015). Unit Activity of  
1379 Hippocampal Interneurons before Spontaneous Seizures in an Animal Model of Temporal  
1380 Lobe Epilepsy. *Journal of Neuroscience*, *35*(16), 6600–6618.  
1381 <https://doi.org/10.1523/JNEUROSCI.4786-14.2015>
- 1382 Traub, R. D., Buhl, E. H., Gloveli, T., & Whittington, M. A. (2003). Fast Rhythmic Bursting  
1383 Can Be Induced in Layer 2/3 Cortical Neurons by Enhancing Persistent Na<sup>+</sup>  
1384 Conductance or by Blocking BK Channels. *Journal of Neurophysiology*, *89*(2), 909–921.  
1385 <https://doi.org/10.1152/jn.00573.2002>
- 1386 Traynelis, S. F., & Dingledine, R. (1988). Potassium-induced spontaneous electrographic  
1387 seizures in the rat hippocampal slice. *Journal of Neurophysiology*, *59*(1), 259–276.  
1388 <https://doi.org/10.1152/jn.1988.59.1.259>

- 1389 Truccolo, W., Donoghue, J. A., Hochberg, L. R., Eskandar, E. N., Madsen, J. R., Anderson, W.  
1390 S., Brown, E. N., Halgren, E., & Cash, S. S. (2011). Single-neuron dynamics in human  
1391 focal epilepsy. *Nature Neuroscience*, *14*(5), 635–643. <https://doi.org/10.1038/nn.2782>
- 1392 Uva, L., Breschi, G. L., Gnatkovsky, V., Taverna, S., & de Curtis, M. (2015). Synchronous  
1393 inhibitory potentials precede seizure-like events in acute models of focal limbic seizures.  
1394 *Journal of Neuroscience*, *35*(7), 3048–3055. [https://doi.org/10.1523/JNEUROSCI.3692-](https://doi.org/10.1523/JNEUROSCI.3692-14.2015)  
1395 [14.2015](https://doi.org/10.1523/JNEUROSCI.3692-14.2015)
- 1396 Uva, L., & de Curtis, M. (2020). Activity- and pH-dependent adenosine shifts at the end of a  
1397 focal seizure in the entorhinal cortex. *Epilepsy Research*, *165*, 106401.  
1398 <https://doi.org/10.1016/j.eplepsyres.2020.106401>
- 1399 Velascol, A. L., Wilson, C. L., Babb, T. L., & Engel Jr, J. (2000). Functional and Anatomic  
1400 Correlates of Two Frequently Observed Temporal Lobe Seizure-Onset Patterns. *Neural*  
1401 *Plasticity*, *7*(1–2), 49–63. <https://doi.org/10.1155/NP.2000.49>
- 1402 Viitanen, T., Ruusuvuori, E., Kaila, K., & Voipio, J. (2010). The K<sup>+</sup>-Cl<sup>-</sup> cotransporter KCC2  
1403 promotes GABAergic excitation in the mature rat hippocampus. *Journal of Physiology*,  
1404 *588*(9), 1527–1540. <https://doi.org/10.1113/jphysiol.2009.181826>
- 1405 Wei, Y., Ullah, G., Ingram, J., & Schiff, S. J. (2014). Oxygen and seizure dynamics: II.  
1406 Computational modeling. *Journal of Neurophysiology*, *112*(2), 213–223.  
1407 <https://doi.org/10.1152/jn.00541.2013>
- 1408 Wei, Y., Ullah, G., & Schiff, S. J. (2014). Unification of neuronal spikes, seizures, and  
1409 spreading depression. *Journal of Neuroscience*, *34*(35), 11733–11743.  
1410 <https://doi.org/10.1523/JNEUROSCI.0516-14.2014>
- 1411 Wen, B., Qian, H., Feng, J., Ge, R.-J., Xu, X., Cui, Z.-Q., Zhu, R.-Y., Pan, L.-S., Lin, Z.-P., &  
1412 Wang, J.-H. (2015). A Portion of Inhibitory Neurons in Human Temporal Lobe Epilepsy  
1413 are Functionally Upregulated: An Endogenous Mechanism for Seizure Termination. *CNS*  
1414 *Neuroscience & Therapeutics*, *21*(2), 204–214. <https://doi.org/10.1111/cns.12336>
- 1415 Yaari, Y., Konnerth, A., & Heinemann, U. (1983). Spontaneous epileptiform activity of cal  
1416 hippocampal neurons in low extracellular calcium solutions. *Experimental Brain*

- 1417 *Research*, 51(1). <https://doi.org/10.1007/BF00236813>
- 1418 Yekhlief, L., Breschi, G. L., Lagostena, L., Russo, G., & Taverna, S. (2015). Selective  
1419 activation of parvalbumin- or somatostatin-expressing interneurons triggers epileptic  
1420 seizurelike activity in mouse medial entorhinal cortex. *Journal of Neurophysiology*,  
1421 113(5), 1616–1630. <https://doi.org/10.1152/jn.00841.2014>
- 1422 Ziburkus, J., Cressman, J. R., Barreto, E., & Schiff, S. J. (2006). Interneuron and pyramidal  
1423 cell interplay during in vitro seizure-like events. *Journal of Neurophysiology*, 95(6),  
1424 3948–3954. <https://doi.org/10.1152/jn.01378.2005>
- 1425 Ziemann, A. E., Schnizler, M. K., Albert, G. W., Severson, M. A., Howard III, M. A., Welsh,  
1426 M. J., & Wemmie, J. A. (2008). Seizure termination by acidosis depends on ASIC1a.  
1427 *Nature Neuroscience*, 11(7), 816–822. <https://doi.org/10.1038/nn.2132>
- 1428 Zubler, F., Steimer, A., Gast, H., & Schindler, K. A. (2014). Seizure Termination. In  
1429 *International Review of Neurobiology* (pp. 187–207). Academic Press Inc.  
1430 <https://doi.org/10.1016/B978-0-12-418693-4.00008-X>

1431

## 1432 **Figure legends**

1433 **Figure 1. Model diagram.** The model consisted of four pyramidal cells (orange) and an  
1434 interneuron (green) linked by excitatory (AMPA) and inhibitory (GABA<sub>A</sub>) synaptic connections.  
1435 Each cellular compartment was surrounded by an interstitial compartment. The interstitial space  
1436 was enclosed in a common bath (blue) which represented the surrounding tissue and vasculature  
1437 not included in the model. The model included variable intracellular and extracellular ion  
1438 concentrations computed according to ionic currents flowing across neuronal membranes,  
1439 longitudinal diffusion between the dendritic and somatic compartments, radial diffusion between  
1440 neighboring interstitial compartments and diffusion to/from the bath. Additionally, the model  
1441 included ionic regulation mechanisms: a Na<sup>+</sup>/K<sup>+</sup>-pump, a KCC2 cotransporter and K<sup>+</sup> buffering  
1442 by astrocytes.

1443 **Figure 2. Model behavior during an SLE.** (A) Local field potential (LFP) signal. (B)  
1444 Pyramidal cell (PY) membrane potential. (C) Interneuron (IN) membrane potential. (D)

1445 Extracellular potassium concentration. **(E)** Intracellular sodium concentration. **(F)** Intracellular  
1446 chloride concentration. In the interictal phase (0–60 seconds), the model generated irregular  
1447 background firing and the ion concentrations were at their resting values **(A–F)**. The current  
1448 injected into the interneuron at second 60 **(C, yellow)** triggered fast IN spiking **(C, black)** which  
1449 also manifested as low voltage fast activity in the LFP signal **(A)**. Approximately 10 seconds  
1450 after the initiation of the SLE, PY cells initiated tonic firing that subsequently shifted to bursting  
1451 **(B)**. The behavior of the PY cells was reflected in the LFP trace which showed irregular activity  
1452 and synchronized bursting **(A)**. The SLE terminated at approximately second 120 and was  
1453 followed by a period of reduced excitability **(A–C)**. The cellular activity was accompanied by  
1454 significant ion concentration shifts. Extracellular potassium in the somatic compartment  
1455 increased sharply and remained elevated throughout the SLE **(D, dark blue)**. The  $[K^+]_o$  increase  
1456 in the dendritic compartment was slower and less pronounced **(D, violet)**. The intracellular  
1457 sodium increased gradually toward a plateau **(E)**. The intracellular chloride accumulated steadily  
1458 throughout the SLE **(F)**.

1459 **Figure 3. A comparison between the experimental data and the model simulation. (A)**  
1460 Experimental recordings of a seizure-like event (SLE) in the *in vitro* isolated whole guinea pig  
1461 brain preparation (de Curtis et al., 2006; Gnatkovsky et al., 2008; Uva et al., 2015). From top to  
1462 bottom: LFP signal, intracellular recording of pyramidal cell (PY) and interneuron (IN),  
1463 extracellular potassium. The onset of the SLE was associated with increased IN firing, silencing  
1464 PY and low-voltage fast (LVF) activity in the LFP signal. Approximately 10 seconds after the  
1465 onset of the SLE, the PY exhibited a tonic and then burst firing behavior. The extracellular  
1466 potassium increased up to approximately 10 mM at the onset of the SLE and remained elevated  
1467 afterward. **(B)** The activity patterns in the LFP signal, pyramidal cells, interneuron and  $[K^+]_o$   
1468 were reproduced accurately by the model. Signals presented in Figure 3a were recorded in  
1469 different experiments. LFP and interneuron data have been published previously (Gentiletti et  
1470 al., 2017; Gnatkovsky et al., 2008) while pyramidal cell and  $[K^+]_o$  data have never been published  
1471 before.

1472 **Figure 4. Analysis of the model.** In the bifurcation analysis extracellular potassium and  
1473 intracellular sodium concentrations in the PY and IN cells were control parameters.  
1474 Concentrations of all other ions were fixed at their reference values (except chloride:  $[Cl^-]_{i,soma}$ ,  
1475  $[Cl^-]_{i,dend}$  equal to 7 mM), all ion accumulation mechanisms were blocked and background input  
1476 was removed. **(A)** Bifurcation diagrams showing the dependence of the behavior of the model

1477 on  $[K^+]_{o,dend}$  and  $[K^+]_{o,soma}$  for varying values of  $[Na^+]_{i,soma}$ ,  $[Na^+]_{i,dend}$ . The diagram colors  
1478 correspond to types of activity shown on the right: rest (yellow), tonic firing (violet) and bursting  
1479 (dark blue). An increase in  $[Na^+]_i$  progressively decreased the domains of tonic firing and  
1480 bursting and increased the resting domain indicating a general decrease in network excitability.  
1481 The black and gray arrows correspond to the evolution of  $[K^+]_{o,soma}$ ,  $[K^+]_{o,dend}$  during different  
1482 phases of the SLE, shown in part **B**. **(B)** A simulation of the model with  $[K^+]_{o,soma}$ ,  $[K^+]_{o,dend}$  and  
1483  $[Na^+]_{i,soma}$ ,  $[Na^+]_{i,dend}$  as the external control parameters, that illustrated the occurrence of  
1484 transitions between different types of activity during the SLE. The top two panels show the time  
1485 course of  $[K^+]_{o,soma}$ ,  $[K^+]_{o,dend}$  and  $[Na^+]_{i,soma}$ ,  $[Na^+]_{i,dend}$  and approximate their evolution during  
1486 the SLE (Figure 2). The third panel shows the resulting PY cell behavior. The parameter  
1487 evolution is divided into four phases indicated by the arrows denoted as I–IV in part **A** and **B**.  
1488 Phase I corresponds to a sharp increase in  $[K^+]_{o,soma}$  which led to a transition from rest to tonic  
1489 firing (marked as a black arrow ‘I’ in the first panel in **A**). Phase II corresponds to a slow increase  
1490 in  $[K^+]_{o,dend}$  which led to a transition from tonic firing to bursting (marked as a black arrow ‘II’  
1491 in the first and second panels in **A**). Phase III represents a period of increased  $[Na^+]_{i,soma}$ ,  
1492  $[Na^+]_{i,dend}$  and decreasing  $[K^+]_{o,soma}$  and  $[K^+]_{o,dend}$  which led to the termination of the SLE  
1493 (represented by a black arrow ‘III’ with its tip in the yellow domain in the third panel in **A**).  
1494 Phase IV corresponds to the postictal period with elevated  $[Na^+]_i$  and a return of  $[K^+]_{o,soma}$ ,  
1495  $[K^+]_{o,dend}$  to their baseline values (marked as a black arrow ‘IV’ in the third panel in **A**).

1496 **Figure 5. A comparison of the model without and with chloride accumulation.** The six  
1497 panels in each column show respectively (from top to bottom): the LFP signal, the PY cell  
1498 membrane potential, the IN membrane potential, the extracellular potassium concentration and  
1499 intracellular chloride concentration, the chloride and potassium KCC2 currents in the somatic  
1500 compartments and the GABA<sub>A</sub> synaptic currents ( $Cl^-$  and  $HCO_3^-$ ) together with the leak chloride  
1501 current. Additionally, the equilibrium potential of chloride and GABA<sub>A</sub> are shown in the second  
1502 panel from the top. **(A)** When the  $[Cl^-]_i$  accumulation mechanism was blocked, the chloride  
1503 concentration was fixed at the reference value (fourth panel, blue). Without chloride  
1504 accumulation, the PY cell (second panel) fired tonic train of spikes due to transient rise in  $[K^+]_o$   
1505 (fourth panel, red) mediated by the IN discharge triggered by the current injection (yellow, third  
1506 panel). Elevated  $[K^+]_o$  and fixed  $[Cl^-]_i$  promoted  $K^+$  influx via KCC2 (fifth panel, red), thus  
1507 lowering  $[K^+]_o$  and further preventing the generation of the full SLE. **(B)** With chloride  
1508 accumulation, the IN discharge led to an increase in  $E_{Cl}$  and  $E_{GABA_A}$  (second panel, blue and light  
1509 blue) which reduced the hyperpolarizing  $I_{Cl,leak}$  and  $I_{GABA_A}$  currents and enhanced excitability.



1510 The increase in firing rate of the PY cells led to prolonged  $[K^+]_o$  accumulation (fourth panel, red)  
1511 leading to the full SLE.

1512 **Figure 6. The evolution of inter-burst intervals (IBI) in the model and experimental data.**

1513 **(A)** In the simulation, the background input was removed and compensated with a small  
1514 depolarizing current injected into the PY cells to preserve the duration of the SLE. A decreasing  
1515 rate of bursting is visible in the LPF signal and in the detected bursts marked above the trace (top  
1516 panel). The evolution of the IBI is shown with the y-axis on a linear scale (middle panel) and a  
1517 log scale (bottom). On a linear y-axis plot, the data appear curved while on a semi-log plot they  
1518 lay on a straight line, suggesting exponential scaling of the IBI with time. The red line in each  
1519 plot represents the best fit for the detected IBI; linear function (middle panel) and exponential  
1520 function providing a linear relationship on a semi-log plot (bottom panel). The root mean square  
1521 error (RMSE) between the data points and fitted function is shown in each window. The  
1522 exponential function fit yielded a smaller RMSE compared to the linear, logarithmic or square  
1523 root fits (see Methods), providing quantitative confirmation that at the end of the simulated SLE,  
1524 the IBI duration increased exponentially with time. **(B)** The evolution of the IBI during the SLE  
1525 induced by application of bicuculline in the whole-brain *in vitro* preparation (Boido et al., 2014;  
1526 Gnatkovsky et al., 2008). **(C)** IBI evolution during a seizure recorded with intracerebral  
1527 electrodes positioned in the temporal lobe in a patient submitted to presurgical evaluation  
1528 (courtesy of Laura Tassi, Epilepsy Surgery Center, Niguarda Hospital, Milano, Italy). In **B** and  
1529 **C**, the detected IBI lay on a straight line on the semi-log plot and the exponential fit resulted in  
1530 a smaller RMSE compared to the linear, logarithmic or square root fits, validating the model  
1531 prediction of an exponential increase in the IBI at the end of a seizure. Only linear and  
1532 exponential fits are shown. The results for all considered fits are provided in Figure 6 – source  
1533 data 1.

1534 **Figure 6 – supplementary figure 1. Inter-burst interval slowing mediated by ion**

1535 **concentration changes.** The SLE was simulated by variations in  $K^+$ ,  $Na^+$  and  $Cl^-$  concentrations.

1536 For the first 50 seconds ion concentrations varied as in Figure 4B. Afterwards, the concentration  
1537 of only one ion type was varied, while concentrations of all other ions were held constant. **(A)**  
1538 In the bursting phase, discharges of PY cells were synchronous and the network dynamics was  
1539 well captured by the membrane potential of a single PY cell, shown in the top panel. After second  
1540 50, a linear decrease in  $[K^+]_o$  (second panel) and constant  $[Na^+]_i$  and  $[Cl^-]_i$  (third and fourth panel,  
1541 respectively) led to IBI slowing and SLE termination. The detected bursts are marked above the



1542 trace. Blue bars mark analyzed IBI epoch. Four bottom panels show evolution of IBI (black  
1543 points) fitted with linear, exponential, square root and logarithmic functions (red lines, see  
1544 Methods), as marked on the left of the figure. The root mean square error (RMSE) between the  
1545 data points and fitted function is shown in each window. Among all four fits, exponential fit  
1546 marked by blue rectangle, provided the lowest RMSE. **(B)** Linear increase in  $[\text{Na}^+]_i$  or **(C)** linear  
1547 decrease in  $[\text{Cl}^-]_i$  led to logarithmic IBI scaling (blue rectangle).

1548 **Figure 7. An analysis of network excitability in the postictal period.** In this figure, the  
1549 background input was removed from the simulation and compensated with a small depolarizing  
1550 current injected into the PY cells, as in Figure 6. **(A)** The LFP signal. **(B)** The PY cell membrane  
1551 potential with external periodic stimulation delivered every 5 seconds, marked by the arrows  
1552 (violet, stim.). The amplitude of the stimulation was set at just above the threshold for triggering  
1553 a spike in the interictal period. **(C)** The extracellular potassium in the somatic and dendritic  
1554 compartments. **(D and E)** The net  $\text{Na}^+/\text{K}^+$ -pump current in the somatic and dendritic  
1555 compartment, respectively. The vertical broken line (blue) in all panels marks the SLE offset  
1556 time without periodic stimulation. Immediately after termination of the SLE, the network was  
1557 still excitable due to increased  $[\text{K}^+]_o$ . Shortly afterward, the excitability decreased due to an  
1558 increased  $\text{Na}^+/\text{K}^+$ -pump current that outlasted the increase in  $[\text{K}^+]_o$ . Increased  $I_{\text{pump}}$  and decreased  
1559  $[\text{K}^+]_o$  which occurred shortly after the termination of the SLE, led to a postictal period during  
1560 which the network did not respond to external stimulation for approximately 90 seconds.

## 1561 Appendix I figure legends

1562 **Appendix I - figure 1. A bifurcation diagram of a single PY cell.** The 2D bifurcation diagram  
1563 demonstrates the behavior of a single PY cell as a function of extracellular potassium  
1564 concentration in the dendritic ( $[\text{K}^+]_{o,\text{dend}}$ ) and somatic compartments ( $[\text{K}^+]_{o,\text{soma}}$ ) used as control  
1565 parameters. Concentrations of all other ions were fixed at their reference values (except chloride:  
1566  $[\text{Cl}^-]_{i,\text{soma}}$ ,  $[\text{Cl}^-]_{i,\text{dend}}$  equal to 7 mM), all ion accumulation mechanisms were blocked and all  
1567 synaptic connections were removed. **(A)** The three graphs show the PY cell activity traces for  
1568 different values of the control parameters: resting (yellow,  $[\text{K}^+]_{o,\text{soma}} = 3.5$  mM,  $[\text{K}^+]_{o,\text{dend}} = 3.5$   
1569 mM), tonic firing (violet,  $[\text{K}^+]_{o,\text{soma}} = 4.5$  mM,  $[\text{K}^+]_{o,\text{dend}} = 4$  mM) and bursting (dark blue,  
1570  $[\text{K}^+]_{o,\text{soma}} = 6.5$  mM,  $[\text{K}^+]_{o,\text{dend}} = 4$  mM). In each panel, 2 seconds of activity is shown. **(B)** The  
1571 colors of the 2D diagram correspond to the types of activity shown above in **(A)**. For low  
1572  $[\text{K}^+]_{o,\text{dend}}$  and  $[\text{K}^+]_{o,\text{soma}}$  the cell was at rest. A moderate increase in either  $[\text{K}^+]_{o,\text{dend}}$  or  $[\text{K}^+]_{o,\text{soma}}$ ,

1573 or both, led to tonic firing. Subsequent increases in these parameters led to bursting.

1574 **Appendix I - figure 2. A comparison of tonic firing (A) and bursting (B) of a PY cell.** In  
1575 each column, the membrane potential of a cell (top) and the activation gate of  $I_{KM}$  (bottom) is  
1576 shown. During tonic firing, the activation gate of the M-type potassium current was closed. The  
1577 prolonged depolarization of the cell during bursting led to the opening of the activation gate  $m$   
1578 and activation of the  $I_{KM}$  current, which eventually terminated the burst. The simulation was  
1579 performed using an isolated PY cell model with the concentrations of all ions fixed at their  
1580 reference values, except  $[Cl^-]_{i,soma} = 7$ ,  $[Cl^-]_{i,dend} = 7$  mM and (A):  $[K^+]_{o,soma} = 3.5$  mM,  $[K^+]_{o,dend}$   
1581  $= 4.5$  mM, (B):  $[K^+]_{o,soma} = 5.25$  mM and  $[K^+]_{o,dend} = 4.5$  mM.

1582 **Appendix I - figure 3. A simulation of biphasic GABA<sub>A</sub> response.** In this simulation size of  
1583 both PY compartments was scaled down by factor 10, to represent small dendritic compartments.  
1584 Single GABA<sub>A</sub> synapse was located in a segment having diameter 1.5  $\mu$ m and length 2  $\mu$ m (i.e.,  
1585 having volume 1000 times smaller and GABA<sub>A</sub> conductance density 100 times larger than soma  
1586 in the original model). (A) High frequency IN firing (shown schematically by  $V_{IN}$ , yellow; not  
1587 to scale) was induced by IN current stimulation of 100 ms duration. GABA<sub>A</sub> receptor-mediated  
1588 postsynaptic potential response consisted of the initial hyperpolarization followed by a long-  
1589 lasting depolarization ( $V_{PY}$ , black). Chloride accumulation ((B), blue) was mediated by large  $Cl^-$   
1590 influx via GABA<sub>A</sub> receptor as compared to  $Cl^-$  extrusion via KCC2 ((C) vs. (D)). Accordingly,  
1591 the biphasic potential resulted from positive shift in  $E_{Cl}$  ((A), blue) and relatively high  $E_{HCO_3}$   
1592 ((A), violet) leading to depolarizing shift in  $E_{GABA_A}$  ((A), light blue). During GABA<sub>A</sub> receptor  
1593 activation  $V_{PY}$  was clamped to  $E_{GABA_A}$  due to large GABA<sub>A</sub> conductance density.

1594 **Appendix I - figure 4. Volume changes during an SLE in the model.** The panels show from  
1595 top to bottom: LFP, relative volume changes and representative changes in intracellular  $A^-$  ion  
1596 and extracellular  $Cl^-$  concentration in the PY somatic compartment during an SLE.  $[A^-]_i$  was  
1597 affected only by volume changes while  $[Cl^-]_o$  was additionally affected by inward chloride leak  
1598 and GABA<sub>A</sub> currents, KCC2 and  $Cl^-$  diffusion to the bath. It can be seen that an increase in  
1599 intracellular space (IS) volume (second panel, dark blue) is exactly mirrored by a decrease in  $[A^-]$   
1600  $]_i$ . A decrease in extracellular space (ES) volume (third panel, violet) gives rise to an increase in  
1601  $[Cl^-]_o$  above baseline despite  $Cl^-$  influx into the cells, in agreement with the experimental data  
1602 (Dietzel et al., 1982).

## 1603 **Source data files**

### 1604 **Figure 3 – source data 1**

1605 Source files for an SLE recordings in the *in vitro* isolated whole guinea pig brain

1606 This zip archive contains experimental data shown in Figure 3. Seizure-like events were induced  
1607 by 3-min arterial perfusion of 50 microM bicuculline and were recorded in the entorhinal cortex  
1608 of the *in vitro* isolated whole guinea pig brain. The data are in the Matlab format (.mat). Matlab  
1609 script (.m) loads the data from the file and creates the plot.

### 1610 **Figure 6 – source data 1**

1611 Source files for seizure data used in the analysis of inter-burst interval slowing.

1612 This zip archive contains simulated and experimental data shown in Figure 6. The source data  
1613 are in the Matlab format (.mat). Separate Matlab scripts (.m) are provided for the analysis of  
1614 inter-burst interval distribution at the end of a seizure in the Model, Whole guinea pig brain and  
1615 TLE patient. Each script loads the data, calculates linear, exponential, logarithmic and square  
1616 root fits with root mean square error and creates the plots for each fit.

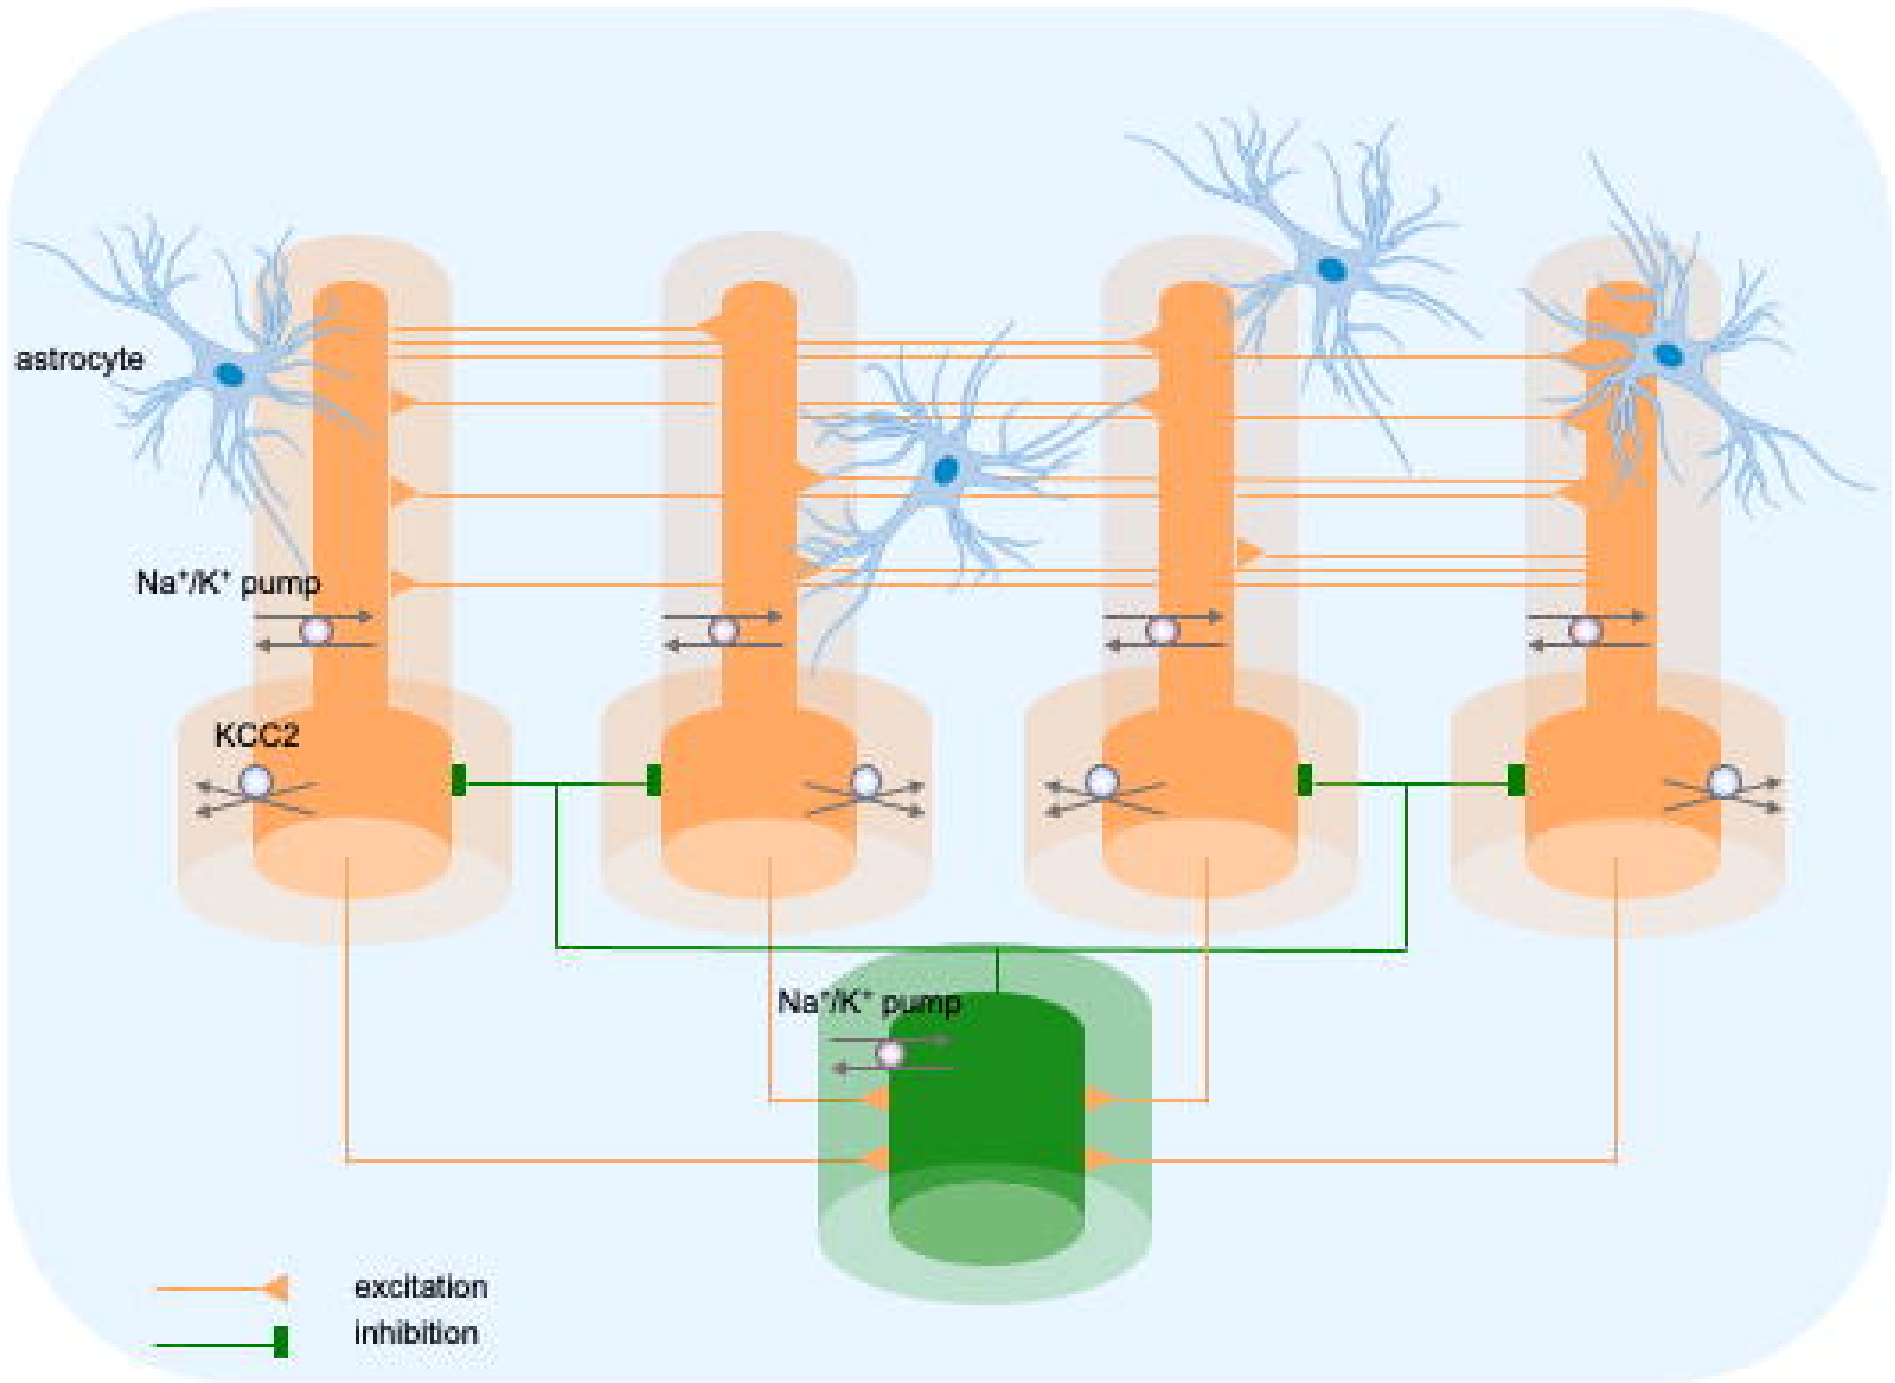

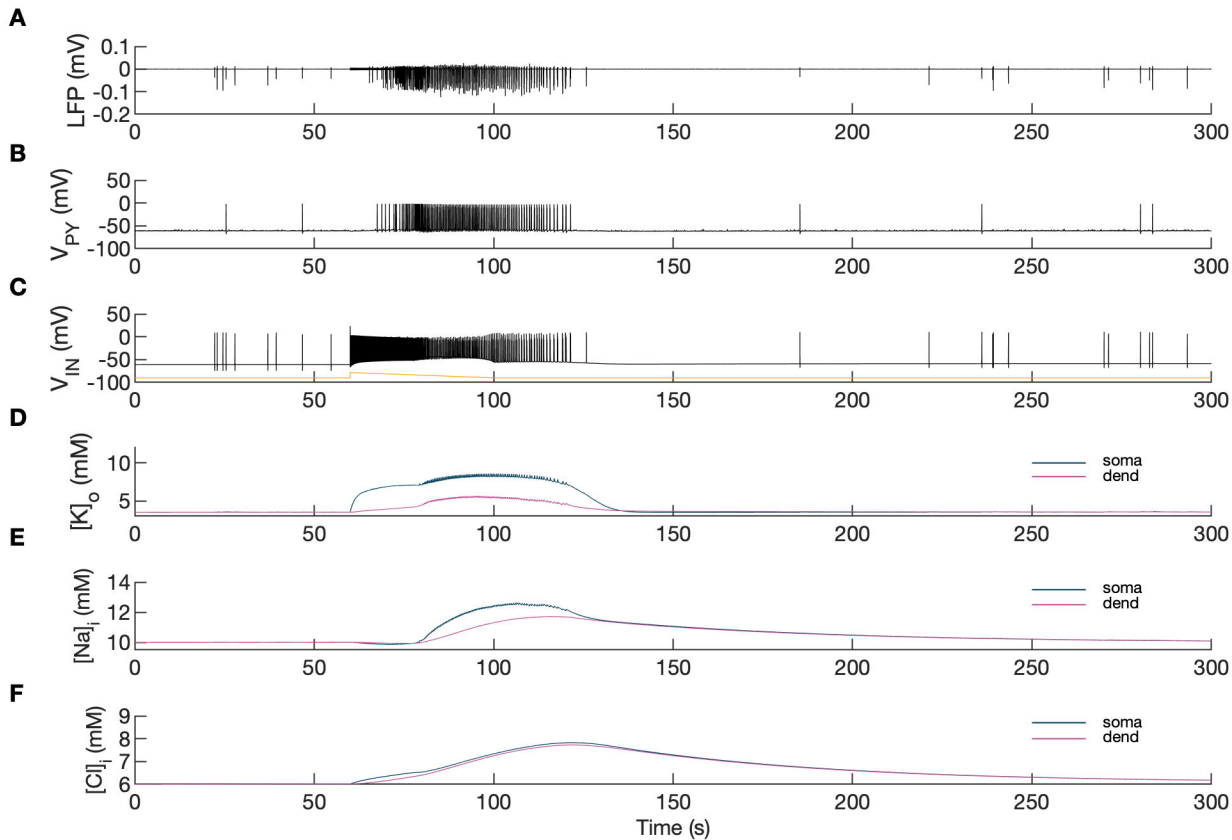

**A**

Experimental data

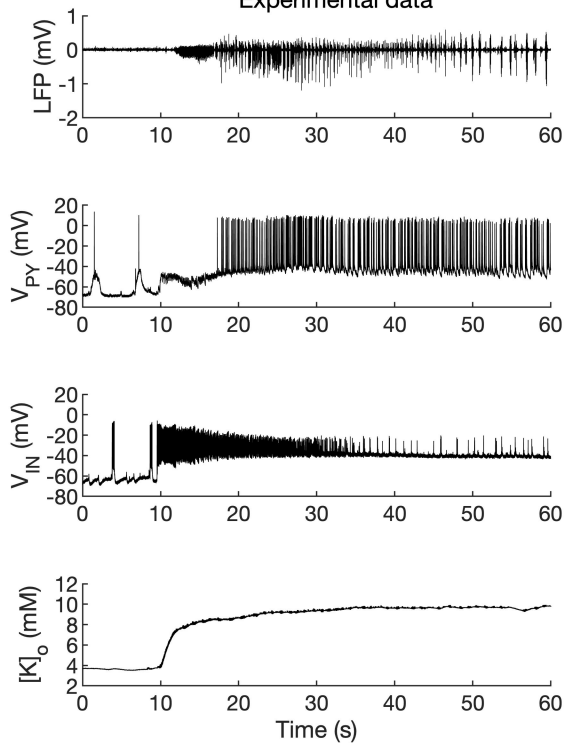**B**

Model simulation

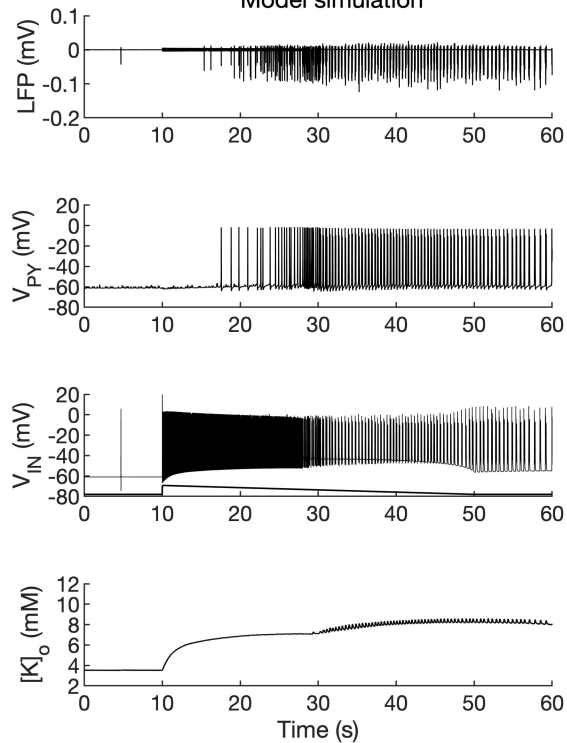

**A**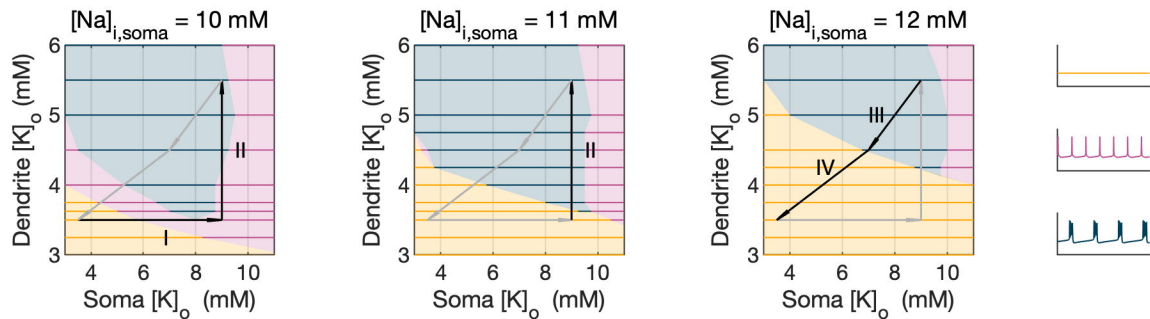**B**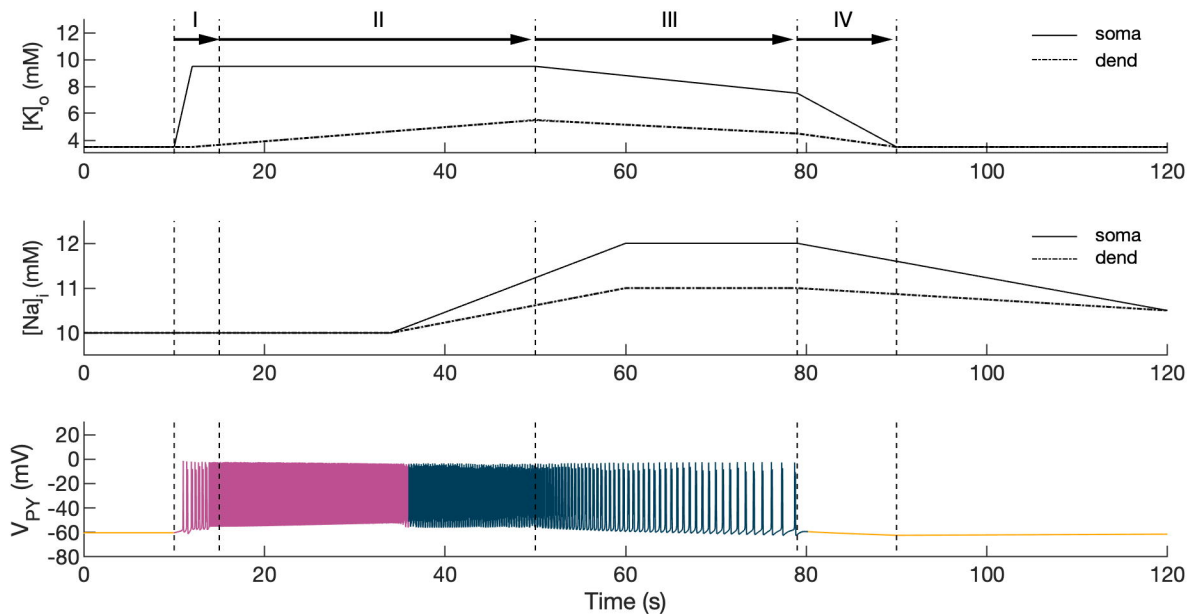



**A**Without  $\text{Cl}^-$  accumulation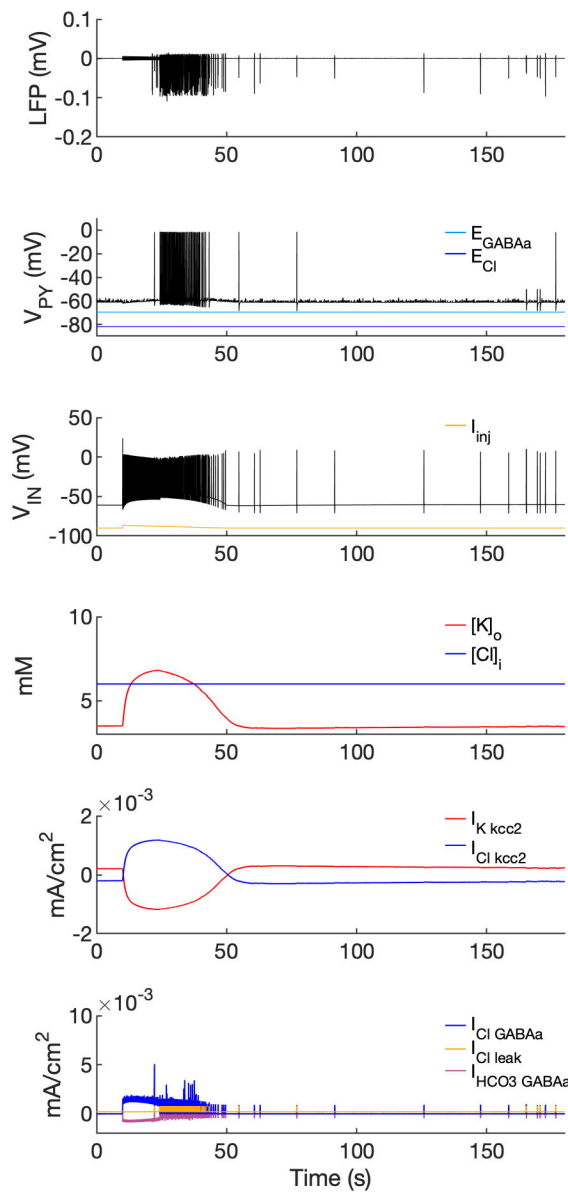**B**With  $\text{Cl}^-$  accumulation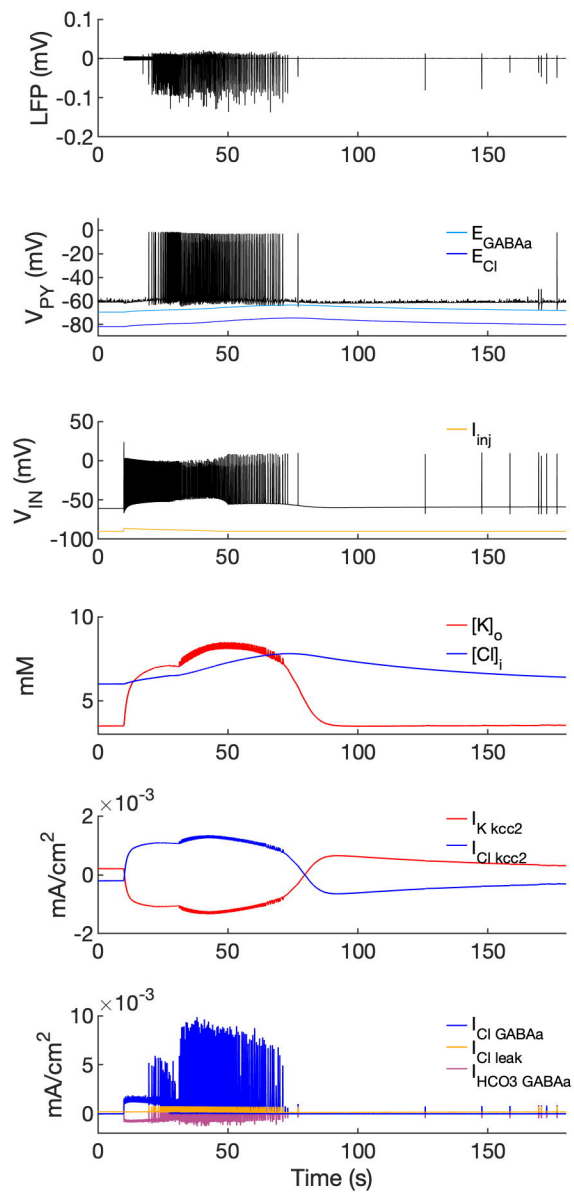

**A** IBI evolution -  $[K]_o$  change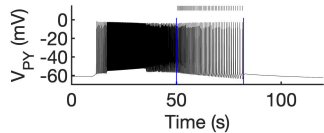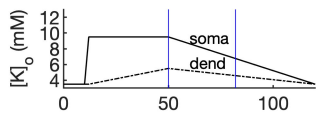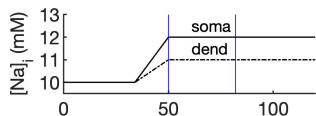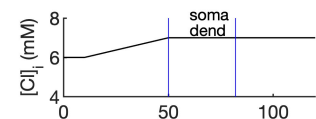**B** IBI evolution -  $[Na]_i$  change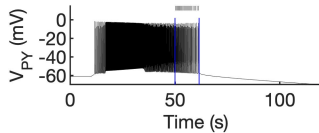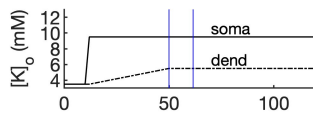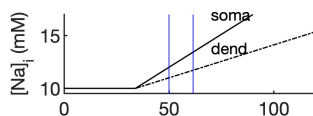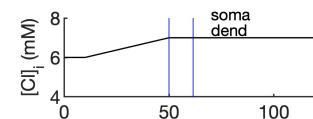**C** IBI evolution -  $[Cl]_i$  change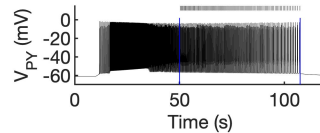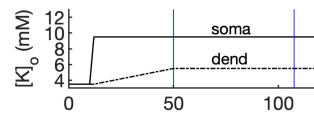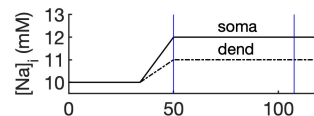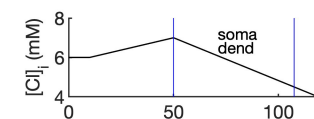

linear

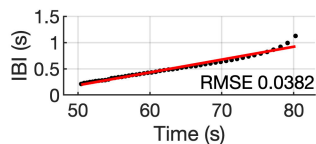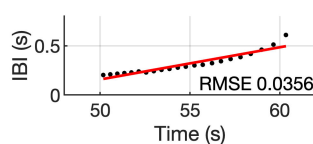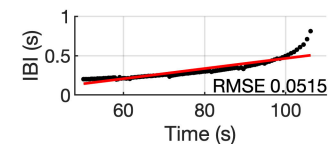

exp

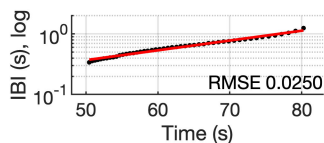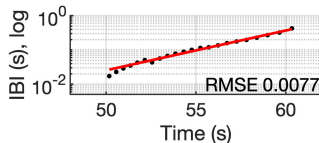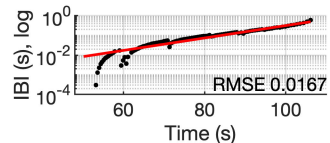

sqrt

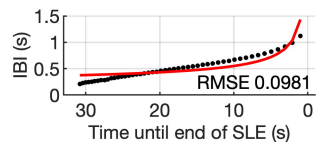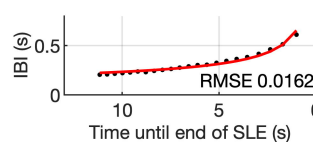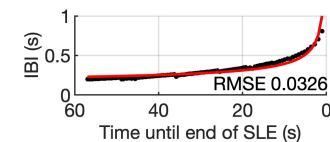

log

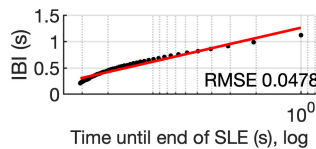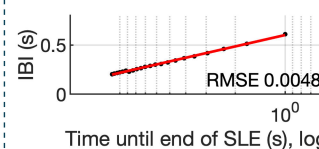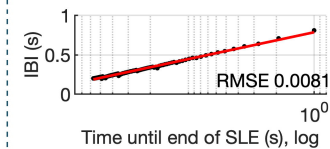

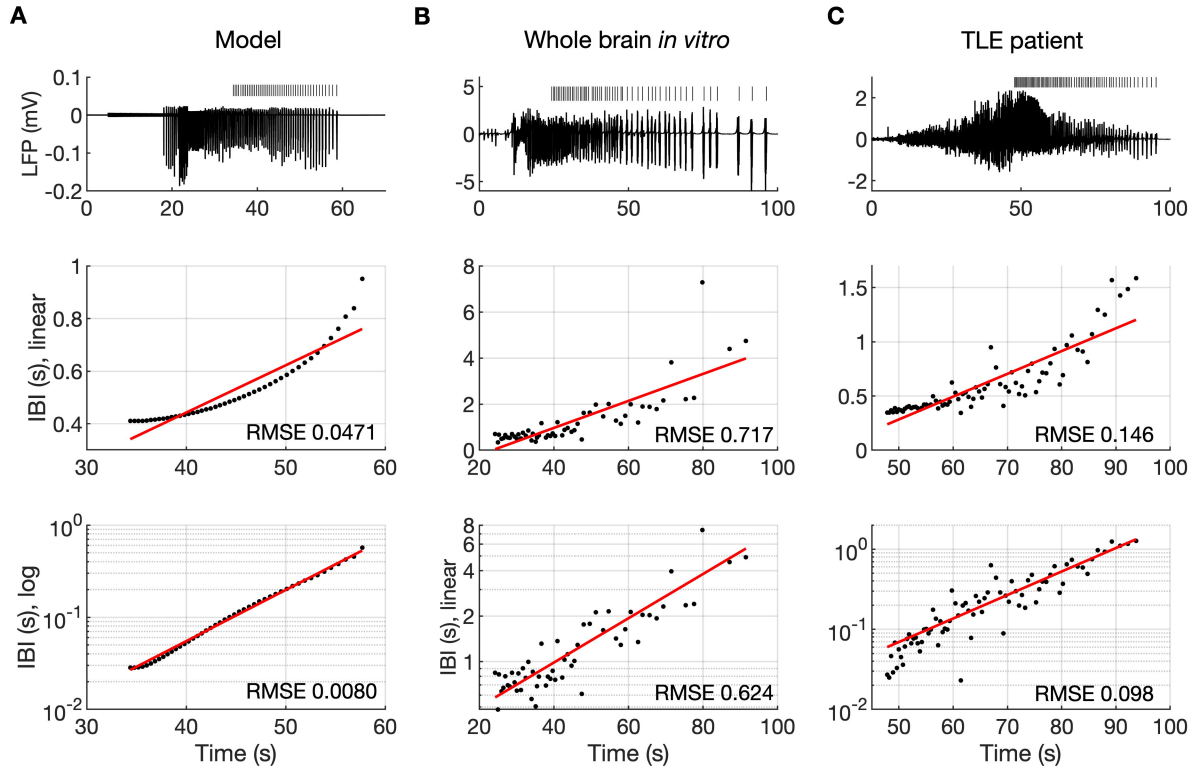

**A**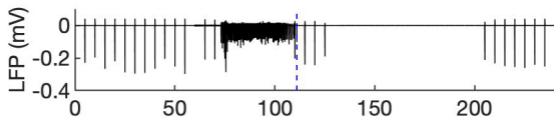**B**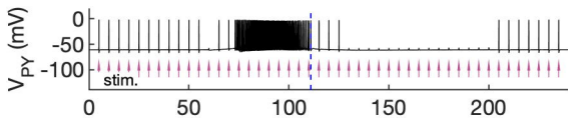**C**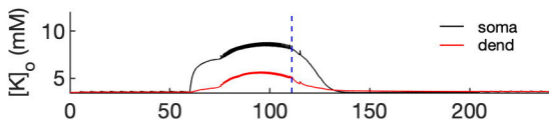**D**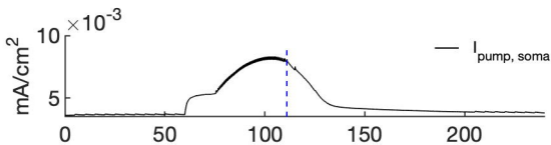**E**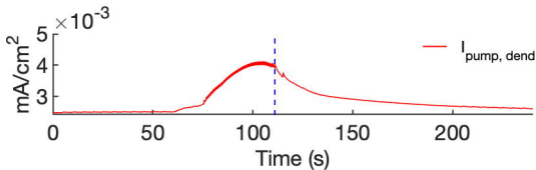

**A**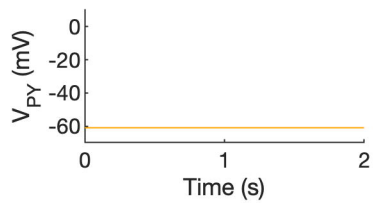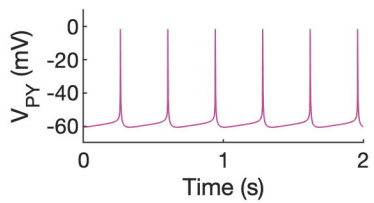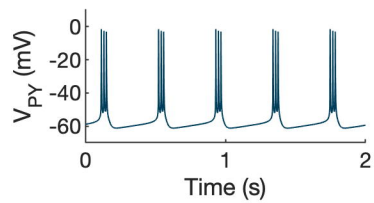**B**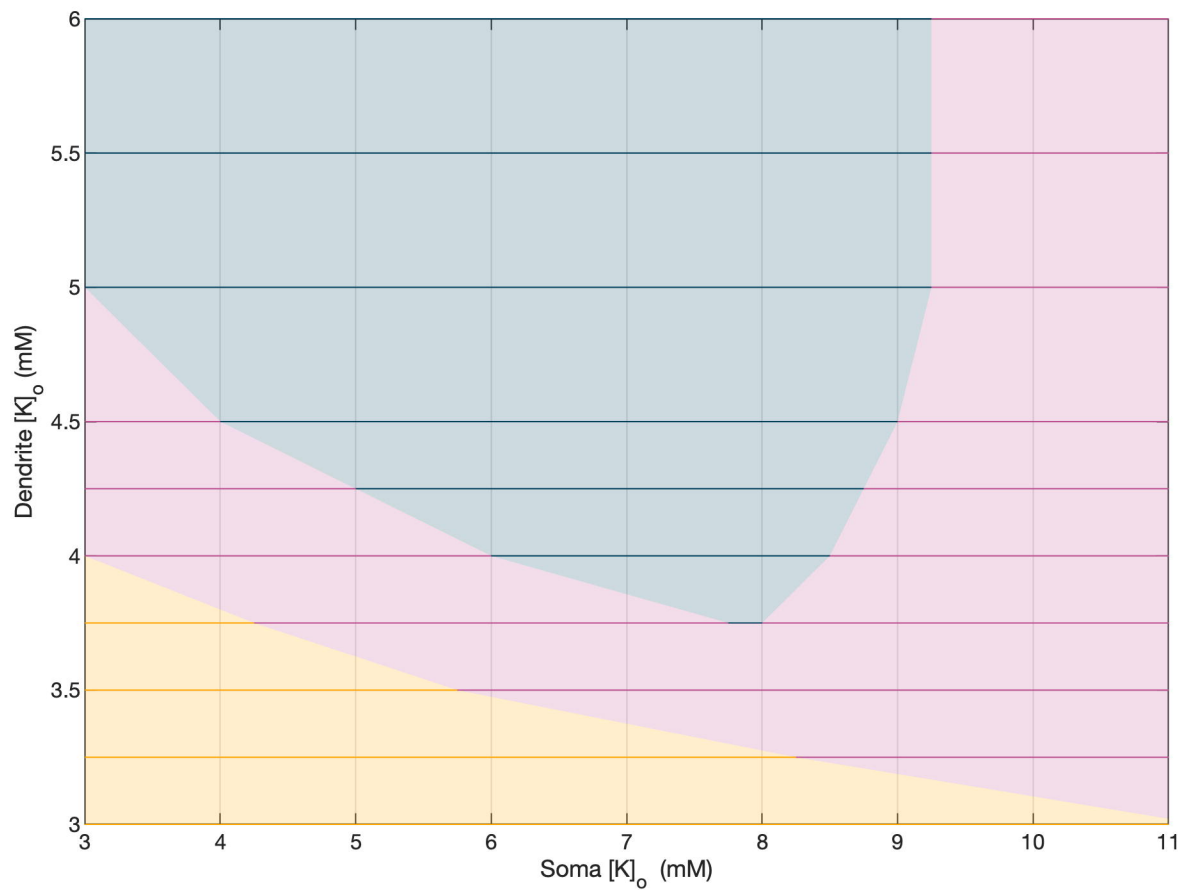

**A**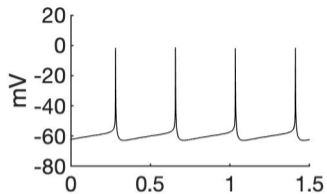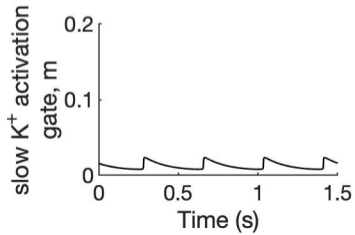**B**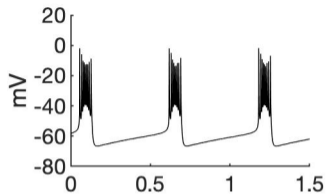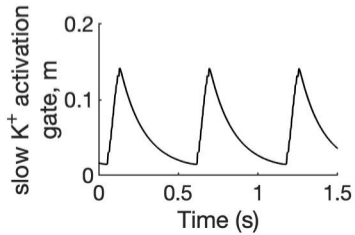

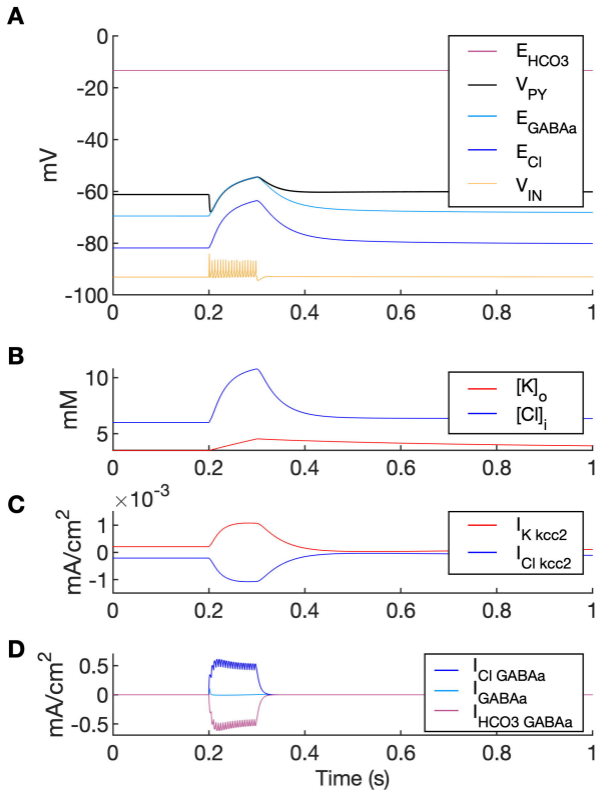



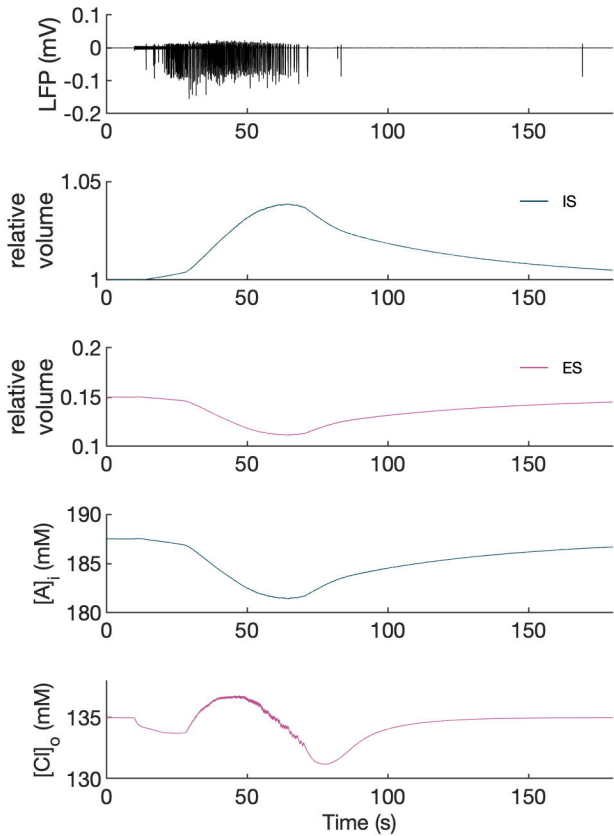

Source: https://www.biorxiv.org/content/10.1101/2021.03.18.435995v3.full.pdf
